# Supplementary material for: Nucleoredoxin-Dependent Targets and Processes in Neuronal Cells
Source: Oxid Med Cell Longev. 2018 Nov 21;2018:4829872. doi: 10.1155/2018/4829872 (PMC6280245; doi:10.1155/2018/4829872)
Supplement: Supplementary 2 — The list contains 171 potential Nrx interaction partners identified using the differential labeling approach in SH-SY5Y cells depleted of Nrx compared to control cells. Included are proteins with a significantly changed redox state, i.e., p values < 0.5. The proteins are in order of the differences in the thiol-redox state, beginning with the more reduced protein thiols. [file 4829872.f2.xlsx]

## Sheet: Tabelle1
						Δ %Ox (siNrx vs siCtrl)
	protein ID		gene name	protein name	mean	STDEV	p-value
	P00505		GOT2	Aspartate aminotransferase, mitochondrial	-54.3	20.2	0.0027
	P00505		GOT2	Aspartate aminotransferase, mitochondrial	-54.2	17.5	0.0017
	P00505		GOT2	Aspartate aminotransferase, mitochondrial	-46.0	24.9	0.0122
	P17174		GOT1	Aspartate aminotransferase, cytoplasmic	-44.6	17.5	0.0041
	P60174-1		TPI1	Triosephosphate isomerase	-42.1	18.3	0.0125
	P60174-1		TPI1	Triosephosphate isomerase	-38.9	23.7	0.0385
	P60174-1		TPI1	Triosephosphate isomerase	-38.7	24.4	0.0479
	Q9Y3D6		FIS1	Mitochondrial fission 1 protein	-37.3	13.2	0.0031
	Q12926		ELAVL2	ELAV-like protein 2	-34.9	28.1	0.0461
	P60900		PSMA6	Proteasome subunit alpha type-6	-31.4	17.8	0.0238
	P60174-1		TPI1	Triosephosphate isomerase	-29.4	15.9	0.0245
	P10155		TROVE2	60 kDa SS-A/Ro ribonucleoprotein	-27.1	13.8	0.0220
	Q9Y3B3-2		TMED7	Transmembrane emp24 domain-containing protein 7	-26.5	10.2	0.0045
	P00505		GOT2	Aspartate aminotransferase, mitochondrial	-24.6	14.1	0.0174
	P63167		DYNLL1	Dynein light chain 1, cytoplasmic	-23.1	13.2	0.0177
	P54687-4		BCAT1	Branched-chain-amino-acid aminotransferase, cytosolic	-20.1	16.5	0.0440
	Q12904		AIMP1	Aminoacyl tRNA synthase complex-interacting multifunctional protein 1	-19.8	8.3	0.0053
	P14678-2		SNRPB	Small nuclear ribonucleoprotein-associated proteins B and B	-14.9	6.9	0.0069
	P30405		PPIF	Peptidyl-prolyl cis-trans isomerase F, mitochondrial	-14.8	9.6	0.0376
	Q9NSE4		IARS2	Isoleucine--tRNA ligase, mitochondrial	-14.8	12.4	0.0468
	Q9UBQ0		VPS29	Vacuolar protein sorting-associated protein 29	-14.3	12.1	0.0464
	Q00325-2		SLC25A3	Phosphate carrier protein, mitochondrial	-14.0	5.3	0.0030
	P14678-2		SNRPB	Small nuclear ribonucleoprotein-associated proteins B and B	-13.7	9.4	0.0242
	Q9H6Z4-3		RANBP3	Ran-binding protein 3	-12.8	8.0	0.0310
	P62829		RPL23	60S ribosomal protein L23	-12.6	4.3	0.0053
	P51659-3		HSD17B4	Peroxisomal multifunctional enzyme type 2	-12.5	7.3	0.0145
	P48444		ARCN1	Coatomer subunit delta	-12.0	7.0	0.0178
	P12236		SLC25A6	ADP/ATP translocase 3	-12.0	8.1	0.0416
	P61970		NUTF2	Nuclear transport factor 2	-11.9	8.0	0.0480
	P12955		PEPD	Xaa-Pro dipeptidase	-11.8	3.5	0.0043
	P62987		UBA52	Ubiquitin-60S ribosomal protein L40	-11.4	5.5	0.0070
	P61964		WDR5	WD repeat-containing protein 5	-11.2	7.3	0.0227
	P21333-2		FLNA	Filamin-A	-10.6	7.2	0.0245
	P54136		RARS	Arginine--tRNA ligase, cytoplasmic	-10.6	6.5	0.0336
	P25490		YY1	Transcriptional repressor protein YY1	-10.1	4.2	0.0042
	P12268		IMPDH2	Inosine-5-monophosphate dehydrogenase 2	-9.9	4.7	0.0067
	Q7Z7L8		C11orf96	Uncharacterized protein C11orf96	-9.8	5.5	0.0124
	O95373		IPO7	Importin-7	-9.7	4.7	0.0081
	P39023		RPL3	60S ribosomal protein L3	-9.6	5.3	0.0140
	Q00610-2		CLTC	Clathrin heavy chain 1	-9.6	2.7	0.0037
	P62316		SNRPD2	Small nuclear ribonucleoprotein Sm D2	-9.4	5.7	0.0179
	P19525-2		EIF2AK2	Interferon-induced, double-stranded RNA-activated protein kinase	-8.7	6.4	0.0429
	Q15274		QPRT	Nicotinate-nucleotide pyrophosphorylase [carboxylating]	-8.6	2.3	0.0031
	O94776		MTA2	Metastasis-associated protein MTA2	-8.4	3.6	0.0047
	P61086-2		UBE2K	Ubiquitin-conjugating enzyme E2 K	-8.4	2.9	0.0022
	P53041		PPP5C	Serine/threonine-protein phosphatase 5	-7.8	3.2	0.0046
	P05141		SLC25A5	ADP/ATP translocase 2	-7.7	2.5	0.0018
	P37837		TALDO1	Transaldolase	-7.7	2.9	0.0045
	Q9NPE3		NOP10	H/ACA ribonucleoprotein complex subunit 3	-7.4	5.2	0.0373
	P19793		RXRA	Retinoic acid receptor RXR-alpha	-7.4	5.5	0.0374
	Q00610-2		CLTC	Clathrin heavy chain 1	-7.2	2.1	0.0014
	P62136		PPP1CA	Serine/threonine-protein phosphatase PP1-alpha catalytic subunit	-7.0	2.2	0.0015
	P04075		ALDOA	Fructose-bisphosphate aldolase A	-6.8	4.4	0.0350
	P78347-2		GTF2I	General transcription factor II-I	-6.8	2.4	0.0022
	P78371		CCT2	T-complex protein 1 subunit beta	-6.8	3.7	0.0330
	Q15369		TCEB1	Transcription elongation factor B polypeptide 1	-6.8	2.9	0.0045
	Q9H0D6-2		XRN2	5-3 exoribonuclease 2	-6.8	2.1	0.0023
	P62136		PPP1CA	Serine/threonine-protein phosphatase PP1-alpha catalytic subunit	-6.7	2.1	0.0015
	P50579-2		METAP2	Methionine aminopeptidase 2	-6.7	2.1	0.0016
	Q7L0Y3		TRMT10C	Mitochondrial ribonuclease P protein 1	-6.5	3.3	0.0084
	Q08945		SSRP1	FACT complex subunit SSRP1	-6.5	4.7	0.0317
	Q9Y5B9		SUPT16H	FACT complex subunit SPT16	-6.3	4.6	0.0333
	P12236		SLC25A6	ADP/ATP translocase 3	-6.3	2.1	0.0021
	P55060-3		CSE1L	Exportin-2	-6.1	4.8	0.0435
	P49588		AARS	Alanine--tRNA ligase, cytoplasmic	-6.0	1.1	0.0002
	P53041		PPP5C	Serine/threonine-protein phosphatase 5	-5.8	2.8	0.0140
	Q06830		PRDX1	Peroxiredoxin-1	-2.8	1.7	0.0478
	Q9NRP0		OSTC	Oligosaccharyltransferase complex subunit OSTC	-5.7	4.3	0.0324
	Q15061		WDR43	WD repeat-containing protein 43	-5.7	3.3	0.0164
	Q99714		HSD17B10	3-hydroxyacyl-CoA dehydrogenase type-2	-5.6	2.4	0.0063
	Q9UIA9		XPO7	Exportin-7	-5.4	3.7	0.0243
	Q16799-3		RTN1	Reticulon-1	-5.4	2.9	0.0161
	Q16658		FSCN1	Fascin	-5.3	2.9	0.0174
	Q92973-2		TNPO1	Transportin-1	-5.3	2.3	0.0046
	Q04760-2		GLO1	Lactoylglutathione lyase	-5.2	2.8	0.0111
	P62633-2		CNBP	Cellular nucleic acid-binding protein	-5.2	3.5	0.0245
	Q13561		DCTN2	Dynactin subunit 2	-5.1	3.5	0.0252
	P12236		SLC25A6	ADP/ATP translocase 3	-5.0	2.1	0.0062
	O94760		DDAH1	N(G),N(G)-dimethylarginine dimethylaminohydrolase 1	-5.0	3.8	0.0493
	P62136		PPP1CA	Serine/threonine-protein phosphatase PP1-alpha catalytic subunit	-5.0	2.5	0.0126
	P18754		RCC1	Regulator of chromosome condensation	-4.9	3.6	0.0316
	P14618		PKM	Pyruvate kinase PKM	-4.9	1.9	0.0039
	O43617		TRAPPC3	Trafficking protein particle complex subunit 3	-4.8	2.3	0.0225
	P23921		RRM1	Ribonucleoside-diphosphate reductase large subunit	-4.7	4.1	0.0489
	P49736		MCM2	DNA replication licensing factor MCM2	-4.7	2.0	0.0060
	P52701		MSH6	DNA mismatch repair protein Msh6	-4.6	3.0	0.0255
	P62424		RPL7A	60S ribosomal protein L7a	-4.6	2.6	0.0200
	Q16881-5		TXNRD1	Thioredoxin reductase 1, cytoplasmic	-5.2	3.3	0.0284
	P00390-2		GSR	Glutathione reductase, mitochondrial	-4.6	3.5	0.0466
	Q99714		HSD17B10	3-hydroxyacyl-CoA dehydrogenase type-2	-4.5	1.2	0.0028
	Q8N3U4		STAG2	Cohesin subunit SA-2	-4.4	3.7	0.0462
	P62873		GNB1	Guanine nucleotide-binding protein G(I)/G(S)/G(T) subunit beta-1	-4.4	2.0	0.0063
	P26641		EEF1G	Elongation factor 1-gamma	-4.3	2.5	0.0176
	O15145		ARPC3	Actin-related protein 2/3 complex subunit 3	-4.2	3.1	0.0337
	P42704		LRPPRC	Leucine-rich PPR motif-containing protein, mitochondrial	-4.2	3.0	0.0403
	P61088		UBE2N	Ubiquitin-conjugating enzyme E2 N	-4.2	3.0	0.0271
	P50990		CCT8	T-complex protein 1 subunit theta	-4.1	3.1	0.0369
	P28838-2		LAP3	Cytosol aminopeptidase	-4.1	2.0	0.0243
	P67870		CSNK2B	Casein kinase II subunit beta	-4.0	2.1	0.0294
	Q9Y2Y0-2		ARL2BP	ADP-ribosylation factor-like protein 2-binding protein	-3.9	1.8	0.0075
	P46063		RECQL	ATP-dependent DNA helicase Q1	-3.9	2.3	0.0181
	O00487		PSMD14	26S proteasome non-ATPase regulatory subunit 14	-3.8	2.3	0.0161
	P36578		RPL4	60S ribosomal protein L4	-3.7	2.3	0.0279
	P04181		OAT	Ornithine aminotransferase, mitochondrial	-3.7	1.4	0.0059
	P49207		RPL34	60S ribosomal protein L34	-3.6	3.2	0.0496
	Q9H074-3		PAIP1	Polyadenylate-binding protein-interacting protein 1	-3.6	1.5	0.0149
	Q16531		DDB1	DNA damage-binding protein 1	-3.6	2.8	0.0495
	P52292		KPNA2	Importin subunit alpha-1	-3.6	1.5	0.0049
	P46782		RPS5	40S ribosomal protein S5	-3.6	2.8	0.0459
	P11310		ACADM	Medium-chain specific acyl-CoA dehydrogenase, mitochondrial	-3.5	1.5	0.0155
	P62873		GNB1	Guanine nucleotide-binding protein G(I)/G(S)/G(T) subunit beta-1	-3.5	2.8	0.0430
	Q16658		FSCN1	Fascin	-3.5	2.6	0.0317
	Q96QK1		VPS35	Vacuolar protein sorting-associated protein 35	-3.5	1.1	0.0016
	O94760		DDAH1	N(G),N(G)-dimethylarginine dimethylaminohydrolase 1	-3.5	2.3	0.0315
	P13639		EEF2	Elongation factor 2	-3.4	0.5	0.0001
	P04406		GAPDH	Glyceraldehyde-3-phosphate dehydrogenase	-3.4	2.4	0.0310
	P61247		RPS3A	40S ribosomal protein S3a	-3.3	2.4	0.0362
	P14618		PKM	Pyruvate kinase PKM	-3.3	1.5	0.0109
	P07900		HSP90AA1	Heat shock protein HSP 90-alpha	-3.3	2.7	0.0417
	P62937		PPIA	Peptidyl-prolyl cis-trans isomerase A	-3.3	1.9	0.0205
	O43252		PAPSS1	Bifunctional 3-phosphoadenosine 5-phosphosulfate synthase 1	-3.2	1.9	0.0303
	O14979-3		HNRPDL	Heterogeneous nuclear ribonucleoprotein D-like	-3.1	2.0	0.0202
	O60884		DNAJA2	DnaJ homolog subfamily A member 2	-3.1	2.3	0.0387
	P49419-2		ALDH7A1	Alpha-aminoadipic semialdehyde dehydrogenase	-3.0	1.4	0.0226
	Q99536		VAT1	Synaptic vesicle membrane protein VAT-1 homolog	-2.9	1.1	0.0031
	P21333-2		FLNA	Filamin-A	-2.9	1.4	0.0206
	Q9Y3B2		EXOSC1	Exosome complex component CSL4	-2.9	1.3	0.0053
	P51991		HNRNPA3	Heterogeneous nuclear ribonucleoprotein A3	-2.8	1.2	0.0069
	Q7KZF4		SND1	Staphylococcal nuclease domain-containing protein 1	-2.8	0.8	0.0022
	Q16881-5		TXNRD1	Thioredoxin reductase 1, cytoplasmic	-5.8	3.9	0.0216
	P23528		CFL1	Cofilin-1	-2.8	2.2	0.0354
	Q8NCW5-2		APOA1BP	NAD(P)H-hydrate epimerase	-2.7	1.8	0.0476
	P46779		RPL28	60S ribosomal protein L28	-2.6	2.0	0.0310
	Q9Y277-2		VDAC3	Voltage-dependent anion-selective channel protein 3	-2.6	2.1	0.0397
	Q00169		PITPNA	Phosphatidylinositol transfer protein alpha isoform	-2.6	2.1	0.0446
	Q9Y5B9		SUPT16H	FACT complex subunit SPT16	-2.5	0.7	0.0030
	P21266		GSTM3	Glutathione S-transferase Mu 3	-2.5	1.5	0.0265
	P45974-2		USP5	Ubiquitin carboxyl-terminal hydrolase 5	-2.5	1.8	0.0270
	P63104		YWHAZ	14-3-3 protein zeta/delta	-2.5	1.7	0.0269
	P13489		RNH1	Ribonuclease inhibitor	-2.4	0.7	0.0017
	Q13595-2		TRA2A	Transformer-2 protein homolog alpha	-2.3	1.0	0.0161
	P78527-2		PRKDC	DNA-dependent protein kinase catalytic subunit	-2.3	1.7	0.0304
	Q9BZK7		TBL1XR1	F-box-like/WD repeat-containing protein TBL1XR1	-2.2	1.8	0.0450
	P23246		SFPQ	Splicing factor, proline- and glutamine-rich	-2.2	1.6	0.0287
	Q92769		HDAC2	Histone deacetylase 2	-2.1	1.2	0.0157
	Q9UNM6		PSMD13	26S proteasome non-ATPase regulatory subunit 13	-2.0	1.2	0.0170
	Q07866-8		KLC1	Kinesin light chain 1	-1.9	1.1	0.0145
	P36405		ARL3	ADP-ribosylation factor-like protein 3	-1.9	1.5	0.0354
	Q9NVP2		ASF1B	Histone chaperone ASF1B	-1.8	0.7	0.0134
	P07900		HSP90AA1	Heat shock protein HSP 90-alpha	-1.7	0.2	0.0003
	P49756		RBM25	RNA-binding protein 25	-1.7	0.5	0.0036
	P23526		AHCY	Adenosylhomocysteinase	-1.7	1.1	0.0344
	P09104-2		ENO2	Gamma-enolase	-1.6	0.8	0.0210
	P78371		CCT2	T-complex protein 1 subunit beta	-1.6	1.4	0.0442
	P55265-3		ADAR	Double-stranded RNA-specific adenosine deaminase	-1.6	1.3	0.0494
	Q9BVA1		TUBB2A	Tubulin beta-2A chain	-1.5	1.1	0.0291
	P50579-2		METAP2	Methionine aminopeptidase 2	-1.4	0.9	0.0388
	P45880		VDAC2	Voltage-dependent anion-selective channel protein 2	-1.4	0.3	0.0017
	P07900		HSP90AA1	Heat shock protein HSP 90-alpha	-1.4	0.6	0.0103
	P14866		HNRNPL	Heterogeneous nuclear ribonucleoprotein L	-1.1	0.5	0.0090
	Q71U36-2		TUBA1A	Tubulin alpha-1A chain	-0.5	0.3	0.0216
	P14618		PKM	Pyruvate kinase PKM	2.7	0.6	0.0016
	P54577		YARS	Tyrosine--tRNA ligase, cytoplasmic	3.3	1.5	0.0216
	P39023		RPL3	60S ribosomal protein L3	5.7	3.2	0.0238
	P67775		PPP2CB	Serine/threonine-protein phosphatase 2A catalytic subunit beta isoform	6.6	4.5	0.0258
	Q09161		NCBP1	Nuclear cap-binding protein subunit 1	6.7	0.7	0.0001
	P62633-2		CNBP	Cellular nucleic acid-binding protein	8.0	5.2	0.0218
	Q16181-2		39326	Septin-7	8.9	4.3	0.0235
	P78417-2		GSTO1	Glutathione S-transferase omega-1	13.4	10.9	0.0392
	P49207		RPL34	60S ribosomal protein L34	14.3	2.9	0.0003
	P55209-2		NAP1L1	Nucleosome assembly protein 1-like 1	29.2	13.8	0.0067
