# Supplementary material for: Nucleoredoxin-Dependent Targets and Processes in Neuronal Cells
Source: Oxid Med Cell Longev. 2018 Nov 21;2018:4829872. doi: 10.1155/2018/4829872 (PMC6280245; doi:10.1155/2018/4829872)
Supplement: Supplementary 3 — This list shows 58 cysteine-containing proteins whose abundance is significantly changed (p value < 0.5) in SH-SY5Y cells lacking Nrx. The proteins were identified using the differential labeling approach with one iodoTMT™ label and a completely reduced proteome due to addition of the reductant TCEP. [file 4829872.f3.xlsx]

## Sheet: Tabelle1
						Fold change siNrx vs siCtrl
	protein ID		gene name	protein name	Log2 ratio mean	STDEV	p-value
	P25325		MPST	3-mercaptopyruvate sulfurtransferase	0.6	0.3	0.0118
	P35520		CBS	Cystathionine beta-synthase	0.6	0.3	0.0060
	P35580		MYH10	Myosin-10	0.6	0.3	0.0153
	P04040		CAT	Catalase	0.5	0.2	0.0148
	Q06124-3		PTPN11	Tyrosine-protein phosphatase non-receptor type 11	0.4	0.2	0.0139
	P31350		RRM2	Ribonucleoside-diphosphate reductase subunit M2	0.4	0.2	0.0181
	Q5BKZ1-3		ZNF326	DBIRD complex subunit ZNF326	0.4	0.3	0.0434
	Q05193-5		DNM1	Dynamin-1	0.4	0.3	0.0424
	Q92576-2		PHF3	PHD finger protein 3	0.4	0.3	0.0283
	Q9UL42		PNMA2	Paraneoplastic antigen Ma2	0.4	0.2	0.0136
	Q02790		FKBP4	Peptidyl-prolyl cis-trans isomerase FKBP4	0.4	0.2	0.0254
	P49321		NASP	Nuclear autoantigenic sperm protein	0.3	0.2	0.0228
	P43487-2		RANBP1	Ran-specific GTPase-activating protein	0.3	0.2	0.0172
	P33316-2		DUT	Deoxyuridine 5-triphosphate nucleotidohydrolase, mitochondrial	0.3	0.2	0.0333
	P46109		CRKL	Crk-like protein	0.3	0.2	0.0212
	P04899		GNAI2	Guanine nucleotide-binding protein G(i) subunit alpha-2	0.3	0.2	0.0283
	Q9NVP2		ASF1B	Histone chaperone ASF1B	0.3	0.2	0.0456
	P28482-2		MAPK1	Mitogen-activated protein kinase 1	0.3	0.2	0.0483
	Q9Y508		RNF114	RING finger protein 114	0.3	0.2	0.0420
	Q4G0F5		VPS26B	Vacuolar protein sorting-associated protein 26B	0.3	0.2	0.0454
	Q9NRX4-2		PHPT1	14 kDa phosphohistidine phosphatase	0.2	0.1	0.0168
	P21266		GSTM3	Glutathione S-transferase Mu 3	0.2	0.2	0.0432
	Q9P1U0		ZNRD1	DNA-directed RNA polymerase I subunit RPA12	0.2	0.1	0.0191
	O75347		TBCA	Tubulin-specific chaperone A	0.2	0.2	0.0491
	P00492		HPRT1	Hypoxanthine-guanine phosphoribosyltransferase	0.2	0.1	0.0223
	Q8WUW1		BRK1	Protein BRICK1	0.1	0.1	0.0324
	O95983-2		MBD3	Methyl-CpG-binding domain protein 3	0.1	0.0	0.0023
	O76003		GLRX3	Glutaredoxin-3	0.1	0.1	0.0486
	Q9UP95-4		SLC12A4	Solute carrier family 12 member 4	-0.1	0.1	0.0329
	Q14980-2		NUMA1	Nuclear mitotic apparatus protein 1	-0.2	0.1	0.0459
	Q15631		TSN	Translin	-0.2	0.1	0.0476
	O75688-5		PPM1B	Protein phosphatase 1B	-0.2	0.2	0.0361
	O00148		DDX39A	ATP-dependent RNA helicase DDX39A	-0.2	0.2	0.0191
	Q86TI2-4		DPP9	Dipeptidyl peptidase 9	-0.3	0.2	0.0338
	Q1KMD3		HNRNPUL2	Heterogeneous nuclear ribonucleoprotein U-like protein 2	-0.3	0.2	0.0161
	P62750		RPL23A	60S ribosomal protein L23a	-0.3	0.1	0.0060
	O94760		DDAH1	N(G),N(G)-dimethylarginine dimethylaminohydrolase 1	-0.3	0.2	0.0128
	P60891		PRPS1	Ribose-phosphate pyrophosphokinase 1	-0.3	0.2	0.0360
	P05023-3		ATP1A1	Sodium/potassium-transporting ATPase subunit alpha-1	-0.3	0.2	0.0335
	Q00169		PITPNA	Phosphatidylinositol transfer protein alpha isoform	-0.3	0.2	0.0455
	Q9C004		SPRY4	Protein sprouty homolog 4	-0.3	0.2	0.0442
	O43707		ACTN4	Alpha-actinin-4	-0.3	0.2	0.0249
	Q9UHB6		LIMA1	LIM domain and actin-binding protein 1	-0.3	0.2	0.0081
	P51784		USP11	Ubiquitin carboxyl-terminal hydrolase 11	-0.3	0.3	0.0497
	Q92499		DDX1	ATP-dependent RNA helicase DDX1	-0.4	0.2	0.0137
	Q53EL6-2		PDCD4	Programmed cell death protein 4	-0.4	0.3	0.0488
	Q14141-2		SEPT6	Septin-6	-0.4	0.2	0.0179
	A6NKG5		RTL1	Retrotransposon-like protein 1	-0.4	0.3	0.0260
	Q96QR8		PURB	Transcriptional activator protein Pur-beta	-0.5	0.3	0.0221
	Q96RS6		NUDCD1	NudC domain-containing protein 1	-0.5	0.3	0.0198
	P62834		RAP1A	Ras-related protein Rap-1A	-0.5	0.4	0.0326
	Q53GQ0		HSD17B12	Estradiol 17-beta-dehydrogenase 12	-0.5	0.4	0.0422
	P09172		DBH	Dopamine beta-hydroxylase	-0.6	0.4	0.0315
	P07339		CTSD	Cathepsin D	-0.7	0.4	0.0206
	P45954-2		ACADSB	Short/branched chain specific acyl-CoA dehydrogenase, mitochondrial	-0.7	0.4	0.0231
	P42574		CASP3	Caspase-3	-0.7	0.3	0.0079
	P07858		CTSB	Cathepsin B	-0.8	0.4	0.0065
	P14314-2		PRKCSH	Glucosidase 2 subunit beta	-1.2	1.0	0.0460
