# Supplementary material for: Nucleoredoxin-Dependent Targets and Processes in Neuronal Cells
Source: Oxid Med Cell Longev. 2018 Nov 21;2018:4829872. doi: 10.1155/2018/4829872 (PMC6280245; doi:10.1155/2018/4829872)
Supplement: Supplementary 4 — Listed are 609 potential Nrx interaction partners that were identified with the intermediate trapping approach using mNrxC208S and SH-SY5Y extracts. Included are proteins, where at least two positive iBAQ (intensity-based absolute quantification) values were recorded. The iBAQ corresponds to the sum of all the peptide intensities divided by the number of observable peptides of a protein. [file 4829872.f4.xlsx]

## Sheet: Tabelle1
	protein ID	gene name	protein name	iBAQ 1D-Lane1	iBAQ 1D-Lane2	iBAQ Gel-free
	P68371	TUBB4B	Tubulin beta-4B chain	3576900	964360	359450000
	Q71U36-2	TUBA1A	Tubulin alpha-1A chain	5589400	1603300	251870000
	Q6DKJ4	NXN	Nucleoredoxin	2954600	665700	237880000
	P23528	CFL1	Cofilin-1	732230	252470	101960000
	P07437	TUBB	Tubulin beta chain	4389900	857420	101070000
	P11142	HSPA8	Heat shock cognate 71 kDa protein	6890200	686360	89537000
	P63261	ACTG1	Actin, cytoplasmic 2	2036100	596600	85957000
	P06733	ENO1	Alpha-enolase	548160	151620	80607000
	P61956-2	SUMO2	Small ubiquitin-related modifier 2	381110	45042	61248000
	P08238	HSP90AB1	Heat shock protein HSP 90-beta	7111300	734610	57974000
	P00338	LDHA	L-lactate dehydrogenase A chain	276360	82017	41233000
	P07195	LDHB	L-lactate dehydrogenase B chain	165420	76440	40499000
	P60174-1	TPI1	Triosephosphate isomerase	224710	14701	36686000
	P10809	HSPD1	60 kDa heat shock protein, mitochondrial	714420	57750	32870000
	P62937	PPIA	Peptidyl-prolyl cis-trans isomerase A	292980	51953	31469000
	P10599	TXN	Thioredoxin	348370	51935	29749000
	Q9BVA1	TUBB2B	Tubulin beta-2B chain	601920	112870	29371000
	P07737	PFN1	Profilin-1	37500	17744	28156000
	P52565	ARHGDIA	Rho GDP-dissociation inhibitor 1	66973	10872	25466000
	P16949	STMN1	Stathmin	338730	92982	24921000
	P04406	GAPDH	Glyceraldehyde-3-phosphate dehydrogenase	57667	9275.6	23114000
	P12277	CKB	Creatine kinase B-type	178020	85539	22625000
	P22392-2	NME2	Nucleoside diphosphate kinase B	1798.1	0	22191000
	P62158	CALM1	Calmodulin	9064.8	0	21793000
	P00558	PGK1	Phosphoglycerate kinase 1	215760	62047	21462000
	P06744	GPI	Glucose-6-phosphate isomerase	193190	10404	21098000
	Q13509	TUBB3	Tubulin beta-3 chain	86119	21543	21046000
	O43175	PHGDH	D-3-phosphoglycerate dehydrogenase	374450	18888	19619000
	Q06830	PRDX1	Peroxiredoxin-1	385600	13795	18022000
	P27348	YWHAQ	14-3-3 protein theta	48263	11036	17567000
	P32119	PRDX2	Peroxiredoxin-2	160490	14170	17525000
	P04075	ALDOA	Fructose-bisphosphate aldolase A	68823	20047	15959000
	P31150	GDI1	Rab GDP dissociation inhibitor alpha	144020	0	15784000
	Q16658	FSCN1	Fascin	409850	8486.6	15780000
	P07900	HSP90AA1	Heat shock protein HSP 90-alpha	2354100	223130	15119000
	P04792	HSPB1	Heat shock protein beta-1	27496	0	14565000
	Q5VTE0	EEF1A1P5	Putative elongation factor 1-alpha-like 3	230470	51121	14048000
	P11021	HSPA5	78 kDa glucose-regulated protein	1040700	92482	13900000
	P63104	YWHAZ	14-3-3 protein zeta/delta	82659	15161	13819000
	P62987	UBA52	Ubiquitin-60S ribosomal protein L40	1423600	190430	13574000
	P61604	HSPE1	10 kDa heat shock protein, mitochondrial	5486.6	0	13245000
	Q16555	DPYSL2	Dihydropyrimidinase-related protein 2	632680	50853	12819000
	P09455	RBP1	Retinol-binding protein 1	0	3843.8	12773000
	Q99497	PARK7	Protein DJ-1	32591	0	12724000
	P13639	EEF2	Elongation factor 2	365480	14832	12718000
	P12004	PCNA	Proliferating cell nuclear antigen	100600	13764	12687000
	P08107	HSPA1A	Heat shock 70 kDa protein 1A/1B	742360	87432	12279000
	Q00610-2	CLTC	Clathrin heavy chain 1	108860	13713	12273000
	Q93045	STMN2	Stathmin-2	47179	100810	12004000
	P09172	DBH	Dopamine beta-hydroxylase	212080	8691.6	11839000
	P09936	UCHL1	Ubiquitin carboxyl-terminal hydrolase isozyme L1	125600	0	11261000
	P14625	HSP90B1	Endoplasmin	1172900	68692	11223000
	P31946	YWHAB	14-3-3 protein beta/alpha	104330	8956.7	11203000
	P14618-2	PKM	Pyruvate kinase PKM	249690	25258	11070000
	P09496-2	CLTA	Clathrin light chain A	4867.3	0	9881000
	P30044-2	PRDX5	Peroxiredoxin-5, mitochondrial	4543.8	0	9784200
	P29401	TKT	Transketolase	250180	5475.9	9443100
	P40926	MDH2	Malate dehydrogenase, mitochondrial	49253	10600	8814700
	Q15084-3	PDIA6	Protein disulfide-isomerase A6	45264	5258	8753300
	P38646	HSPA9	Stress-70 protein, mitochondrial	757320	52000	8534600
	P17066	HSPA6	Heat shock 70 kDa protein 6	622380	105840	8010800
	P61981	YWHAG	14-3-3 protein gamma	30752	8335	7740400
	Q9Y5Y2	NUBP2	Cytosolic Fe-S cluster assembly factor NUBP2	32671	5285.1	7521600
	P62258	YWHAE	14-3-3 protein epsilon	35800	13371	7230200
	Q00839	HNRNPU	Heterogeneous nuclear ribonucleoprotein U	116340	17586	7057700
	P30101	PDIA3	Protein disulfide-isomerase A3	81773	2698.3	6974500
	P41250	GARS	Glycine--tRNA ligase	86069	8129	6799400
	O15240	VGF	Neurosecretory protein VGF	242190	8564	5815200
	P23526	AHCY	Adenosylhomocysteinase	42396	8559.6	5736200
	P00441	SOD1	Superoxide dismutase [Cu-Zn]	9148.6	5836.7	5702400
	P22314-2	UBA1	Ubiquitin-like modifier-activating enzyme 1	110970	15333	5436300
	P62826	RAN	GTP-binding nuclear protein Ran	33962	4521.1	5435300
	P40925	MDH1	Malate dehydrogenase, cytoplasmic	37198	5512.1	5417900
	Q562R1	ACTBL2	Beta-actin-like protein 2	0	5103	4854100
	P60842	EIF4A1	Eukaryotic initiation factor 4A-I	23934	9060.1	4744500
	Q14697	GANAB	Neutral alpha-glucosidase AB	235150	8051.7	4630400
	P22234	PAICS	Multifunctional protein ADE2	146290	26556	4338400
	Q9NRR5	UBQLN4	Ubiquilin-4	37835	8708.6	4335600
	P17987	TCP1	T-complex protein 1 subunit alpha	45469	0	4269300
	P06753-2	TPM3	Tropomyosin alpha-3 chain	15922	0	4264600
	Q99714	HSD17B10	3-hydroxyacyl-CoA dehydrogenase type-2	16185	0	4252400
	P14174	MIF	Macrophage migration inhibitory factor	38160	22798	4235800
	P09104-2	ENO2	Gamma-enolase	55432	13607	4030400
	P78371	CCT2	T-complex protein 1 subunit beta	76949	0	3944500
	P48643	CCT5	T-complex protein 1 subunit epsilon	68317	3129.2	3904800
	P50990	CCT8	T-complex protein 1 subunit theta	190250	3065.7	3698200
	P37802	TAGLN2	Transgelin-2	6812.3	3461.3	3653600
	P63241	EIF5A	Eukaryotic translation initiation factor 5A-1	15171	0	3559200
	P49327	FASN	Fatty acid synthase	52976	0	3558300
	P28066	PSMA5	Proteasome subunit alpha type-5	17065	0	3498100
	P30041	PRDX6	Peroxiredoxin-6	16024	0	3428300
	P50395	GDI2	Rab GDP dissociation inhibitor beta	16151	3807.3	3386000
	P27797	CALR	Calreticulin	298260	26408	3376800
	P51858	HDGF	Hepatoma-derived growth factor	21771	3643.5	3186600
	P52209-2	PGD	6-phosphogluconate dehydrogenase, decarboxylating	15727	8250.1	3140300
	P50991	CCT4	T-complex protein 1 subunit delta	77896	0	3139200
	P15121	AKR1B1	Aldose reductase	3838.2	0	3084500
	P28072	PSMB6	Proteasome subunit beta type-6	43966	0	3002900
	O95433	AHSA1	Activator of 90 kDa heat shock protein ATPase homolog 1	13493	5470	2990500
	P49368	CCT3	T-complex protein 1 subunit gamma	50268	0	2983400
	Q13263	TRIM28	Transcription intermediary factor 1-beta	184660	10093	2957300
	Q99832	CCT7	T-complex protein 1 subunit eta	45618	0	2927000
	P40227	CCT6A	T-complex protein 1 subunit zeta	118740	0	2911600
	P28070	PSMB4	Proteasome subunit beta type-4	13182	0	2878100
	P31948	STIP1	Stress-induced-phosphoprotein 1	295930	16920	2863000
	P45974-2	USP5	Ubiquitin carboxyl-terminal hydrolase 5	90506	3967.6	2778400
	P55209-2	NAP1L1	Nucleosome assembly protein 1-like 1	7303.5	0	2764500
	P10645	CHGA	Chromogranin-A	17792	0	2714700
	Q9UBS4	DNAJB11	DnaJ homolog subfamily B member 11	53881	26160	2707100
	Q14194-2	CRMP1	Dihydropyrimidinase-related protein 1	90573	0	2692800
	Q15181	PPA1	Inorganic pyrophosphatase	9732.6	2018	2683400
	Q9Y265	RUVBL1	RuvB-like 1	104410	0	2671100
	P07858	CTSB	Cathepsin B	8107	0	2670300
	P58546	MTPN	Myotrophin	0	7243.8	2666000
	Q02790	FKBP4	Peptidyl-prolyl cis-trans isomerase FKBP4	224720	5853.7	2599600
	P14314-2	PRKCSH	Glucosidase 2 subunit beta	123140	0	2549000
	O00154-6	ACOT7	Cytosolic acyl coenzyme A thioester hydrolase	53604	16592	2421500
	Q13885	TUBB2A	Tubulin beta-2A chain	49849	9319.1	2403300
	P07237	P4HB	Protein disulfide-isomerase	105800	0	2402500
	P17980	PSMC3	26S protease regulatory subunit 6A	9374.2	1534.7	2395400
	Q92598-2	HSPH1	Heat shock protein 105 kDa	80904	14256	2386200
	P31153	MAT2A	S-adenosylmethionine synthase isoform type-2	31700	9994	2345300
	P20618	PSMB1	Proteasome subunit beta type-1	10017	0	2337900
	P60953	CDC42	Cell division control protein 42 homolog	12136	0	2305100
	Q01518	CAP1	Adenylyl cyclase-associated protein 1	81275	0	2277800
	Q9HB71	CACYBP	Calcyclin-binding protein	5974.5	0	2214400
	P30086	PEBP1	Phosphatidylethanolamine-binding protein 1	17220	14516	2195400
	Q99426-2	TBCB	Tubulin-folding cofactor B	26928	0	2185800
	Q9BPU6	DPYSL5	Dihydropyrimidinase-related protein 5	144450	1737.2	2163000
	P52597	HNRNPF	Heterogeneous nuclear ribonucleoprotein F	60482	14050	2156200
	Q13257	MAD2L1	Mitotic spindle assembly checkpoint protein MAD2A	3755	0	2125700
	P55072	VCP	Transitional endoplasmic reticulum ATPase	224800	6950.3	2122400
	Q92734-2	TFG	Protein TFG	50296	0	2121200
	P09972	ALDOC	Fructose-bisphosphate aldolase C	17906	5604.8	2098000
	P49720	PSMB3	Proteasome subunit beta type-3	9059.9	0	2086100
	Q9Y617	PSAT1	Phosphoserine aminotransferase	10392	0	2084400
	Q9UHD9	UBQLN2	Ubiquilin-2	39716	0	2081900
	P34932	HSPA4	Heat shock 70 kDa protein 4	125610	15873	2072400
	Q8N163	KIAA1967	DBIRD complex subunit KIAA1967	74126	16343	2062800
	Q13765	NACA	Nascent polypeptide-associated complex subunit alpha	24077	0	2050600
	O00299	CLIC1	Chloride intracellular channel protein 1	13553	2941.2	1979900
	Q16543	CDC37	Hsp90 co-chaperone Cdc37	84454	22266	1935800
	P04350	TUBB4A	Tubulin beta-4A chain	21475	0	1924900
	P61088	UBE2N	Ubiquitin-conjugating enzyme E2 N	0	4985.4	1905700
	Q9Y230	RUVBL2	RuvB-like 2	55703	0	1856200
	O94760	DDAH1	N(G),N(G)-dimethylarginine dimethylaminohydrolase 1	18879	0	1840700
	Q99873-3	PRMT1	Protein arginine N-methyltransferase 1	4341.3	3356.3	1821400
	P08865	RPSA	40S ribosomal protein SA	14591	3777.5	1812000
	Q86X55-1	CARM1	Histone-arginine methyltransferase CARM1	25390	0	1779700
	P46821	MAP1B	Microtubule-associated protein 1B	53828	0	1776900
	P08243-2	ASNS	Asparagine synthetase [glutamine-hydrolyzing]	83548	0	1772200
	O14818	PSMA7	Proteasome subunit alpha type-7	3129	0	1766100
	P13667	PDIA4	Protein disulfide-isomerase A4	183310	14700	1758300
	P54727	RAD23B	UV excision repair protein RAD23 homolog B	28798	0	1710600
	Q13162	PRDX4	Peroxiredoxin-4	9122.2	0	1687000
	Q9BWD1	ACAT2	Acetyl-CoA acetyltransferase, cytosolic	11722	3100.8	1667800
	Q13409-6	DYNC1I2	Cytoplasmic dynein 1 intermediate chain 2	165290	5162.2	1666300
	P06576	ATP5B	ATP synthase subunit beta, mitochondrial	10348	0	1641200
	P26641	EEF1G	Elongation factor 1-gamma	21368	2290.1	1622100
	P33993	MCM7	DNA replication licensing factor MCM7	66573	962.8	1602800
	Q14195-2	DPYSL3	Dihydropyrimidinase-related protein 3	72165	1345.8	1575100
	P17174	GOT1	Aspartate aminotransferase, cytoplasmic	2995	0	1569800
	Q9UHV9	PFDN2	Prefoldin subunit 2	0	3426.8	1567800
	Q9UJU6	DBNL	Drebrin-like protein	53282	0	1554800
	P25788-2	PSMA3	Proteasome subunit alpha type-3	24770	3569	1539900
	P05091	ALDH2	Aldehyde dehydrogenase, mitochondrial	15220	0	1518900
	P19338	NCL	Nucleolin	93101	2580	1511100
	P47914	RPL29	60S ribosomal protein L29	35342	0	1494000
	P00505	GOT2	Aspartate aminotransferase, mitochondrial	10768	3724.6	1477200
	A6NKG5	RTL1	Retrotransposon-like protein 1	26149	2631.5	1441600
	Q15365	PCBP1	Poly(rC)-binding protein 1	46027	2425.9	1425100
	P50502	ST13	Hsc70-interacting protein	29674	0	1408000
	Q14974	KPNB1	Importin subunit beta-1	32648	0	1402900
	Q9Y4L1	HYOU1	Hypoxia up-regulated protein 1	10960	2991.8	1382400
	P07954-2	FH	Fumarate hydratase, mitochondrial	35824	7097.4	1378800
	Q13011	ECH1	Delta(3,5)-Delta(2,4)-dienoyl-CoA isomerase, mitochondrial	14712	1899.6	1357500
	P49721	PSMB2	Proteasome subunit beta type-2	9752.3	0	1314600
	Q9H3K6	BOLA2	BolA-like protein 2	8642.9	0	1297800
	P61163	ACTR1A	Alpha-centractin	33642	3540.9	1297200
	Q14204	DYNC1H1	Cytoplasmic dynein 1 heavy chain 1	8857.8	0	1280400
	P67809	YBX1	Nuclease-sensitive element-binding protein 1	105080	16062	1279100
	P00492	HPRT1	Hypoxanthine-guanine phosphoribosyltransferase	23679	0	1263500
	P07339	CTSD	Cathepsin D	1794.2	0	1228600
	P55060-3	CSE1L	Exportin-2	8563	0	1218300
	O95831-3	AIFM1	Apoptosis-inducing factor 1, mitochondrial	82959	5328.2	1200100
	P84098	RPL19	60S ribosomal protein L19	33218	5738.5	1183300
	P36871	PGM1	Phosphoglucomutase-1	9091	0	1164700
	P23381	WARS	Tryptophan--tRNA ligase, cytoplasmic	20983	0	1161000
	P49321	NASP	Nuclear autoantigenic sperm protein	36323	0	1152700
	P61978-3	HNRNPK	Heterogeneous nuclear ribonucleoprotein K	47317	0	1149900
	O75083	WDR1	WD repeat-containing protein 1	27937	0	1143800
	P37837	TALDO1	Transaldolase	3279.3	0	1119900
	Q93079	HIST1H2BH	Histone H2B type 1-H	0	140040	1108000
	P55036	PSMD4	26S proteasome non-ATPase regulatory subunit 4	17999	0	1098800
	Q9UBE0	SAE1	SUMO-activating enzyme subunit 1	44336	3813.9	1075600
	P62899	RPL31	60S ribosomal protein L31	74169	24445	1074400
	P12955	PEPD	Xaa-Pro dipeptidase	63741	0	1061700
	Q9NPH2-2	ISYNA1	Inositol-3-phosphate synthase 1	41634	0	1057500
	P62280	RPS11	40S ribosomal protein S11	16680	3252.1	1037000
	O75688	PPM1B	Protein phosphatase 1B	81148	8036.9	1032300
	Q99733	NAP1L4	Nucleosome assembly protein 1-like 4	35997	0	1020100
	P21281	ATP6V1B2	V-type proton ATPase subunit B, brain isoform	67505	0	1010300
	P83731	RPL24	60S ribosomal protein L24	13625	0	1001200
	Q9Y266	NUDC	Nuclear migration protein nudC	44601	5267.6	985290
	Q16881-5	TXNRD1	Thioredoxin reductase 1, cytoplasmic	15984	0	983900
	P00568	AK1	Adenylate kinase isoenzyme 1	6041.5	0	981070
	P42704	LRPPRC	Leucine-rich PPR motif-containing protein, mitochondrial	13228	2463.5	969210
	Q12765	SCRN1	Secernin-1	99719	5908	968980
	P20711-3	DDC	Aromatic-L-amino-acid decarboxylase	36759	0	950780
	Q02878	RPL6	60S ribosomal protein L6	4741.4	2639.3	943150
	Q15102	PAFAH1B3	Platelet-activating factor acetylhydrolase IB subunit gamma	10609	0	936140
	Q09028-3	RBBP4	Histone-binding protein RBBP4	82471	0	929840
	Q14566	MCM6	DNA replication licensing factor MCM6	123360	0	926630
	Q14247	CTTN	Src substrate cortactin	64320	0	910320
	P25786	PSMA1	Proteasome subunit alpha type-1	0	4537	903610
	P48735	IDH2	Isocitrate dehydrogenase [NADP], mitochondrial	4727.3	2867.3	901290
	Q9Y6Y8	SEC23IP	SEC23-interacting protein	13142	1520.8	901100
	Q99829	CPNE1	Copine-1	13135	0	899740
	P63244	GNB2L1	Guanine nucleotide-binding protein subunit beta-2-like 1	9632.8	0	890230
	P35520	CBS	Cystathionine beta-synthase	30870	0	888690
	Q15645	TRIP13	Pachytene checkpoint protein 2 homolog	6261.8	0	878170
	P49411	TUFM	Elongation factor Tu, mitochondrial	28623	4616.9	841370
	Q9UMX0	UBQLN1	Ubiquilin-1	33354	14749	831460
	Q9Y3F4	STRAP	Serine-threonine kinase receptor-associated protein	3015.3	0	827800
	P56537	EIF6	Eukaryotic translation initiation factor 6	11207	0	826570
	P49736	MCM2	DNA replication licensing factor MCM2	41780	11558	808520
	P31939	ATIC	Bifunctional purine biosynthesis protein PURH	24838	0	803560
	P31689	DNAJA1	DnaJ homolog subfamily A member 1	16355	4374.4	798540
	Q07020-2	RPL18	60S ribosomal protein L18	12634	0	798340
	P09417	QDPR	Dihydropteridine reductase	10334	0	785860
	P19367	HK1	Hexokinase-1	77275	9279.4	782620
	O75874	IDH1	Isocitrate dehydrogenase [NADP] cytoplasmic	6682.9	1664.4	780120
	P17812	CTPS1	CTP synthase 1	7691.8	1483.3	773220
	P62333	PSMC6	26S protease regulatory subunit 10B	3701.8	0	764520
	P22102	GART	Trifunctional purine biosynthetic protein adenosine-3	9752.4	0	762660
	O95865	DDAH2	N(G),N(G)-dimethylarginine dimethylaminohydrolase 2	5446.9	0	761530
	P51665	PSMD7	26S proteasome non-ATPase regulatory subunit 7	24118	3572.1	755070
	Q15370	TCEB2	Transcription elongation factor B polypeptide 2	11980	0	750030
	Q9UBT2	UBA2	SUMO-activating enzyme subunit 2	127100	3141.4	738970
	Q13347	EIF3I	Eukaryotic translation initiation factor 3 subunit I	26767	3535.8	735870
	P14618	PKM	Pyruvate kinase PKM	19920	0	733270
	Q9UKK9	NUDT5	ADP-sugar pyrophosphatase	14964	0	731300
	P62241	RPS8	40S ribosomal protein S8	8746.4	0	731070
	P30153	PPP2R1A	Serine/threonine-protein phosphatase 2A 65 kDa regulatory subunit A alpha isoform	8675	0	727690
	Q00796	SORD	Sorbitol dehydrogenase	9157.8	2337.1	711240
	Q92769	HDAC2	Histone deacetylase 2	13547	0	699340
	P53396-2	ACLY	ATP-citrate synthase	18955	3909.8	699220
	P35998	PSMC2	26S protease regulatory subunit 7	13306	1672.2	698580
	O14531	DPYSL4	Dihydropyrimidinase-related protein 4	33623	0	695820
	P26373	RPL13	60S ribosomal protein L13	13364	0	694980
	Q9NYU2-2	UGGT1	UDP-glucose:glycoprotein glucosyltransferase 1	7133.7	567.27	691360
	P33991	MCM4	DNA replication licensing factor MCM4	66758	3640.1	687010
	P43686	PSMC4	26S protease regulatory subunit 6B	2421.8	0	683480
	P25398	RPS12	40S ribosomal protein S12	10712	0	678270
	Q15366-6	PCBP2	Poly(rC)-binding protein 2	2340.2	0	666700
	P12268	IMPDH2	Inosine-5-monophosphate dehydrogenase 2	49721	0	660180
	P47756-2	CAPZB	F-actin-capping protein subunit beta	13071	0	649360
	P30520	ADSS	Adenylosuccinate synthetase isozyme 2	3859.6	0	610960
	P62195	PSMC5	26S protease regulatory subunit 8	32126	3207.9	584620
	Q14980-2	NUMA1	Nuclear mitotic apparatus protein 1	37135	378.07	583840
	P55884	EIF3B	Eukaryotic translation initiation factor 3 subunit B	32193	4704.4	571960
	P38606	ATP6V1A	V-type proton ATPase catalytic subunit A	57588	1007.2	568600
	P46776	RPL27A	60S ribosomal protein L27a	7176.1	0	562730
	O75390	CS	Citrate synthase, mitochondrial	3736.9	0	554250
	P55084-2	HADHB	Trifunctional enzyme subunit beta, mitochondrial	18939	2619.1	552740
	P25205	MCM3	DNA replication licensing factor MCM3	84316	6439.5	547440
	P36578	RPL4	60S ribosomal protein L4	16452	5465.1	534540
	P62269	RPS18	40S ribosomal protein S18	4075.9	0	526520
	P62873-2	GNB1	Guanine nucleotide-binding protein G(I)/G(S)/G(T) subunit beta-1	5206.7	2548.5	521910
	Q96KP4	CNDP2	Cytosolic non-specific dipeptidase	24185	0	507380
	P18621	RPL17	60S ribosomal protein L17	12861	0	497000
	Q9NTK5	OLA1	Obg-like ATPase 1	11706	0	495380
	Q99536	VAT1	Synaptic vesicle membrane protein VAT-1 homolog	5544.1	0	490130
	O43242	PSMD3	26S proteasome non-ATPase regulatory subunit 3	18480	0	486330
	Q13200	PSMD2	26S proteasome non-ATPase regulatory subunit 2	29240	0	482870
	Q99460-2	PSMD1	26S proteasome non-ATPase regulatory subunit 1	24498	2251.2	480540
	Q13643	FHL3	Four and a half LIM domains protein 3	2738.8	0	476080
	P54687-4	BCAT1	Branched-chain-amino-acid aminotransferase, cytosolic	6320	0	441180
	P25705	ATP5A1	ATP synthase subunit alpha, mitochondrial	35628	0	441090
	P49588	AARS	Alanine--tRNA ligase, cytoplasmic	62338	9932.4	440840
	Q16186	ADRM1	Proteasomal ubiquitin receptor ADRM1	39598	0	436030
	Q9UBQ5	EIF3K	Eukaryotic translation initiation factor 3 subunit K	4454.1	0	427550
	Q08380	LGALS3BP	Galectin-3-binding protein	10369	0	413550
	P09622	DLD	Dihydrolipoyl dehydrogenase, mitochondrial	40128	0	411150
	P35813	PPM1A	Protein phosphatase 1A	13812	4365.4	410410
	Q14103-3	HNRNPD	Heterogeneous nuclear ribonucleoprotein D0	3752.2	0	404430
	P61160	ACTR2	Actin-related protein 2	15169	9872.3	401280
	P54578-2	USP14	Ubiquitin carboxyl-terminal hydrolase 14	47888	0	400710
	P06748-3	NPM1	Nucleophosmin	17590	8102	398660
	O43396	TXNL1	Thioredoxin-like protein 1	3325.6	0	396920
	P43034	PAFAH1B1	Platelet-activating factor acetylhydrolase IB subunit alpha	5372.4	0	396300
	P13861	PRKAR2A	cAMP-dependent protein kinase type II-alpha regulatory subunit	21563	0	390960
	P55786	NPEPPS	Puromycin-sensitive aminopeptidase	33612	0	389320
	P21266	GSTM3	Glutathione S-transferase Mu 3	1870.8	0	389150
	Q12931-2	TRAP1	Heat shock protein 75 kDa, mitochondrial	26285	1148.3	383870
	P28838-2	LAP3	Cytosol aminopeptidase	4390.6	0	379860
	Q16836	HADH	Hydroxyacyl-coenzyme A dehydrogenase, mitochondrial	5343.7	0	377950
	P62917	RPL8	60S ribosomal protein L8	8603.3	3496.9	376610
	Q9NWV8	BABAM1	BRISC and BRCA1-A complex member 1	34199	0	373470
	P40939	HADHA	Trifunctional enzyme subunit alpha, mitochondrial	30823	1691.5	365060
	Q15691	MAPRE1	Microtubule-associated protein RP/EB family member 1	4347.1	0	362040
	P19623	SRM	Spermidine synthase	9264.6	0	358180
	Q01813	PFKP	6-phosphofructokinase type C	13645	0	356520
	Q04323	UBXN1	UBX domain-containing protein 1	20414	6041.7	355710
	P33176	KIF5B	Kinesin-1 heavy chain	26798	2279.9	355230
	Q13126-4	MTAP	S-methyl-5-thioadenosine phosphorylase	3133.1	0	354580
	Q99798	ACO2	Aconitate hydratase, mitochondrial	26473	0	345570
	Q99613-2	EIF3C	Eukaryotic translation initiation factor 3 subunit C	5442.2	3322.1	345060
	Q14152	EIF3A	Eukaryotic translation initiation factor 3 subunit A	24751	0	344510
	O15067	PFAS	Phosphoribosylformylglycinamidine synthase	3260.3	1611	341600
	P31323	PRKAR2B	cAMP-dependent protein kinase type II-beta regulatory subunit	9844.1	0	339390
	O60664-4	PLIN3	Perilipin-3	3564.2	0	335640
	Q9NY33-4	DPP3	Dipeptidyl peptidase 3	12938	0	335320
	P33992	MCM5	DNA replication licensing factor MCM5	29618	0	334930
	Q07812-5	BAX	Apoptosis regulator BAX	19081	0	329010
	P39023	RPL3	60S ribosomal protein L3	18520	4816.6	327240
	P52701	MSH6	DNA mismatch repair protein Msh6	10147	0	324870
	P81605	DCD	Dermcidin	307440	42203	324000
	Q13177	PAK2	Serine/threonine-protein kinase PAK 2	48564	0	320700
	P05455	SSB	Lupus La protein	17784	0	319290
	O96019-2	ACTL6A	Actin-like protein 6A	2565.6	2175.7	313900
	P11137-3	MAP2	Microtubule-associated protein 2	8817.9	0	308110
	P42765	ACAA2	3-ketoacyl-CoA thiolase, mitochondrial	4233.2	0	304020
	P21333-2	FLNA	Filamin-A	14927	0	303610
	P38117	ETFB	Electron transfer flavoprotein subunit beta	6038.6	0	302290
	P27708	CAD	CAD protein	23357	0	300980
	Q9H4A4	RNPEP	Aminopeptidase B	17080	1765.8	299280
	P49189	ALDH9A1	4-trimethylaminobutyraldehyde dehydrogenase	13093	0	291020
	Q9GZL7	WDR12	Ribosome biogenesis protein WDR12	15738	0	289350
	P62191-2	PSMC1	26S protease regulatory subunit 4	27189	0	285010
	Q9Y490	TLN1	Talin-1	14094	0	283510
	O43795-2	MYO1B	Unconventional myosin-Ib	5471.5	734.15	283300
	P43490	NAMPT	Nicotinamide phosphoribosyltransferase	1883.9	0	281860
	P23588	EIF4B	Eukaryotic translation initiation factor 4B	2020	0	281710
	P49591	SARS	Serine--tRNA ligase, cytoplasmic	4722.2	0	281420
	Q13838	DDX39B	Spliceosome RNA helicase DDX39B	7078	3015.1	279890
	P62820-2	RAB1A	Ras-related protein Rab-1A	6744.8	0	277960
	O00231	PSMD11	26S proteasome non-ATPase regulatory subunit 11	1748.1	0	277300
	P61247	RPS3A	40S ribosomal protein S3a	27972	0	273750
	P62906	RPL10A	60S ribosomal protein L10a	5159.1	0	272260
	Q9UKF6	CPSF3	Cleavage and polyadenylation specificity factor subunit 3	10459	0	271480
	O43237	DYNC1LI2	Cytoplasmic dynein 1 light intermediate chain 2	25107	0	265980
	P14868	DARS	Aspartate--tRNA ligase, cytoplasmic	19593	0	265010
	Q8IZ83-3	ALDH16A1	Aldehyde dehydrogenase family 16 member A1	8150.8	0	264310
	O95429-2	BAG4	BAG family molecular chaperone regulator 4	7964.7	0	263710
	Q9NQW7	XPNPEP1	Xaa-Pro aminopeptidase 1	16143	0	259370
	Q9UJZ1-2	STOML2	Stomatin-like protein 2, mitochondrial	2338.1	0	257520
	Q13813-2	SPTAN1	Spectrin alpha chain, non-erythrocytic 1	9553.7	0	255610
	P61158	ACTR3	Actin-related protein 3	12435	2517.4	251230
	P54136	RARS	Arginine--tRNA ligase, cytoplasmic	14157	0	244810
	P48147	PREP	Prolyl endopeptidase	9452.2	1986.9	244610
	Q01082	SPTBN1	Spectrin beta chain, non-erythrocytic 1	31873	0	243560
	Q9HC38-2	GLOD4	Glyoxalase domain-containing protein 4	12729	0	235910
	O75821	EIF3G	Eukaryotic translation initiation factor 3 subunit G	36986	1881.9	233370
	Q86VP6	CAND1	Cullin-associated NEDD8-dissociated protein 1	2654.3	0	231180
	Q7L099	RUFY3	Protein RUFY3	6141	0	228280
	P56192	MARS	Methionine--tRNA ligase, cytoplasmic	12664	0	226930
	Q07866-8	KLC1	Kinesin light chain 1	16733	0	220950
	Q8NC51-4	SERBP1	Plasminogen activator inhibitor 1 RNA-binding protein	10459	0	214900
	P30084	ECHS1	Enoyl-CoA hydratase, mitochondrial	3440.6	0	213590
	P11586	MTHFD1	C-1-tetrahydrofolate synthase, cytoplasmic	28568	0	213580
	P49419-2	ALDH7A1	Alpha-aminoadipic semialdehyde dehydrogenase	2014.7	0	209630
	P00367	GLUD1	Glutamate dehydrogenase 1, mitochondrial	8092.4	0	208380
	Q9Y281	CFL2	Cofilin-2	6460.5	0	206310
	P11172	UMPS	Uridine 5-monophosphate synthase	2699.9	0	206040
	Q15018	FAM175B	BRISC complex subunit Abro1	2697.4	0	203380
	P13798	APEH	Acylamino-acid-releasing enzyme	23350	1597.3	202630
	P23396	RPS3	40S ribosomal protein S3	2418.5	0	201020
	P02786	TFRC	Transferrin receptor protein 1	9556.9	0	197580
	P52789	HK2	Hexokinase-2	20397	1094.5	190960
	P35237	SERPINB6	Serpin B6	8272.9	0	189810
	Q96FC7-2	PHYHIPL	Phytanoyl-CoA hydroxylase-interacting protein-like	3991.1	0	189350
	P11413	G6PD	Glucose-6-phosphate 1-dehydrogenase	26650	0	189320
	Q9UQ80	PA2G4	Proliferation-associated protein 2G4	8155.3	0	188220
	O15355	PPM1G	Protein phosphatase 1G	1350.5	0	188190
	Q5SW79-3	CEP170	Centrosomal protein of 170 kDa	6028.2	0	184430
	Q9UGI8-2	TES	Testin	16465	1263	182920
	P53041	PPP5C	Serine/threonine-protein phosphatase 5	1979.7	0	180610
	P49915-2	GMPS	GMP synthase [glutamine-hydrolyzing]	22596	0	179020
	P09960	LTA4H	Leukotriene A-4 hydrolase	18691	0	175610
	Q16643	DBN1	Drebrin	16022	0	172860
	Q16531	DDB1	DNA damage-binding protein 1	1052.6	1625.8	170570
	Q1KMD3	HNRNPUL2	Heterogeneous nuclear ribonucleoprotein U-like protein 2	11329	1043.6	170360
	P15170-2	GSPT1	Eukaryotic peptide chain release factor GTP-binding subunit ERF3A	11461	0	170100
	O60443	DFNA5	Non-syndromic hearing impairment protein 5	2784.9	0	169700
	Q92616	GCN1L1	Translational activator GCN1	1444.2	0	168210
	Q99729-3	HNRNPAB	Heterogeneous nuclear ribonucleoprotein A/B	0	0	166470
	Q99615-2	DNAJC7	DnaJ homolog subfamily C member 7	5942.8	0	165740
	Q9Y2Z0-2	SUGT1	Suppressor of G2 allele of SKP1 homolog	18106	0	165400
	P51148	RAB5C	Ras-related protein Rab-5C	3377.8	0	164660
	P35579	MYH9	Myosin-9	9170.7	1435.8	161170
	Q96QK1	VPS35	Vacuolar protein sorting-associated protein 35	1384.6	0	159030
	Q96HE7	ERO1L	ERO1-like protein alpha	9595.8	0	150580
	P78527	PRKDC	DNA-dependent protein kinase catalytic subunit	2376.9	0	150190
	Q8WZA9	IRGQ	Immunity-related GTPase family Q protein	1922.6	0	148870
	Q6FI81-3	CIAPIN1	Anamorsin	5299.7	0	147720
	Q13630	TSTA3	GDP-L-fucose synthase	3439.9	0	147150
	Q9H6Z4-3	RANBP3	Ran-binding protein 3	3830.5	0	146320
	Q9P2R7-2	SUCLA2	Succinyl-CoA ligase [ADP-forming] subunit beta, mitochondrial	9805.2	0	142590
	O00410	IPO5	Importin-5	1789.5	0	140490
	Q9NSE4	IARS2	Isoleucine--tRNA ligase, mitochondrial	21651	1382.7	138600
	Q9HC35-2	EML4	Echinoderm microtubule-associated protein-like 4	9285.3	496.31	137740
	P09651-3	HNRNPA1	Heterogeneous nuclear ribonucleoprotein A1	3163.2	0	135100
	P24752	ACAT1	Acetyl-CoA acetyltransferase, mitochondrial	1923.1	0	131550
	P11216	PYGB	Glycogen phosphorylase, brain form	4417	0	131020
	Q9UHD8-3	2009-09-01	Septin-9	9255.9	0	130890
	P35580	MYH10	Myosin-10	12525	917.82	130800
	Q15046	KARS	Lysine--tRNA ligase	27445	3054.2	126580
	P22626-2	HNRNPA2B1	Heterogeneous nuclear ribonucleoproteins A2/B1	6826.9	0	125830
	Q8IV08	PLD3	Phospholipase D3	4682.9	0	125110
	P29144	TPP2	Tripeptidyl-peptidase 2	5887.9	0	124650
	P07814	EPRS	Bifunctional glutamate/proline--tRNA ligase	15984	603.46	124180
	Q13564-3	NAE1	NEDD8-activating enzyme E1 regulatory subunit	8452.9	0	123600
	Q9HB07	C12orf10	UPF0160 protein MYG1, mitochondrial	3563.8	0	119420
	P40429	RPL13A	60S ribosomal protein L13a	9361.6	0	118990
	P42574	CASP3	Caspase-3	17473	3401	117420
	P23368	ME2	NAD-dependent malic enzyme, mitochondrial	12961	0	116330
	Q9NUJ3	TCP11L1	T-complex protein 11-like protein 1	1672.9	0	115810
	P36915	GNL1	Guanine nucleotide-binding protein-like 1	6512.6	0	114700
	P34897-3	SHMT2	Serine hydroxymethyltransferase, mitochondrial	2898.3	0	113270
	O94979-5	SEC31A	Protein transport protein Sec31A	2775.9	0	112910
	P31943	HNRNPH1	Heterogeneous nuclear ribonucleoprotein H	16258	0	112640
	Q15773	MLF2	Myeloid leukemia factor 2	9010	0	112190
	Q16822	PCK2	Phosphoenolpyruvate carboxykinase [GTP], mitochondrial	7246.2	0	110360
	P15311	EZR	Ezrin	14431	0	109160
	P11940-2	PABPC1	Polyadenylate-binding protein 1	7994.1	0	105920
	Q13867	BLMH	Bleomycin hydrolase	2371.3	0	103460
	P26639	TARS	Threonine--tRNA ligase, cytoplasmic	7007.8	0	102930
	Q9P2J5	LARS	Leucine--tRNA ligase, cytoplasmic	2400.2	0	102380
	P57737-2	CORO7	Coronin-7	4181.6	0	101870
	P31942-2	HNRNPH3	Heterogeneous nuclear ribonucleoprotein H3	8416.7	0	101520
	P47897-2	QARS	Glutamine--tRNA ligase	9092.9	0	101240
	Q9NVA2	2011-09-01	Septin-11	7521	0	98187
	P48444	ARCN1	Coatomer subunit delta	5368.4	0	97938
	Q92973-2	TNPO1	Transportin-1	4418.3	0	97788
	Q92823-3	NRCAM	Neuronal cell adhesion molecule	734.24	0	97549
	P35606	COPB2	Coatomer subunit beta	6793	0	95198
	O43707	ACTN4	Alpha-actinin-4	24698	0	94649
	P27694	RPA1	Replication protein A 70 kDa DNA-binding subunit	5866.3	0	94433
	Q8WY54-2	PPM1E	Protein phosphatase 1E	15603	0	93795
	P31937	HIBADH	3-hydroxyisobutyrate dehydrogenase, mitochondrial	2322.8	0	90022
	Q9Y6D6	ARFGEF1	Brefeldin A-inhibited guanine nucleotide-exchange protein 1	5972.3	0	87689
	Q9Y6G9	DYNC1LI1	Cytoplasmic dynein 1 light intermediate chain 1	4133.4	0	87374
	Q8WUM4	PDCD6IP	Programmed cell death 6-interacting protein	6396.7	0	85469
	O15372	EIF3H	Eukaryotic translation initiation factor 3 subunit H	15987	0	84648
	P62805	HIST1H4A	Histone H4	0	14394	83709
	Q9UKG1	APPL1	DCC-interacting protein 13-alpha	14543	0	83617
	P53992	SEC24C	Protein transport protein Sec24C	4997.8	0	79657
	Q96P70	IPO9	Importin-9	2014.4	0	76650
	P52888	THOP1	Thimet oligopeptidase	3248.6	0	75737
	P10644	PRKAR1A	cAMP-dependent protein kinase type I-alpha regulatory subunit	15763	0	75645
	P07384	CAPN1	Calpain-1 catalytic subunit	4095.1	0	75126
	P36776-3	LONP1	Lon protease homolog, mitochondrial	22642	0	75060
	Q04206-2	RELA	Transcription factor p65	17948	0	75009
	Q01469	FABP5	Fatty acid-binding protein, epidermal	30835	6043.9	74578
	P52272-2	HNRNPM	Heterogeneous nuclear ribonucleoprotein M	7058.4	0	74547
	Q14203-3	DCTN1	Dynactin subunit 1	8817	0	74260
	O94925-3	GLS	Glutaminase kidney isoform, mitochondrial	6892.1	0	73754
	Q6SZW1	SARM1	Sterile alpha and TIR motif-containing protein 1	3278.3	0	72550
	Q06203	PPAT	Amidophosphoribosyltransferase	6960	0	72416
	Q7Z4S6-6	KIF21A	Kinesin-like protein KIF21A	5967.5	0	72270
	P40763-2	STAT3	Signal transducer and activator of transcription 3	4527	0	70039
	Q9HA64	FN3KRP	Ketosamine-3-kinase	6317.4	0	69776
	O60282	KIF5C	Kinesin heavy chain isoform 5C	2617	0	68317
	Q6IA86-4	ELP2	Elongator complex protein 2	1829.2	0	67229
	Q12906-5	ILF3	Interleukin enhancer-binding factor 3	18183	0	65908
	Q08209-5	PPP3CA	Serine/threonine-protein phosphatase 2B catalytic subunit alpha isoform	9117	0	65123
	Q07343-3	PDE4B	cAMP-specific 3,5-cyclic phosphodiesterase 4B	20369	0	64984
	O60271-4	SPAG9	C-Jun-amino-terminal kinase-interacting protein 4	2575.9	0	64699
	Q9UIA9	XPO7	Exportin-7	2576.4	0	61624
	Q9BTE3-2	MCMBP	Mini-chromosome maintenance complex-binding protein	9064	0	61386
	P27824	CANX	Calnexin	1969	0	59881
	O15294	OGT	UDP-N-acetylglucosamine--peptide N-acetylglucosaminyltransferase 110 kDa subunit	7092.4	0	59873
	Q06124-2	PTPN11	Tyrosine-protein phosphatase non-receptor type 11	10839	0	58729
	P55809	OXCT1	Succinyl-CoA:3-ketoacid coenzyme A transferase 1, mitochondrial	24930	0	58245
	Q7L0J3-2	SV2A	Synaptic vesicle glycoprotein 2A	8644.3	0	58085
	Q13596-2	SNX1	Sorting nexin-1	3942.2	0	58077
	P41252	IARS	Isoleucine--tRNA ligase, cytoplasmic	5498.9	0	57298
	Q9UJU6-2	DBNL	Drebrin-like protein	5642.6	0	57185
	P33240-2	CSTF2	Cleavage stimulation factor subunit 2	4816.3	0	56397
	P05060	CHGB	Secretogranin-1	2511.4	0	53606
	O43592	XPOT	Exportin-T	7649.5	0	53263
	Q8NBF2	NHLRC2	NHL repeat-containing protein 2	8424.4	0	52649
	O00267-2	SUPT5H	Transcription elongation factor SPT5	2154.6	0	52524
	Q9UJW0	DCTN4	Dynactin subunit 4	6895.2	0	51780
	P12270	TPR	Nucleoprotein TPR	1047.7	0	49965
	O43252	PAPSS1	Bifunctional 3-phosphoadenosine 5-phosphosulfate synthase 1	1966.2	0	49476
	Q9HAV4	XPO5	Exportin-5	5154.7	0	49442
	P35611-2	ADD1	Alpha-adducin	8569.7	0	48942
	P17858	PFKL	6-phosphofructokinase, liver type	4419.4	0	48628
	Q9Y6Y0	IVNS1ABP	Influenza virus NS1A-binding protein	1664	0	48463
	O60568	PLOD3	Procollagen-lysine,2-oxoglutarate 5-dioxygenase 3	5993.7	0	48310
	Q9BR76	CORO1B	Coronin-1B	10462	0	47899
	Q9NQX3	GPHN	Gephyrin	10082	0	47722
	O75369-6	FLNB	Filamin-B	11053	0	47538
	Q10713	PMPCA	Mitochondrial-processing peptidase subunit alpha	4796.5	0	44211
	Q14141-2	2006-09-01	Septin-6	7730.2	0	44025
	Q9NVE7	PANK4	Pantothenate kinase 4	8965.4	0	43975
	Q9NZD8-2	SPG21	Maspardin	2691.4	0	43599
	Q9NTZ6	RBM12	RNA-binding protein 12	5110.5	0	43026
	P04040	CAT	Catalase	13020	0	42737
	Q9Y263	PLAA	Phospholipase A-2-activating protein	11625	0	42624
	P26640	VARS	Valine--tRNA ligase	909.81	0	42483
	Q96AY3	FKBP10	Peptidyl-prolyl cis-trans isomerase FKBP10	1654.6	0	42003
	P49903-3	SEPHS1	Selenide, water dikinase 1	16620	0	41201
	P43246-2	MSH2	DNA mismatch repair protein Msh2	5676.8	0	40862
	Q12888	TP53BP1	Tumor suppressor p53-binding protein 1	640.64	0	40101
	Q05086-2	UBE3A	Ubiquitin-protein ligase E3A	12307	0	39777
	Q96C86	DCPS	m7GpppX diphosphatase	3408.4	0	39336
	Q7Z6Z7-2	HUWE1	E3 ubiquitin-protein ligase HUWE1	1988.9	0	39212
	O94855	SEC24D	Protein transport protein Sec24D	2543.8	0	38559
	P13674-3	P4HA1	Prolyl 4-hydroxylase subunit alpha-1	3476.9	0	38027
	Q04726-2	TLE3	Transducin-like enhancer protein 3	2491.8	0	37877
	P23921	RRM1	Ribonucleoside-diphosphate reductase large subunit	2487.4	0	37510
	Q9ULV4	CORO1C	Coronin-1C	2739.4	0	37319
	Q9NZT2-2	OGFR	Opioid growth factor receptor	6988.2	0	36421
	P05023-3	ATP1A1	Sodium/potassium-transporting ATPase subunit alpha-1	1450.3	0	36405
	Q01581	HMGCS1	Hydroxymethylglutaryl-CoA synthase, cytoplasmic	4463.6	0	36246
	P11498	PC	Pyruvate carboxylase, mitochondrial	1516.8	0	35563
	Q9H3P7	ACBD3	Golgi resident protein GCP60	18714	0	35344
	Q15019	2002-09-01	Septin-2	1578	0	33266
	P62140	PPP1CB	Serine/threonine-protein phosphatase PP1-beta catalytic subunit	8028.1	0	32014
	Q9UHX1-4	PUF60	Poly(U)-binding-splicing factor PUF60	2082.1	0	31655
	Q9NRL3	STRN4	Striatin-4	10503	0	31115
	Q8N1F7	NUP93	Nuclear pore complex protein Nup93	938.35	0	29632
	Q9Y5A9	YTHDF2	YTH domain family protein 2	2513.8	0	29609
	O95757	HSPA4L	Heat shock 70 kDa protein 4L	12237	0	29492
	O95747	OXSR1	Serine/threonine-protein kinase OSR1	5511.9	0	29444
	Q10567-4	AP1B1	AP-1 complex subunit beta-1	5402.4	0	29145
	P15927	RPA2	Replication protein A 32 kDa subunit	3971.3	0	28472
	Q15437	SEC23B	Protein transport protein Sec23B	0	816.73	28040
	P17655-2	CAPN2	Calpain-2 catalytic subunit	2918.3	0	27567
	P19174	PLCG1	1-phosphatidylinositol 4,5-bisphosphate phosphodiesterase gamma-1	4070.4	0	26658
	Q9BYT8	NLN	Neurolysin, mitochondrial	1754.1	0	26412
	O95163	IKBKAP	Elongator complex protein 1	972.61	0	26014
	P46940	IQGAP1	Ras GTPase-activating-like protein IQGAP1	623.36	0	25963
	O60701-2	UGDH	UDP-glucose 6-dehydrogenase	11776	0	25140
	P48163	ME1	NADP-dependent malic enzyme	8622.3	0	24698
	Q9NTJ3-2	SMC4	Structural maintenance of chromosomes protein 4	1356	0	23625
	Q9UNF1	MAGED2	Melanoma-associated antigen D2	4960.2	0	21327
	O14744	PRMT5	Protein arginine N-methyltransferase 5	4969.3	0	21323
	P12956	XRCC6	X-ray repair cross-complementing protein 6	1538.5	1876.2	20896
	O43143	DHX15	Putative pre-mRNA-splicing factor ATP-dependent RNA helicase DHX15	4307.1	0	20785
	Q2TAL8	QRICH1	Glutamine-rich protein 1	9207.2	0	19909
	Q9C0B1	FTO	Alpha-ketoglutarate-dependent dioxygenase FTO	2905.1	0	19336
	Q8N806	UBR7	Putative E3 ubiquitin-protein ligase UBR7	9237.4	0	19186
	Q9H0B6-2	KLC2	Kinesin light chain 2	1346.8	0	19110
	Q9UI10-3	EIF2B4	Translation initiation factor eIF-2B subunit delta	2307.6	0	19105
	O95373	IPO7	Importin-7	5719.2	0	18534
	Q5TF21	SOGA3	Protein SOGA3	586.96	0	18056
	Q16537-2	PPP2R5E	Serine/threonine-protein phosphatase 2A 56 kDa regulatory subunit epsilon isoform	2276.5	0	17898
	Q6IN85-4	SMEK1	Serine/threonine-protein phosphatase 4 regulatory subunit 3A	12181	0	17836
	Q16181-2	SEPT7	Septin-7	15419	0	16829
	Q05209	PTPN12	Tyrosine-protein phosphatase non-receptor type 12	853.47	0	16610
	Q06210-2	GFPT1	Glutamine--fructose-6-phosphate aminotransferase [isomerizing] 1	2023.7	0	15824
	P49593	PPM1F	Protein phosphatase 1F	5369.2	0	15807
	Q93009	USP7	Ubiquitin carboxyl-terminal hydrolase 7	2352.9	0	15684
	O75312	ZNF259	Zinc finger protein ZPR1	6271.6	0	15363
	Q08752	PPID	Peptidyl-prolyl cis-trans isomerase D	3168.7	0	15295
	P42224	STAT1	Signal transducer and activator of transcription 1-alpha/beta	1325.8	0	15203
	P19387	POLR2C	DNA-directed RNA polymerase II subunit RPB3	2981.1	0	15063
	Q08J23-2	NSUN2	tRNA (cytosine(34)-C(5))-methyltransferase	5121.1	0	14796
	Q8TAQ2-2	SMARCC2	SWI/SNF complex subunit SMARCC2	1241.6	0	14704
	P17844	DDX5	Probable ATP-dependent RNA helicase DDX5	3528.8	0	14594
	Q86TI2-4	DPP9	Dipeptidyl peptidase 9	2958.3	0	14511
	P13010	XRCC5	X-ray repair cross-complementing protein 5	5839.7	0	14358
	Q15393	SF3B3	Splicing factor 3B subunit 3	1108.1	0	14197
	Q96RP9	GFM1	Elongation factor G, mitochondrial	1190.8	0	13589
	P78347-2	GTF2I	General transcription factor II-I	1919	0	13386
	Q9UMR2-2	DDX19B	ATP-dependent RNA helicase DDX19B	6956.4	0	13306
	P51784	USP11	Ubiquitin carboxyl-terminal hydrolase 11	1725.9	0	12891
	Q9Y3I0	C22orf28	tRNA-splicing ligase RtcB homolog	4562.5	0	12638
	P54577	YARS	Tyrosine--tRNA ligase, cytoplasmic	11208	0	12533
	O95671-2	ASMTL	N-acetylserotonin O-methyltransferase-like protein	1744.4	0	12244
	Q9UNN5-2	FAF1	FAS-associated factor 1	11057	0	11642
	Q96T51	RUFY1	RUN and FYVE domain-containing protein 1	2492.1	0	11411
	O60341	KDM1A	Lysine-specific histone demethylase 1A	3027.9	0	10876
	P31146	CORO1A	Coronin-1A	9147.3	0	10704
	Q15029-2	EFTUD2	116 kDa U5 small nuclear ribonucleoprotein component	1466.9	0	10261
	Q15291	RBBP5	Retinoblastoma-binding protein 5	0	1220.9	9882.1
	Q08211	DHX9	ATP-dependent RNA helicase A	495.41	0	9843.5
	Q12756	KIF1A	Kinesin-like protein KIF1A	1006.1	0	9703.6
	Q9Y2L1-2	DIS3	Exosome complex exonuclease RRP44	2219.4	0	8971.1
	Q9HCC0-2	MCCC2	Methylcrotonoyl-CoA carboxylase beta chain, mitochondrial	10639	0	8845.6
	Q13085-3	ACACA	Acetyl-CoA carboxylase 1	299.54	0	8199.2
	P63010-3	AP2B1	AP-2 complex subunit beta	1102.5	0	8181
	O94776	MTA2	Metastasis-associated protein MTA2	3346.5	0	8005.8
	Q9BWU0	SLC4A1AP	Kanadaptin	695.7	0	7719
	P53618	COPB1	Coatomer subunit beta	3210.3	0	7615.6
	P12814-2	ACTN1	Alpha-actinin-1	11056	0	7181.7
	Q3KQU3-2	MAP7D1	MAP7 domain-containing protein 1	1169.7	0	6417.9
	Q9BZE9-3	ASPSCR1	Tether containing UBX domain for GLUT4	5101.9	0	6325.3
	Q15003	NCAPH	Condensin complex subunit 2	2329.7	0	6238.9
	P42345	MTOR	Serine/threonine-protein kinase mTOR	1297.7	0	5520.2
	O43815-2	STRN	Striatin	2196.2	0	5353.9
	P51532-5	SMARCA4	Transcription activator BRG1	4505.9	0	5307.1
	Q15020	SART3	Squamous cell carcinoma antigen recognized by T-cells 3	1452	0	4962.6
	Q92499-3	DDX1	ATP-dependent RNA helicase DDX1	1712.8	0	4343.9
	Q6P2Q9	PRPF8	Pre-mRNA-processing-splicing factor 8	333.15	0	4327.2
	Q9P2R3	ANKFY1	Ankyrin repeat and FYVE domain-containing protein 1	754.91	0	4305.7
	Q9H3U1-2	UNC45A	Protein unc-45 homolog A	1388.4	0	4112.2
	P46459	NSF	Vesicle-fusing ATPase	922.55	0	4050.2
	Q9NSD9	FARSB	Phenylalanine--tRNA ligase beta subunit	1515.3	0	3972.1
	A5YKK6-3	CNOT1	CCR4-NOT transcription complex subunit 1	851.7	0	3826.2
	Q07954	LRP1	Prolow-density lipoprotein receptor-related protein 1	0	237.06	1619
	Q9NZT1	CALML5	Calmodulin-like protein 5	9697.4	44337	0
	P31947-2	SFN	14-3-3 protein sigma	26030	17415	0
	P14923	JUP	Junction plakoglobin	11271	847.18	0
	Q96G03	PGM2	Phosphoglucomutase-2	7906.7	1406.5	0
