# Supplementary material for: Nucleoredoxin-Dependent Targets and Processes in Neuronal Cells
Source: Oxid Med Cell Longev. 2018 Nov 21;2018:4829872. doi: 10.1155/2018/4829872 (PMC6280245; doi:10.1155/2018/4829872)
Supplement: Supplementary 5 — Using the intermediate trapping approach with mNrxC208S and mouse brain extracts, 1710 proteins with at least two positive iBAQ values were identified. [file 4829872.f5.xlsx]

## Sheet: Tabelle1
	protein ID	gene name	protein name	IBAQ Rd1 in gel	IBAQ Rd1 in solution	IBAQ Rd2 in gel	IBAQ Rd2 in solution
	P02088	Hbb-b1	Hemoglobin subunit beta-1	267760000	230000000	373410000	7547500000
	P01942	Hba	Hemoglobin subunit alpha	484620000	426870000	533070000	6626000000
	P63260	Actg1	Actin, cytoplasmic 2	682180000	129720000	1237100000	4304400000
	P08074	Cbr2	Carbonyl reductase [NADPH]	0	0	332290000	2919900000
	P68372	Tubb4b	Tubulin beta-4B chain	258230000	103500000	304780000	1877000000
	P01966	HBA	Hemoglobin subunit alpha	94715000	38361000	83071000	962020000
	O08709	Prdx6 5	Peroxiredoxin-6	41189000	5502200	207160000	911100000
	P02666	CSN2	Beta-casein	4798700	0	1322900	0
	P07724	Alb	Serum albumin	36877000	4016200	221720000	859820000
	P16858	Gapdh	Glyceraldehyde-3-phosphate dehydrogenase	82319000	41256000	62587000	805690000
	P68373	Tuba1c	Tubulin alpha-1C chain	248910000	78982000	166820000	603160000
	O08553	Dpysl2	Dihydropyrimidinase-related protein 2	331030000	149550000	141560000	593890000
	P40936	Inmt	Indolethylamine N-methyltransferase	0	0	43447000	585400000
	P18760	Cfl1	Cofilin-1	96792000	44431000	52090000	534280000
	Q60605	Myl6	Myosin light polypeptide 6	112740	0	28987000	529040000
	Q99K51	Pls3	Plastin-3	1586300	32658	140000000	494110000
	P35700	Prdx1	Peroxiredoxin-1	44062000	3594500	88591000	489510000
	P24549	Aldh1a1	Retinal dehydrogenase 1	2727800	945380	122600000	469690000
	P17742	Ppia	Peptidyl-prolyl cis-trans isomerase A	212670000	70530000	35429000	429740000
	P10126	Eef1a1	Elongation factor 1-alpha 1	2286800	454610	130940000	373610000
	Q61171	Prdx2	Peroxiredoxin-2	108510000	9819200	30399000	361680000
	P10649	Gstm1	Glutathione S-transferase Mu 1	24887000	10567000	46842000	321080000
	P11352	Gpx1	Glutathione peroxidase 1	2696100	2034300	37784000	315660000
	Q08093	Cnn2	Calponin-2	0	0	37031000	314200000
	P63017	Hspa8	Heat shock cognate 71 kDa protein	401520000	41848000	101130000	312230000
	P26041	Msn	Moesin	326970	197130	57624000	304420000
	Q3SY84	KRT71	Keratin, type II cytoskeletal 71	350650	0	332230	0
	Q9R0P5	Dstn	Destrin	6377200	564550	20476000	301590000
	Q5D862	FLG2	Filaggrin-2	9347.5	0	12822	0
	P22599	Serpina1b	Alpha-1-antitrypsin 1-2	25341000	5910400	61693000	288780000
	Q9D154	Serpinb1a 1	Leukocyte elastase inhibitor A	5165700	565420	84666000	274920000
	P62962	Pfn1	Profilin-1	32422000	5785100	7524900	229910000
	P17563	Selenbp1	Methanethiol oxidase	1067000	8928.8	66067000	225210000
	Q06318	Scgb1a1	Uteroglobin	0	0	9422700	221940000
	P97346	Nxn	Nucleoredoxin	300740000	102320000	43445000	215970000
	Q9DCT8	Crip2	Cysteine-rich protein 2	0	0	18048000	214220000
	Q9D7X3	Dusp3	Dual specificity protein phosphatase 3	6864600	2739000	7679700	206340000
	Q9Z2X1	Hnrnpf	Heterogeneous nuclear ribonucleoprotein F	2885200	290280	126100000	205620000
	P00920	Ca2	Carbonic anhydrase 2	86304000	15102000	14983000	183320000
	P99024	Tubb5	Tubulin beta-5 chain	75894000	24523000	44171000	180700000
	P47738	Aldh2	Aldehyde dehydrogenase, mitochondrial	7459800	2522900	79042000	163070000
	P58252	Eef2	Elongation factor 2	4081300	1986100	33021000	156090000
	Q3THE2	Myl12b	Myosin regulatory light chain 12B	187900	0	10565000	145600000
	P11499	Hsp90ab1	Heat shock protein HSP 90-beta	93404000	13223000	39913000	141250000
	P47955	Rplp1	60S acidic ribosomal protein P1	0	569640	0	139740000
	P63101	Ywhaz	14-3-3 protein zeta/delta	207070000	27223000	21652000	132100000
	P20029	Hspa5	Endoplasmic reticulum chaperone BiP	19651000	898300	51447000	129220000
	Q99PT1	Arhgdia	Rho GDP-dissociation inhibitor 1	78673000	2211600	22692000	125830000
	Q9CRB6	Tppp3	Tubulin polymerization-promoting protein family member 3	552810	496940	7994400	121270000
	Q9WVA4	Tagln2	Transgelin-2	2952100	2056500	16739000	120750000
	P20152	Vim	Vimentin	230190	0	51666000	117810000
	Q60854	Serpinb6	Serpin B6	1928800	307480	49493000	115390000
	P08228	Sod1	Superoxide dismutase	89857000	357550	25275000	113790000
	O08585	Clta	Clathrin light chain A	13286000	4870800	5087600	110390000
	P07309	Ttr	Transthyretin	1832500	129350	1137400	109300000
	P09541	Myl4	Myosin light chain 4	0	0	9356600	108110000
	P40142	Tkt	Transketolase	37551000	14260000	23747000	105310000
	P61979	Hnrnpk	Heterogeneous nuclear ribonucleoprotein K	5594400	359620	54362000	102270000
	P07758	Serpina1a	Alpha-1-antitrypsin 1-1	6552300	6152900	13802000	102260000
	P62204	Calm1	Calmodulin-1	6135300	7474900	1061400	96299000
	F8VPU2	Farp1	FERM, ARHGEF and pleckstrin domain-containing protein 1	10796	28328	8426.1	0
	O35737	Hnrnph1 1	Heterogeneous nuclear ribonucleoprotein H	1013200	0	69389000	96237000
	P46412	Gpx3	Glutathione peroxidase 3	0	0	5484200	94419000
	P09542	Myl3	Myosin light chain 3	0	0	4323400	89265000
	Q62151	Ager	Advanced glycosylation end product-specific receptor	0	0	12546000	87967000
	Q921I1	Tf	Serotransferrin	5969800	643600	23899000	84345000
	O08807	Prdx4	Peroxiredoxin-4	5183500	227820	9875400	81853000
	P50543	S100a11	Protein S100-A11	0	0	1923900	80044000
	P61957	Sumo2	Small ubiquitin-related modifier 2	16675000	0	3318400	79417000
	P15532	Nme1	Nucleoside diphosphate kinase A	29937000	7678000	5410600	77275000
	P27773	Pdia3	Protein disulfide-isomerase A3	12317000	1352600	14409000	76971000
	P02769	ALB	Serum albumin	123270000	7840900	12106000	75730000
	P14152	Mdh1	Malate dehydrogenase, cytoplasmic	177300000	65436000	8804600	75427000
	P63038	Hspd1	60 kDa heat shock protein, mitochondrial	40561000	4186700	32211000	74515000
	P56480	Atp5f1b	ATP synthase subunit beta, mitochondrial	19652000	2211700	27604000	70933000
	P06151	Ldha	L-lactate dehydrogenase A chain	26900000	15400000	8345400	67734000
	Q62188	Dpysl3	Dihydropyrimidinase-related protein 3 )	16061000	5950300	15127000	66185000
	P30115	Gsta3	Glutathione S-transferase A3	0	0	12463000	63181000
	P23492	Pnp	Purine nucleoside phosphorylase	2979400	220300	4619800	62562000
	P19157	Gstp1	Glutathione S-transferase P 1	18639000	12438000	6638200	62032000
	P05064	Aldoa	Fructose-bisphosphate aldolase A	50833000	13625000	17563000	60807000
	Q8BWT1	Acaa2	3-ketoacyl-CoA thiolase, mitochondrial	178700	20787	19179000	60535000
	Q62523	Zyx	Zyxin	753380	0	23708000	59870000
	P99029	Prdx5	Peroxiredoxin-5, mitochondrial	25667000	3769200	2631300	59577000
	P08249	Mdh2	Malate dehydrogenase, mitochondrial	18352000	4567300	5393300	56016000
	P29699	Ahsg	Alpha-2-HS-glycoprotein	284600	0	5916300	53793000
	P60335	Pcbp1	Poly(rC)-binding protein 1	4372700	290050	7192900	53620000
	P17182	Eno1	Alpha-enolase	355970000	71885000	28690000	52707000
	Q8BXK9	Clic5	Chloride intracellular channel protein 5	0	0	3743900	52341000
	P47754	Capza2	F-actin-capping protein subunit alpha-2	11848000	1330700	3574200	51767000
	O54724	Cavin1	Caveolae-associated protein 1	0	0	17013000	50948000
	Q9R0Y5	Ak1	Adenylate kinase isoenzyme 1	51352000	3111100	5557200	50361000
	O09053	Wrn	Werner syndrome ATP-dependent helicase homolog	16013	0	9470	0
	Q8VCT4	Ces1d	Carboxylesterase 1D	1068300	0	20336000	50340000
	Q8BH64	Ehd2	EH domain-containing protein 2	0	0	8698000	49158000
	O09164	Sod3	Extracellular superoxide dismutase	0	0	9541700	48552000
	P52480	Pkm	Pyruvate kinase PKM	134110000	35405000	16356000	45682000
	P06745	Gpi	Glucose-6-phosphate isomerase	32379000	47610000	6310600	44197000
	Q9EP95	Retnla	Resistin-like alpha	0	0	36466	42977000
	P14602	Hspb1	Heat shock protein beta-1	0	0	11386000	42616000
	P31725	S100a9	Protein S100-A9	0	0	95003	41545000
	O35129	Phb2	Prohibitin-2	22187	0	8218.8	0
	P26883	Fkbp1a	Peptidyl-prolyl cis-trans isomerase FKBP1A	109040000	24398000	16383000	41163000
	Q08091	Cnn1	Calponin-1	0	0	6654800	40329000
	Q9CZY3	Ube2v1	Ubiquitin-conjugating enzyme E2 variant 1	10247000	6382700	3810100	39614000
	P97447	Fhl1	Four and a half LIM domains protein 1	0	0	7971800	38705000
	Q99LX0	Park7	Protein/nucleic acid deglycase DJ-1	40922000	4163100	7041800	38512000
	A2AQ07	Tubb1	Tubulin beta-1 chain	0	0	34541000	37626000
	P62627	Dynlrb1	Dynein light chain roadblock-type 1	3473200	3878200	1366300	36275000
	Q03265	Atp5f1a	ATP synthase subunit alpha, mitochondrial	5340600	399050	24867000	36049000
	O35344	Kpna3	Importin subunit alpha-4	21720	0	38951	0
	Q93092	Taldo1	Transaldolase	5740700	1156900	3347300	35526000
	Q62465	Vat1	Synaptic vesicle membrane protein VAT-1 homolog	300810	191870	12709000	34586000
	P32921	Wars	Tryptophan--tRNA ligase, cytoplasmic	1062800	160520	17427000	34585000
	P07759	Serpina3k	Serine protease inhibitor A3K	36041000	5534700	14302000	34089000
	P62259	Ywhae	14-3-3 protein epsilon	58372000	7011500	5107200	33168000
	Q9QVP4	Myl7	Myosin regulatory light chain 2, atrial isoform	0	0	1824700	33160000
	P68254	Ywhaq	14-3-3 protein theta	22139000	10215000	3963200	32834000
	P00329	Adh1	Alcohol dehydrogenase 1	0	0	3111000	32159000
	P97315	Csrp1	Cysteine and glycine-rich protein 1	46582	0	7474200	31755000
	Q7TMM9	Tubb2a	Tubulin beta-2A chain	97583000	21595000	25394000	31687000
	P23953	Ces1c	Carboxylesterase 1C	2518300	223410	10801000	31656000
	Q99KI0	Aco2	Aconitate hydratase, mitochondrial	29222000	7698800	8473600	31150000
	Q91VW3	Sh3bgrl3	SH3 domain-binding glutamic acid-rich-like protein 3	3050800	5367600	0	31120000
	Q9Z1Q5	Clic1	Chloride intracellular channel protein 1	461780	134590	4243400	31062000
	Q9DCW4	Etfb	Electron transfer flavoprotein subunit beta	2602500	153650	11177000	30271000
	P09411	Pgk1	Phosphoglycerate kinase 1	125680000	38041000	14510000	30196000
	O88569	Hnrnpa2b1	Heterogeneous nuclear ribonucleoproteins A2/B1	328660	0	2434000	29801000
	Q3UH68	Limch1	LIM and calponin homology domains-containing protein 1	0	0	13726000	29561000
	Q9D8E6	Rpl4	60S ribosomal protein L4	0	18424	1444200	29548000
	P84104	Srsf3	Serine/arginine-rich splicing factor 3	63344	0	31928	29270000
	P84099	Rpl19	60S ribosomal protein L19	0	0	1896300	28857000
	Q921H8	Acaa1a	3-ketoacyl-CoA thiolase A, peroxisomal	0	0	8259700	28244000
	Q9WVK4	Ehd1	EH domain-containing protein 1	196060	0	8234500	28189000
	P54071	Idh2	Isocitrate dehydrogenase [NADP], mitochondrial	0	0	6568500	27419000
	Q64727	Vcl	Vinculin	796630	24492	16775000	27180000
	Q8CIB5	Fermt2	Fermitin family homolog 2	0	0	3500200	27136000
	P50404	Sftpd	Pulmonary surfactant-associated protein D	0	0	11126000	26831000
	P24270	Cat	Catalase	120890	35604	10213000	26802000
	Q9EQP2	Ehd4	EH domain-containing protein 4	36620	14311	7158300	26773000
	Q9WUB3	Pygm	Glycogen phosphorylase, muscle form	3109500	3514500	5376300	26657000
	P16015	Ca3	Carbonic anhydrase 3	142950	185210	2728900	26513000
	P24547	Impdh2	Inosine-5'-monophosphate dehydrogenase 2	0	0	15009000	26337000
	Q921F2	Tardbp	TAR DNA-binding protein 43	76335	71223	2406600	26198000
	O54946	Dnajb6	DnaJ homolog subfamily B member 6	146360	0	14529	0
	Q61937	Npm1	Nucleophosmin	168050	0	1377800	26059000
	Q8BFW7	Lpp	Lipoma-preferred partner homolog	0	0	7380500	25965000
	Q60598	Cttn	Src substrate cortactin	8752100	274710	12771000	25917000
	P50396	Gdi1	Rab GDP dissociation inhibitor alpha	74924000	38862000	6681400	25886000
	P68368	Tuba4a	Tubulin alpha-4A chain	19904000	2010300	7187700	25694000
	P04117	Fabp4	Fatty acid-binding protein, adipocyte	38942	0	2588400	25176000
	O54931	Akap2	A-kinase anchor protein 2	0	0	3345100	25104000
	P20108	Prdx3	Thioredoxin-dependent peroxide reductase, mitochondrial	7032300	151780	6403200	24936000
	P70333	Hnrnph2	Heterogeneous nuclear ribonucleoprotein H2	150220	0	20990000	24889000
	O55131	Sept7	Septin-7	2107800	709330	12122000	24434000
	Q9QYB1	Clic4	Chloride intracellular channel protein 4	889110	72785	5244800	24359000
	Q05816	Fabp5	Fatty acid-binding protein 5	13030000	9774900	4262800	24313000
	P70296	Pebp1	Phosphatidylethanolamine-binding protein 1	165250000	2712800	11299000	23536000
	Q9DBX1	Rgcc	Regulator of cell cycle RGCC	0	0	1383800	23350000
	Q9CQV8	Ywhab	14-3-3 protein beta/alpha	46369000	8839600	4006600	22934000
	P47757	Capzb	F-actin-capping protein subunit beta	8794100	482760	2798500	22752000
	P19096	Fasn	Fatty acid synthase	804200	661240	1643600	22705000
	P17751	Tpi1	Triosephosphate isomerase	127960000	36549000	7283300	22677000
	P70349	Hint1	Histidine triad nucleotide-binding protein 1	17529000	5243400	1458100	22196000
	Q01730	Rsu1 Rsp1	Ras suppressor protein 1	0	0	2286800	22057000
	P63323	Rps12	40S ribosomal protein S12	0	0	7969300	21933000
	O55201	Supt5h	Transcription elongation factor SPT5	0	22596	5583.6	0
	P34884	Mif	Macrophage migration inhibitory factor	14245000	28864000	279710	21787000
	P13020	Gsn	Gelsolin	977120	0	9382300	21651000
	Q04447	Ckb	Creatine kinase B-type	471570000	132510000	11911000	21614000
	P09671	Sod2	Superoxide dismutase	13547000	778690	4007100	21513000
	P16045	Lgals1	Galectin-1	893580	0	3992800	21476000
	P62715	Ppp2cb	Serine/threonine-protein phosphatase 2A catalytic subunit beta isoform	875740	2994900	278140	21354000
	P13634	Ca1	Carbonic anhydrase 1	8433500	72971	5455300	21165000
	P14206	Rpsa	40S ribosomal protein SA	1969100	474610	4471900	21160000
	Q9CQR2	Rps21	40S ribosomal protein S21	14494	0	274790	20582000
	P01837	Igkc	Immunoglobulin kappa constant	2408100	0	20052000	20298000
	P01864		Ig gamma-2A chain C region secreted form	0	0	3520400	20186000
	O08908	Pik3r2	Phosphatidylinositol 3-kinase regulatory subunit beta	1111400	12828	9143300	20145000
	P63028	Tpt1	Translationally-controlled tumor protein	9632200	1392300	2052000	19889000
	O70370	Ctss	Cathepsin S	40406	0	111260	0
	Q9DBJ1	Pgam1	Phosphoglycerate mutase 1	62951000	34226000	912090	19888000
	Q8BFR5	Tufm	Elongation factor Tu, mitochondrial	495080	0	10998000	19626000
	Q00623	Apoa1	Apolipoprotein A-I	627000	523970	839490	19553000
	Q8BG05	Hnrnpa3	Heterogeneous nuclear ribonucleoprotein A3	56565	41922	4340400	19529000
	Q8VCM7	Fgg	Fibrinogen gamma chain	151620	0	1934900	19518000
	Q91X72	Hpx	Hemopexin	114340	116810	1880300	19445000
	P16125	Ldhb	L-lactate dehydrogenase B chain	186790000	52692000	3884600	19399000
	Q923D2	Blvrb	Flavin reductase (NADPH)	6552800	127360	10852000	19360000
	Q8VCW8	Acsf2	Acyl-CoA synthetase family member 2, mitochondrial	426650	28978	3137500	18847000
	Q9DAW9	Cnn3	Calponin-3	0	0	7871800	18740000
	P00761		Trypsin	342090000	3018500	297340000	18617000
	P15626	Gstm2	Glutathione S-transferase Mu 2	0	0	3377400	18440000
	Q8BHL4	Gprc5a	Retinoic acid-induced protein 3	0	0	2413400	18424000
	Q68FD5	Cltc	Clathrin heavy chain 1	10037000	13764000	1486100	18324000
	P05202	Got2	Aspartate aminotransferase, mitochondrial	10779000	17095000	3581000	18261000
	P61161	Actr2	Actin-related protein 2	2985400	481130	4079300	18192000
	Q99LC5	Etfa	Electron transfer flavoprotein subunit alpha, mitochondrial	7614900	18321	4700600	18190000
	Q61598	Gdi2	Rab GDP dissociation inhibitor beta	7403900	2306000	4797300	17818000
	O35744	Chil3	Chitinase-like protein 3	0	0	6187200	17537000
	Q61990	Pcbp2	Poly(rC)-binding protein 2	286850	0	632010	17533000
	Q9EQ20	Aldh6a1	Methylmalonate-semialdehyde dehydrogenase [acylating], mitochondrial	2724600	299040	8523100	17413000
	P51885	Lum	Lumican	0	0	5554100	17378000
	P48036	Anxa5	Annexin A5	14195000	753420	4259600	17311000
	P26039	Tln1 Tln	Talin-1	247060	4026.9	4907600	17222000
	P17225	Ptbp1	Polypyrimidine tract-binding protein 1	52365	0	6573700	17095000
	P47911	Rpl6	60S ribosomal protein L6	49175	0	497870	16847000
	P40124	Cap1	Adenylyl cyclase-associated protein 1	7004900	3127100	5359500	16728000
	Q9R1P1	Psmb3	Proteasome subunit beta type-3	4729700	840750	2046300	16708000
	Q61838	Pzp A2m	Pregnancy zone protein	3852500	1247900	2205500	16589000
	Q9JHL1	Slc9a3r2	Na(+)/H(+) exchange regulatory cofactor NHE-RF2 RY-interacting protein 1	0	0	3760900	16467000
	P38647	Hspa9	Stress-70 protein, mitochondrial	24635000	3634700	7644300	16237000
	Q922D8	Mthfd1	C-1-tetrahydrofolate synthase, cytoplasmic	3528.4	0	5806100	16176000
	O70325	Gpx4	Phospholipid hydroperoxide glutathione peroxidase	339720	0	6546200	15965000
	Q9JKP5	Mbnl1	Muscleblind-like protein 1	272170	0	4791600	15600000
	O88735	Map7	Ensconsin	60427	0	18681	0
	O88342	Wdr1	WD repeat-containing protein 1	13075000	2340000	3855800	15573000
	Q9QZS3	Numb	Protein numb homolog	0	0	1139000	15495000
	P08905	Lyz2	Lysozyme C-2	0	0	725520	15456000
	P35441	Thbs1	Thrombospondin-1	0	0	2446600	15418000
	Q9D3D9	Atp5f1d	ATP synthase subunit delta, mitochondrial	3035600	0	1576000	15204000
	Q01768	Nme2	Nucleoside diphosphate kinase B	1035000	947800	1377800	15165000
	Q8VCC1	Hpgd	15-hydroxyprostaglandin dehydrogenase	0	0	652820	15158000
	P59999	Arpc4	Actin-related protein 2/3 complex subunit 4	459970	165940	2332300	15047000
	Q9QZ06	Tollip	Toll-interacting protein	6684700	75453	1746300	14737000
	Q00915	Rbp1	Retinol-binding protein 1	291320	0	1023000	14737000
	P47753	Capza1	F-actin-capping protein subunit alpha-1	518720	387860	1321700	14582000
	P57776	Eef1d	Elongation factor 1-delta	934820	0	879790	14517000
	P58871	Tnks1bp1	182 kDa tankyrase-1-binding protein	0	0	4224500	14453000
	Q62219	Tgfb1i1	Transforming growth factor beta-1-induced transcript 1 protein	0	0	4881700	14283000
	Q05920	Pc	Pyruvate carboxylase, mitochondrial	2123600	357500	3419700	14145000
	O89112	Lancl1	LanC-like protein 1	0	0	189270	1565000
	O70400	Pdlim1	PDZ and LIM domain protein 1	54600	0	1846500	13945000
	P48758	Cbr1	Carbonyl reductase [NADPH] 1	7841000	1394400	2066700	13888000
	Q9DCD0	Pgd	6-phosphogluconate dehydrogenase, decarboxylating	953330	293220	6352000	13798000
	Q9D6F9	Tubb4a	Tubulin beta-4A chain	19950000	6244900	2159500	13706000
	P42669	Pura	Transcriptional activator protein Pur-alpha	3183500	1129300	3145400	13584000
	P62754	Rps6	40S ribosomal protein S6	0	0	163560	13309000
	O35945	Aldh1a7	Aldehyde dehydrogenase, cytosolic 1	0	0	4898900	13299000
	P01633	Igk-V19-17	Ig kappa chain V19-17	154130	0	611570	0
	O35639	Anxa3	Annexin A3	349640	0	2692600	13190000
	P01638		Ig kappa chain V-V region L6 (Fragment)	85471	0	295260	0
	Q9WVH9	Fbln5	Fibulin-5	0	0	1071300	12974000
	Q99LD8	Ddah2	N(G),N(G)-dimethylarginine dimethylaminohydrolase 2	3167100	130630	2040400	12883000
	P01872	Ighm	Immunoglobulin heavy constant mu	321530	0	5237700	12719000
	Q9JJU8	Sh3bgrl	SH3 domain-binding glutamic acid-rich-like protein	1592300	0	1001900	12703000
	P34022	Ranbp1	Ran-specific GTPase-activating protein	3338200	0	1993400	12571000
	O08749	Dld	Dihydrolipoyl dehydrogenase, mitochondrial	5710400	2494300	5863400	12542000
	P29758	Oat	Ornithine aminotransferase, mitochondrial	848890	320780	3556900	12476000
	P01843		Ig lambda-1 chain C region	64337	0	219460	0
	Q8K4Z3	Naxe	NAD(P)H-hydrate epimerase	1329400	140340	1077000	12463000
	P63001	Rac1	Ras-related C3 botulinum toxin substrate 1	415170	2766500	849690	12366000
	P21614	Gc	Vitamin D-binding protein	111310	0	6932200	12349000
	P52196	Tst	Thiosulfate sulfurtransferase	1132500	1655200	1259900	12189000
	Q8CG76	Akr7a2	Aflatoxin B1 aldehyde reductase member 2	954430	204540	490030	12185000
	P03953	Cfd	Complement factor D	0	0	1116000	12123000
	Q00897	Serpina1d	Alpha-1-antitrypsin 1-4	230240	0	10785000	11986000
	P83940	Eloc	Elongin-C	294970	0	126090	11980000
	Q8VEK3	Hnrnpu	Heterogeneous nuclear ribonucleoprotein U	711520	318510	1935800	11748000
	Q6IRU5	Cltb	Clathrin light chain B	12878000	4603900	914170	11744000
	Q9CR57	Rpl14	60S ribosomal protein L14	0	0	1737700	11591000
	P62242	Rps8	40S ribosomal protein S8	0	0	3461100	11494000
	Q99JI6	Rap1b	Ras-related protein Rap-1b	39213	250220	472360	11477000
	Q8K0E8	Fgb	Fibrinogen beta chain	74891	0	2644400	11325000
	P45376	Akr1b1	Aldose reductase	5831500	2116000	2622400	11209000
	P57780	Actn4	Alpha-actinin-4	72140	0	3092900	11097000
	P08113	Hsp90b1	Endoplasmin	2124000	265090	3827400	11097000
	Q922Y1	Ubxn1	UBX domain-containing protein 1	0	0	1445800	10845000
	Q9Z2U1	Psma5	Proteasome subunit alpha type-5	18220000	3716700	3075100	10771000
	Q91V92	Acly	ATP-citrate synthasee)	1016600	1069300	1979900	10686000
	P51174	Acadl	Long-chain specific acyl-CoA dehydrogenase, mitochondrial	1124300	313610	7343600	10675000
	Q9CPW4	Arpc5	Actin-related protein 2/3 complex subunit 5	214550	467010	177390	10624000
	Q9R0P3	Esd	S-formylglutathione hydrolase	3644800	2067800	366250	10621000
	Q61206	Pafah1b2	Platelet-activating factor acetylhydrolase IB subunit beta	9541200	358090	222440	10612000
	P04945		Ig kappa chain V-VI region NQ2-6.1	0	0	404890	5402900
	Q8BH95	Echs1	Enoyl-CoA hydratase, mitochondrial	1465900	26807	2676700	10530000
	Q9WUU7	Ctsz	Cathepsin Z	156080	204850	338750	10437000
	P27659	Rpl3	60S ribosomal protein L3	0	0	2345100	10426000
	P62814	Atp6v1b2	V-type proton ATPase subunit B, brain isoform	47026000	15820000	4032700	10404000
	O08756	Hsd17b10	3-hydroxyacyl-CoA dehydrogenase type-2	0	0	1470800	10399000
	P26443	Glud1	Glutamate dehydrogenase 1, mitochondrial	12733000	2121200	6118500	10301000
	Q9WU78	Pdcd6ip	Programmed cell death 6-interacting protein	478870	0	6077900	10064000
	Q5SSZ5	Tns3	Tensin-3	0	0	819520	10059000
	Q01853	Vcp	Transitional endoplasmic reticulum ATPase	1646800	209890	6742300	9898600
	P51859	Hdgf	Hepatoma-derived growth factor	2488700	248900	655740	9719400
	P06797	Ctsl	Cathepsin L1	188770	0	56435	0
	O88844	Idh1	Isocitrate dehydrogenase [NADP] cytoplasmic	2776400	658160	4619500	9522400
	O55103	Prx	Periaxin	0	0	5425800	9449800
	Q9Z2U0	Psma7	Proteasome subunit alpha type-7	2753200	150540	3659600	9425700
	Q9DBP5	Cmpk1	UMP-CMP kinase	15488000	880510	3656700	9415200
	Q9Z2I9	Sucla2	Succinate--CoA ligase	4783200	1852500	4195300	9388900
	P07901	Hsp90aa1	Heat shock protein HSP 90-alpha	26198000	3421000	3731200	9371800
	Q00612	G6pdx	Glucose-6-phosphate 1-dehydrogenase X	659470	0	6524800	9332700
	Q9CQR6	Ppp6c	Serine/threonine-protein phosphatase 6 catalytic subunit	34492	0	120040	9257800
	Q61792	Lasp1	LIM and SH3 domain protein 1	1747800	234590	2532400	9207700
	P08752	Gnai2	Guanine nucleotide-binding protein G(i) subunit alpha-2	401900	190700	865660	9064100
	Q60710	Samhd1	Deoxynucleoside triphosphate triphosphohydrolase SAMHD1	0	0	2085100	9054500
	P04264	KRT1	Keratin, type II cytoskeletal 1	60280000	1275900	47852000	8998800
	P49722	Psma2	Proteasome subunit alpha type-2	2514000	1327500	1267600	8976200
	Q9R062	Gyg1	Glycogenin-1	664130	379940	815740	8960500
	P50096	Impdh1	Inosine-5'-monophosphate dehydrogenase 1	0	0	4771400	8956300
	O88456	Capns1	Calpain small subunit 1	462170	0	2037600	8853400
	Q62418	Dbnl	Drebrin-like protein	3833700	309660	1955000	8704900
	P68510	Ywhah	14-3-3 protein eta	32409000	7081800	2605200	8645400
	Q9DCL9			0	248080	4186500	8594900
	P49817	Cav1	Caveolin-1	0	0	144330	8441700
	Q63918	Cavin2	Caveolae-associated protein 2	0	0	17802000	8419100
	O08677	Kng1	Kininogen-1	403200	173700	1573100	8400800
	O35215	Ddt	D-dopachrome decarboxylase	8001400	1146300	2015500	8294000
	Q61233	Lcp1	Plastin-2 (	41949	0	3592700	8276700
	P14069	S100a6	Protein S100-A6	0	0	963750	8241500
	Q99KC8	Vwa5a	von Willebrand factor A domain-containing protein 5A	51997	12242	3197900	8221400
	P14148	Rpl7	60S ribosomal protein L7	0	174170	177870	8087200
	Q9WTQ5	Akap12	A-kinase anchor protein 12	153280	29529	3639800	8061400
	P62774	Mtpn	Myotrophin	4124500	0	627640	8028000
	P29391	Ftl1	Ferritin light chain 1	639920	0	3118400	8010500
	Q9R1P3	Psmb2	Proteasome subunit beta type-2	1209400	297890	738760	8010200
	Q9QYC0	Add1	Alpha-adducin	2196800	24642	4310600	8008800
	Q9JM96	Cdc42ep4	Cdc42 effector protein 4	155310	0	4873900	7817200
	P68369	Tuba1a	Tubulin alpha-1A chain	1765600	0	2647200	7749200
	P49817	CAv1	Caveolin-1	0	0	9785600	7719500
	Q64105	Spr	Sepiapterin reductase	10096000	839640	3255600	7702500
	D3YVF0	Akap5	A-kinase anchor protein 5	3637200	96299	2762800	7698800
	P49935	Ctsh	Pro-cathepsin H	0	0	590980	7689900
	Q9D7P7	Clic3	Chloride intracellular channel protein 3	0	0	653140	7569000
	Q9R0N0	Galk1	Galactokinase	2320200	205760	4222600	7531300
	Q9CR86	Carhsp1	Calcium-regulated heat stable protein 1	151750	0	1338500	7484200
	P32020	Scp2	Non-specific lipid-transfer protein	0	0	422690	7478300
	P50295	Nat2	Arylamine N-acetyltransferase 2	0	0	633590	7427100
	P48962	Slc25a4	ADP/ATP translocase 1	0	600490	60214	7337100
	Q9D358	Acp1	Low molecular weight phosphotyrosine protein phosphatase	6657100	24551	1830900	7289400
	Q9R1P0	Psma4	Proteasome subunit alpha type-4	4173200	655380	466010	7281000
	P03977		Ig kappa chain V-III region 50S10.1	230310	0	1478900	7246500
	P45952	Acadm	Medium-chain specific acyl-CoA dehydrogenase, mitochondrial	178250	0	2750300	7220800
	Q61696	Hspa1a	Heat shock 70 kDa protein 1A	2497100	74909	4582800	7024200
	P42208	Sept2	Septin-2	0	0	6421400	7005700
	Q8BP67	Rpl24	60S ribosomal protein L24	43645	0	547950	6960800
	P24472	Gsta4	Glutathione S-transferase A4	2868300	0	3573000	6945600
	P21107	Tpm3	Tropomyosin alpha-3 chain	239880	0	1213800	6894700
	P99026	Psmb4	Proteasome subunit beta type-4	8071100	1072400	1828100	6854000
	P42125	Eci1	Enoyl-CoA delta isomerase 1, mitochondrial	1735700	225860	3920600	6780700
	P61294	Rab6b	Ras-related protein Rab-6B	4688600	1416500	145010	6751200
	Q5EBG6	Hspb6	Heat shock protein beta-6	0	0	2551500	6731900
	O09172	Gclm	Glutamate--cysteine ligase regulatory subunit	1391400	1966300	70903	6730300
	Q61081	Cdc37	Hsp90 co-chaperone Cdc37	2844400	0	1936000	6660000
	Q9DCT5	Sdf2	Stromal cell-derived factor 2	0	0	974880	6611700
	P97821	Ctsc	Dipeptidyl peptidase 1	0	0	655510	6610300
	Q8BTM8	Flna	Filamin-A (FLN-A)	24713	0	4167700	6553100
	O88712	Ctbp1	C-terminal-binding protein 1	1807300	519240	1214900	6488900
	Q9D2U9	Hist3h2ba	Histone H2B type 3-A	76735	0	195410	6450500
	Q9CXW3	Cacybp	Calcyclin-binding protein	164280	0	182920	6361600
	P37804	Tagln	Transgelin	148120	0	6360000	6332800
	P04247	Mb	Myoglobin	0	0	255070	6309800
	Q64433	Hspe1	10 kDa heat shock protein, mitochondrial	3491600	606410	1157600	6283400
	Q9JII6	Akr1a1	Alcohol dehydrogenase [NADP(+)]	6864300	1575600	1361700	6277400
	Q9D6R2	Idh3a	Isocitrate dehydrogenase [NAD] subunit alpha, mitochondrial	17349000	2270000	2854000	6168100
	P07356	Anxa2	Annexin A2	22550	0	2398000	6154500
	P01645		Ig kappa chain V-V region HP 93G7	0	0	608760	6094000
	Q8K2B3	Sdha	Succinate dehydrogenase	526970	56778	2674600	5956500
	Q8R180	Ero1a	ERO1-like protein alpha	0	0	1841000	5921500
	P70372	Elavl1	ELAV-like protein 1	0	0	1058900	5874900
	Q6PHZ2	Camk2d	Calcium/calmodulin-dependent protein kinase type II subunit delta	1386800	2121900	3202700	5819900
	Q3THS6	Mat2a	S-adenosylmethionine synthase isoform type-2	2468200	980650	2695900	5799700
	Q8CGP6	Hist1h2ah	Histone H2A type 1-H	0	172090	700430	5782600
	P19973	Lsp1	Lymphocyte-specific protein 1	0	0	1966400	5753900
	P01027	C3	Complement C3	299720	68714	2127600	5735100
	P09103	P4hb	Protein disulfide-isomerase	820270	34275	12046000	5723000
	Q63844	Mapk3	Mitogen-activated protein kinase 3	434760	102340	3700400	5686900
	Q9ESB3	Hrg	Histidine-rich glycoprotein	0	0	475750	5602000
	P23198	Cbx3	Chromobox protein homolog 3	2073100	0	3485800	5582400
	P97427	Crmp1	Dihydropyrimidinase-related protein 1	22082000	11442000	696570	5554900
	P14211	Calr	Calreticulin	300240	0	8021600	5552600
	Q8BJY1	Psmd5	26S proteasome non-ATPase regulatory subunit 5	1015900	139280	3069800	5547500
	Q9QXG4	Acss2	Acetyl-coenzyme A synthetase, cytoplasmic	0	0	491060	5434100
	Q8C1B7	Sept11	Septin-11	2318400	79100	8975800	5406400
	P42932	Cct8	T-complex protein 1 subunit theta	3763900	424400	2907900	5354200
	O55222	Ilk	Integrin-linked protein kinase	0	0	3851200	5349300
	Q8VEM8	Slc25a3	Phosphate carrier protein, mitochondrial	162790	845040	77409	5334900
	Q61425	Hadh	Hydroxyacyl-coenzyme A dehydrogenase, mitochondrial	115790	0	1504900	5314500
	Q9WUK2	Eif4h	Eukaryotic translation initiation factor 4H	3379800	121410	1276700	5292800
	Q9R1P4	Psma1	Proteasome subunit alpha type-1	5277300	950870	331860	5283600
	Q61768	Kif5b	Kinesin-1 heavy chain	725090	32501	2919000	5275700
	Q9CPR4	Rpl17	60S ribosomal protein L17	0	0	394020	5245800
	Q9ERG0	Lima1	LIM domain and actin-binding protein 1	0	0	378360	5213500
	P62334	Psmc6	26S proteasome regulatory subunit 10B	1298100	129070	2194400	5153500
	Q9CR00	Psmd9	26S proteasome non-ATPase regulatory subunit 9	3868100	0	1739300	5104500
	Q06890	Clu	Clusterin	962180	65700	3748200	5095500
	Q9JM14	Nt5c	5'(3')-deoxyribonucleotidase, cytosolic type	2393200	825610	313530	5089800
	P97807	Fh	Fumarate hydratase, mitochondrial	17787000	3918300	5140100	5072900
	P62918	Rpl8	60S ribosomal protein L8	0	0	474060	5056400
	P18872	Gnao1	Guanine nucleotide-binding protein G(o) subunit alpha	24572000	6432400	476600	5023200
	Q9D0J8	Ptms	Parathymosin	141180	523910	559500	5018200
	Q8CI51	Pdlim5	PDZ and LIM domain protein 5	0	0	1253300	5014900
	Q9DCN2	Cyb5r3	NADH-cytochrome b5 reductase 3	0	0	577890	4984800
	P01631		Ig kappa chain V-II region 26-10	403550	0	2039700	4957600
	P47963	Rpl13	60S ribosomal protein L13	0	0	2240100	4866200
	P15327	Bpgm	Bisphosphoglycerate mutase	1098500	0	741380	4850500
	Q9Z1N5	Ddx39b	Spliceosome RNA helicase Ddx39b	2671000	1509000	5497900	4817000
	P61089	Ube2n	Ubiquitin-conjugating enzyme E2 N	3675400	1193000	1516500	4790600
	Q60692	Psmb6	Proteasome subunit beta type-6	7428500	1335800	1412400	4787200
	P29341	Pabpc1	Polyadenylate-binding protein 1	81599	26628	2100800	4787000
	Q8QZT1	Acat1	Acetyl-CoA acetyltransferase, mitochondrial	239270	0	4455600	4714000
	P70288	Hdac2	Histone deacetylase 2	0	0	217460	4671700
	P14824	Anxa6	Annexin A6	223810	0	3153100	4658200
	P60843	Eif4a1	Eukaryotic initiation factor 4A-I	5511300	2917500	3201800	4621600
	P31786	Dbi	Acyl-CoA-binding protein	657600	1044000	0	4597100
	Q60668	Hnrnpd	Heterogeneous nuclear ribonucleoprotein D0	680290	0	3765300	4590700
	Q02053	Uba1	Ubiquitin-like modifier-activating enzyme 1	16873000	5210600	2228300	4570200
	Q9WUM3	Coro1b	Coronin-1B	1210300	728790	583140	4554600
	O35381	Anp32a	Acidic leucine-rich nuclear phosphoprotein 32 family member A	299680	0	1086600	4491500
	Q99L13	Hibadh	3-hydroxyisobutyrate dehydrogenase, mitochondrial	5170200	0	1280400	4490900
	P62821	Rab1A	Ras-related protein Rab-1A	2768300	482070	2147100	4482300
	P05063	Aldoc	Fructose-bisphosphate aldolase C	128890000	22313000	619310	4442600
	Q99JY3	Gimap4	GTPase IMAP family member 4	0	0	1009700	4401200
	Q8VCR7	Abhd14b	Protein ABHD14B	1089800	0	739670	4343200
	P61971	Nutf2	Nuclear transport factor 2	1126800	565690	141800	4330500
	O70591	Pfdn2	Prefoldin subunit 2	264010	64847	230540	4305300
	Q91V64	Isoc1	Isochorismatase domain-containing protein 1	514360	121290	342050	4222100
	Q9CQ65	Mtap	S-methyl-5'-thioadenosine phosphorylase	1068600	0	258830	4183400
	Q91VZ6	Smap1	Stromal membrane-associated protein 1	0	0	410050	4150900
	P62897	Cycs	Cytochrome c, somatic	2279500	2931300	145710	4106000
	P97376	Frg1	Protein FRG1	0	0	344660	4057300
	Q9CQC9	Sar1b	GTP-binding protein SAR1b	22355	0	201050	4003300
	P21981	Tgm2	Protein-glutamine gamma-glutamyltransferase 2	0	0	1981000	3995200
	P28656	Nap1l1	Nucleosome assembly protein 1-like 1	1590000	0	2454000	3922800
	P01868	Ighg1	Ig gamma-1 chain C region secreted form	682780	0	2277100	3846200
	Q8CAY6	Acat2	Acetyl-CoA acetyltransferase, cytosolic	2167600	828500	1177000	3845000
	P06801	Me1	NADP-dependent malic enzyme	1927900	619960	1864000	3835800
	Q8C4J0	Ccdc60	Coiled-coil domain-containing protein 60	0	0	1067000	3789000
	Q9ERL7	Gmfg	Glia maturation factor gamma	0	0	944380	3789000
	P00405	Mtco2	Cytochrome c oxidase subunit 2	243040	271070	523950	3733600
	Q9Z2W0	Dnpep	Aspartyl aminopeptidase	1001300	231000	3290200	3684800
	Q9R069	Bcam	Basal cell adhesion molecule	0	0	2351500	3678000
	Q61249	Igbp1	Immunoglobulin-binding protein 1	92385	0	3679800	3661200
	P35980	Rpl18	60S ribosomal protein L18	0	0	739380	3650000
	Q9JM76	Arpc3	Actin-related protein 2/3 complex subunit 3	474050	0	1686300	3577800
	Q3TJ91	Llgl2	Lethal(2) giant larvae protein homolog 2	0	0	638490	3577800
	Q99M51	Nck1	Cytoplasmic protein NCK1	7766.3	0	1931100	3558900
	P10637	Mapt	Microtubule-associated protein tau	701620	647870	592950	3542800
	Q61362	Chi3l1	Chitinase-3-like protein 1	0	0	1040500	3538400
	P01635		Ig kappa chain V-V region K2 (Fragment)	0	0	420640	3534400
	P68040	Rack1	Receptor of activated protein C kinase 1 (12-3)	367130	0	389370	3461600
	Q9CZU6	Cs	Citrate synthase, mitochondrial	542990	37804	3624700	3453400
	P12970	Rpl7a	60S ribosomal protein L7a	0	114480	63534	3434200
	Q61247	Serpinf2	Alpha-2-antiplasmin	142570	0	802160	3433900
	P24369	Ppib	Peptidyl-prolyl cis-trans isomerase B	0	0	595000	3429400
	P61982	Ywhag	14-3-3 protein gamma	60730000	2173500	2288000	3408600
	Q99JY9	Actr3	Actin-related protein 3	2076200	130210	4218200	3398900
	Q3U0V1	Khsrp	Far upstream element-binding protein 2	14767	0	999260	3374700
	P16546	Sptan1	Spectrin alpha chain, non-erythrocytic 1	2628500	70072	3209600	3372000
	Q78ZA7	Nap1l4	Nucleosome assembly protein 1-like 4	1486700	0	2588500	3372000
	Q00519	Xdh	Xanthine dehydrogenase/oxidase	0	0	654540	3336900
	Q8R1G6	Pdlim2	PDZ and LIM domain protein 2	0	0	1457300	3325900
	Q8C181	Mbnl2	Muscleblind-like protein 2	0	0	160580	3316500
	Q7TNG5	Eml2	Echinoderm microtubule-associated protein-like 2	0	0	460860	3288200
	Q8K2I3	Fmo2	Dimethylaniline monooxygenase [N-oxide-forming] 2	0	0	1006800	3273500
	Q8K354	Cbr3	Carbonyl reductase [NADPH] 3	3266700	136260	446120	3273100
	P35242	Sftpa1	Pulmonary surfactant-associated protein A	0	0	2252000	3271900
	Q9CZ44	Nsfl1c	NSFL1 cofactor p47	11440000	156290	1395300	3261900
	P17918	Pcna	Proliferating cell nuclear antigen	862970	164290	549530	3248900
	Q9R1Z8	Sorbs3	Vinexin	0	0	442150	3234200
	Q9D6Y7	Msra	Mitochondrial peptide methionine sulfoxide reductase	811380	0	2298400	3222000
	Q11136	Pepd	Xaa-Pro dipeptidase	1025800	0	350960	3220700
	P50516	Atp6v1a	V-type proton ATPase catalytic subunit A (	60341000	26834000	1224700	3209500
	Q9CT10	Ranbp3	Ran-binding protein 3	797840	0	1118000	3187800
	Q8BH69	Sephs1	Selenide, water dikinase 1	153940	0	1515200	3167500
	P01757		Ig heavy chain V region J558	0	0	1386500	3144100
	P21550	Eno3	Beta-enolase	738850	74188	2367000	3125900
	Q9R0Q7	Ptges3	Prostaglandin E synthase 3	61916	31816	178620	3123000
	P52480	Pkm	Pyruvate kinase	18036	0	489140	3058500
	O35226	Psmd4	26S proteasome non-ATPase regulatory subunit 4	3074600	48468	5383900	3054200
	P13645	KRT10 KPP	Keratin, type I cytoskeletal 10	30191000	1368700	33639000	3015800
	Q60864	Stip1	Stress-induced-phosphoprotein 1	10638000	191300	4090500	3001000
	P62717	Rpl18a	60S ribosomal protein L18a	0	0	49438	2902600
	O89103	Cd93	Complement component C1q receptor	0	0	80366	2899400
	P63242	Eif5a	Eukaryotic translation initiation factor 5A-1	1168300	0	5126500	2873200
	Q9JK83	Pard6b	Partitioning defective 6 homolog beta	0	0	2981200	2826000
	P50247	Ahcy	Adenosylhomocysteinase	4242400	1221500	5118000	2683300
	P01867	Igh-3	Ig gamma-2B chain C region	0	0	5450500	2669700
	Q9JII5	Dazap1	DAZ-associated protein 1	0	0	691710	2629400
	P11404	Fabp3	Fatty acid-binding protein, heart	27722000	128280	1001500	2579500
	Q9EPC1	Parva	Alpha-parvin	0	0	968250	2574400
	Q9JKF1	Iqgap1	Ras GTPase-activating-like protein IQGAP1	0	0	1877000	2573800
	Q9QUR6	Prep	Prolyl endopeptidase	371010	267840	516630	2559700
	Q91VI7	Rnh1	Ribonuclease inhibitor	1311400	0	1531400	2546100
	Q922F4	Tubb6	Tubulin beta-6 chain	184370	0	665580	2538300
	Q9CPV4	Glod4	Glyoxalase domain-containing protein 4	15992000	130850	568490	2537000
	P09055	Itgb1	Integrin beta-1	0	0	711650	2536300
	P10639	Txn	Thioredoxin	12889000	0	14519000	2530700
	P84078	Arf1	ADP-ribosylation factor 1	4059900	2875700	1609800	2504200
	P45591	Cfl2	Cofilin-2	4636100	1277600	880210	2501100
	Q9DC07	Nebl	LIM zinc-binding domain-containing Nebulette	10017	0	594120	2491100
	Q61646	Hp	Haptoglobin	0	0	821540	2487500
	Q99KJ8	Dctn2	Dynactin subunit 2	6406100	160190	5397800	2478800
	Q03734	Serpina3m	Serine protease inhibitor A3M	0	0	108110	2466800
	P28665	Mug1	Murinoglobulin-1	1330000	330000	678880	2458300
	Q91W69	Epn3	Epsin-3	144680	0	616910	2445000
	Q91V41	Rab14	Ras-related protein Rab-14	3803900	841880	1369900	2440500
	P32261	Serpinc1	Antithrombin-III	143770	0	4464400	2434000
	Q8R0Y6	Aldh1l1	Cytosolic 10-formyltetrahydrofolate dehydrogenase	1137100	144190	856800	2420200
	P26231	Ctnna1	Catenin alpha-1	0	13904	1441400	2412100
	P10107	Anxa1	Annexin A1	0	0	375640	2401900
	Q6IRU2	Tpm4	Tropomyosin alpha-4 chain	0	0	206870	2378700
	Q9WUM4	Coro1c	Coronin-1C	731980	503090	996010	2318200
	P97429	Anxa4	Annexin A4	0	0	821500	2315300
	Q9WV32	Arpc1b	Actin-related protein 2/3 complex subunit 1B	0	0	413040	2283300
	P15105	Glul	Glutamine synthetase	77840000	31971000	4540200	2266400
	P52760	Rida	2-iminobutanoate/2-iminopropanoate deaminase	4438200	2785200	52480	2254000
	Q61655	Ddx19a	ATP-dependent RNA helicase DDX19A	0	27212	1641900	2252800
	Q8CIN4	Pak2	Serine/threonine-protein kinase PAK 2	1556000	59585	959330	2234300
	Q8C650	Sept10	Septin-10	0	0	1353100	2207200
	P35527	KRT9	Keratin, type I cytoskeletal 9	38429000	868370	25850000	2203900
	P28661	Sept4	Septin-4	33119	0	1241200	2168200
	Q99KQ4	Nampt	Nicotinamide phosphoribosyltransferase	26194	0	1798100	2167000
	O70435	Psma3	Proteasome subunit alpha type-3	9068500	1382800	876540	2123100
	Q9JHJ0	Tmod3	Tropomodulin-3	0	0	1566100	2118600
	P07310	Ckm	Creatine kinase M-type	6349400	120890	9427000	2102700
	Q9QUM9	Psma6	Proteasome subunit alpha type-6	3103400	969270	457800	2093900
	Q99KK7	Dpp3	Dipeptidyl peptidase 3	974400	195040	332730	2093000
	P46664	Adss	Adenylosuccinate synthetase isozyme 2	3599000	2985500	388090	2080200
	Q60676	Ppp5c	Serine/threonine-protein phosphatase 5	515550	101680	630970	2072600
	Q8VI36	Pxn	Paxillin	0	0	2078700	2053900
	P25444	Rps2	40S ribosomal protein S2	0	0	98477	2047600
	Q76MZ3	Ppp2r1a	Serine/threonine-protein phosphatase 2A 65 kDa regulatory subunit A alpha isoform	5967000	880960	5456100	2047400
	P23927	Cryab	Alpha-crystallin B chain	958660	100760	695630	2037000
	P50580	Pa2g4	Proliferation-associated protein 2G4	39149	0	1239900	2031100
	P19324	Serpinh1	Serpin H1	0	0	578940	2030000
	P47791	Gsr	Glutathione reductase, mitochondrial	4311900	1016100	1659900	2016700
	Q99020	Hnrnpab	Heterogeneous nuclear ribonucleoprotein A/B	81102	0	2913000	2011500
	Q9CQI3	Gmfb	Glia maturation factor beta	2232500	578550	1878000	2006600
	Q9CVB6	Arpc2	Actin-related protein 2/3 complex subunit 2	900900	185700	339680	2005600
	P46414	Cdkn1b	Cyclin-dependent kinase inhibitor 1B	394300	0	584350	1998900
	O35887	Calu	Calumenin	0	0	2214700	1996400
	Q8K4G5	Ablim1	Actin-binding LIM protein 1	0	0	514030	1991100
	Q922R8	Pdia6	Protein disulfide-isomerase A6	161750	0	6615400	1962200
	Q99MN9	Pccb	Propionyl-CoA carboxylase beta chain, mitochondrial	772270	0	1311600	1955200
	O09106	Hdac1	Histone deacetylase 1	0	0	1347000	1953000
	Q91VR5	Ddx1	ATP-dependent RNA helicase DDX1 (	49759	0	501580	1929400
	Q9JKS4	Ldb3	LIM domain-binding protein 3	0	0	408180	1926300
	Q9CWK8	Snx2	Sorting nexin-2	1346100	197850	464040	1919800
	Q9JMH6	Txnrd1	Thioredoxin reductase 1, cytoplasmic )	796440	59196	666480	1914100
	Q6P1F6	Ppp2r2a	Serine/threonine-protein phosphatase 2A 55 kDa regulatory subunit B alpha isoform	301470	0	1752500	1913100
	Q8VDD5	Myh9	Myosin-9	3111.7	11676	694820	1910700
	P62737	Acta2	Actin, aortic smooth muscle	0	0	71478	1910300
	P62827	Ran	GTP-binding nuclear protein Ran	2091600	3046400	655840	1907700
	Q8BIJ6	Iars2	Isoleucine--tRNA ligase, mitochondrial	146850	128080	1107100	1898200
	Q7TMK9	Syncrip	Heterogeneous nuclear ribonucleoprotein Q	0	0	1088400	1871200
	Q9D1M0	Sec13	Protein SEC13 homolog	367180	326350	41394	1864000
	Q9D2G2	Dlst	Dihydrolipoyllysine-residue succinyltransferase component of 2-oxoglutarate dehydrogenase complex, mitochondrial	2268900	612670	2730100	1863800
	Q3ULD5	Mccc2	Methylcrotonoyl-CoA carboxylase beta chain, mitochondrial	0	0	1230600	1814900
	Q8VDK1	Nit1	Deaminated glutathione amidase	91172	0	19098	1813800
	Q9DBN4	P33monox	Putative monooxygenase p33MONOX	0	0	88479	1812600
	P26350	Ptma	Prothymosin alpha	0	0	356890	1807900
	Q64442	Sord	Sorbitol dehydrogenase	2576300	0	1323900	1804000
	P05977	Myl1	Myosin light chain 1/3, skeletal muscle isoform	0	0	130810	1791700
	Q9ESP1	Sdf2l1	Stromal cell-derived factor 2-like protein 1	0	0	248560	1779300
	P83741	Wnk1	Serine/threonine-protein kinase WNK1	17708	0	323360	1774400
	P26040	Ezr	Ezrin	0	0	2410000	1763000
	Q99LB6	Mat2b	Methionine adenosyltransferase 2 subunit beta	687690	339120	134850	1739800
	P62874	Gnb1	Guanine nucleotide-binding protein G(I)/G(S)/G(T) subunit beta-1	11192000	1103100	147000	1739500
	Q99L47	St13	Hsc70-interacting protein	6291400	755680	2861200	1738300
	Q64444	Ca4	Carbonic anhydrase 4	0	0	228530	1721400
	Q9CZ42	Naxd	ATP-dependent (S)-NAD(P)H-hydrate dehydratase	1860500	82341	482010	1717700
	P98078	Dab2	Disabled homolog 2	0	0	839610	1704800
	Q9CZD3	Gars	Glycine--tRNA ligase	717160	201330	942250	1702300
	Q8VDQ1	Ptgr2	Prostaglandin reductase 2	2737200	229900	348410	1687600
	P12367	Prkar2a	cAMP-dependent protein kinase type II-alpha regulatory subunit	6404900	4441400	1961800	1682400
	P05201	Got1	Aspartate aminotransferase, cytoplasmic	90965000	42611000	1549200	1666700
	P24527	Lta4h	Leukotriene A-4 hydrolase	2186100	246810	2344700	1660500
	Q60597	Ogdh	2-oxoglutarate dehydrogenase, mitochondrial	852070	379470	1380400	1653000
	Q91V76		Ester hydrolase C11orf54 homolog	1781000	0	162410	1652500
	O88685	Psmc3	26S proteasome regulatory subunit 6A	2448900	200610	4386200	1649900
	Q9QYB5	Add3 Addl	Gamma-adducin	75289	0	1018900	1647000
	P04919	Slc4a1	Band 3 anion transport protein	0	1429800	112750	1640300
	P35486	Pdha1	Pyruvate dehydrogenase E1 component subunit alpha, somatic form, mitochondrial	3431400	876990	1474400	1634700
	P61027	Rab10	Ras-related protein Rab-10	390420	78320	82688	1620300
	Q9QXT0	Cnpy2	Protein canopy homolog 2	230170	0	438130	1600900
	Q9D1Q6	Erp44	Endoplasmic reticulum resident protein 44	2033400	0	2283000	1575400
	Q9DBC7	Prkar1a	cAMP-dependent protein kinase type I-alpha regulatory subunit	1549200	38268	1749500	1572600
	P49615	Cdk5	Cyclin-dependent-like kinase 5	1060100	288980	118150	1571200
	Q8BWF0	Aldh5a1	Succinate-semialdehyde dehydrogenase, mitochondrial	5509300	2037500	771710	1558000
	P53994	Rab2a Rab2	Ras-related protein Rab-2A	3799500	500350	160220	1557700
	Q5SSZ5	Tns3	Tensin-3	0	0	140260	1549700
	Q8K0U4	Hspa12a	Heat shock 70 kDa protein 12A	1573100	1232600	558290	1546100
	P80314	Cct2	T-complex protein 1 subunit beta	4533200	365700	3181800	1543300
	P45878	Fkbp2	Peptidyl-prolyl cis-trans isomerase FKBP2	158380	0	158770	0
	Q8CHT0	Aldh4a1	Delta-1-pyrroline-5-carboxylate dehydrogenase, mitochondrial	266330	0	3011800	1522100
	Q9Z204	Hnrnpc	Heterogeneous nuclear ribonucleoproteins C1/C2	23922	0	1422500	1512000
	Q6PDN3	Mylk	Myosin light chain kinase, smooth muscle	0	0	499590	1485600
	Q6NZC7	Sec23ip	SEC23-interacting protein	197880	68957	915220	1476200
	O35864	Cops5	COP9 signalosome complex subunit 5	554800	0	565180	1460900
	Q9R111	Gda	Guanine deaminase	28860000	4377000	2139300	1453400
	Q9CY62	Rnf181	E3 ubiquitin-protein ligase RNF181	1546300	0	1681300	1422800
	O35295	Purb	Transcriptional activator protein Pur-beta	545840	29862	1003500	1420400
	P46656	Fdx1	Adrenodoxin, mitochondrial	15848	0	102470	0
	Q64471	Gstt1	Glutathione S-transferase theta-1	0	0	97102	1414200
	Q3UMF0	Cobll1	Cordon-bleu protein-like 1	0	0	1604200	1407500
	P01899	H2-D1	H-2 class I histocompatibility antigen, D-B alpha chain	0	0	337220	1399100
	Q8K310	Matr3	Matrin-3	103290	36242	380730	1398400
	Q9D5V6	Syap1	Synapse-associated protein 1	0	0	168010	1379300
	Q3UJP5		Protein C8orf37 homolog	0	0	117350	1374100
	P63085	Mapk1	Mitogen-activated protein kinase 1	381750	0	385480	1364300
	Q61210	Arhgef1	Rho guanine nucleotide exchange factor 1	0	0	363670	1359800
	Q9JJG0	Tacc2	Transforming acidic coiled-coil-containing protein 2	0	0	58906	1353600
	Q99KP3	Cryl1	Lambda-crystallin homolog	1297300	89294	122370	1349300
	Q60631	Grb2	Growth factor receptor-bound protein 2	3917400	308680	2106600	1334400
	Q8CGA0	Ppm1f	Protein phosphatase 1F	844270	243320	624320	1333500
	Q8BP48	Metap1	Methionine aminopeptidase 1	0	0	263870	1327800
	P26645	Marcks	Myristoylated alanine-rich C-kinase substrate (MARCKS)	728090	1737900	900110	1327300
	P35908	KRT2	Keratin, type II cytoskeletal 2 epidermal	12682000	220540	9896000	1327000
	Q91VR2	Atp5f1c	ATP synthase subunit gamma, mitochondrial	222390	0	323410	1323700
	Q6PEB6	Mob4	MOB-like protein phocein	0	0	883430	1316400
	P35123	Usp4	Ubiquitin carboxyl-terminal hydrolase 4	0	0	350980	1315700
	P26043	Rdx	Radixin	7411.4	0	2188000	1308100
	Q99J08	Sec14l2	SEC14-like protein 2	579190	48758	3455100	1307600
	Q60972	Rbbp4	Histone-binding protein RBBP4	176660	0	898860	1298300
	Q9Z1J3	Nfs1	Cysteine desulfurase, mitochondrial	0	0	2114800	1287900
	Q06770	Serpina6	Corticosteroid-binding globulin (	0	0	922830	1272300
	Q8BVI4	Qdpr	Dihydropteridine reductase	10835000	3394400	1479800	1264200
	O55106	Strn	Striatin	48674	0	1446600	1259400
	Q9CWS0	Ddah1	N(G),N(G)-dimethylarginine dimethylaminohydrolase 1	23629000	6629300	359410	1255800
	P27546	Map4	Microtubule-associated protein 4	68378	19821	1960200	1244600
	Q9CZ30	Ola1	Obg-like ATPase 1	438960	42633	869030	1241000
	P48437	Prox1	Prospero homeobox protein 1	91802	0	52080	0
	Q9ERG2	Strn3	Striatin-3	52485	0	438310	1234300
	Q9EQH3	Vps35	Vacuolar protein sorting-associated protein 35	908250	402190	948570	1213400
	P97494	Gclc	Glutamate--cysteine ligase catalytic subunit	342310	95394	411210	1212600
	P28651	Ca8	Carbonic anhydrase-related protein	628920	0	46119	1204900
	Q8K010	Oplah	5-oxoprolinase	0	0	297370	1201700
	Q99KV1	Dnajb11	DnaJ homolog subfamily B member 11	314890	0	6848200	1198000
	Q91XU3	Pip4k2c	Phosphatidylinositol 5-phosphate 4-kinase type-2 gamma	35894	0	413490	1197000
	Q5SRX1	Tom1l2	TOM1-like protein 2	2243200	286720	102170	1193100
	P45377	Akr1b8	Aldose reductase-related protein 2	78506	73793	86652	1186200
	P09470	Ace	Angiotensin-converting enzyme	0	0	171170	1179100
	Q9D172	D10Jhu81e	ES1 protein homolog, mitochondrial	5651400	1469300	2360100	1165100
	Q9QWR8	Naga	Alpha-N-acetylgalactosaminidase	0	0	169460	1157800
	Q9EQF6	Dpysl5	Dihydropyrimidinase-related protein 5	8990200	1582700	152540	1157300
	Q91W89	Man2c1	Alpha-mannosidase 2C1	8828.3	7123.8	275440	1150300
	Q3U7U3	Fbxo7	F-box only protein 7	0	0	58104	1144100
	Q5SWU9	Acaca	Acetyl-CoA carboxylase 1	0	0	235590	1143800
	Q62318	Trim28	Transcription intermediary factor 1-beta	312330	125560	725370	1142700
	Q9DCR2	Ap3s1	AP-3 complex subunit sigma-1	49078	0	68344	1133100
	P97372	Psme2	Proteasome activator complex subunit 2	0	0	183810	1130600
	O54865	Gucy1b1	Guanylate cyclase soluble subunit beta-1	24865	27371	1073800	1113800
	Q68FH4	Galk2	N-acetylgalactosamine kinase	159960	0	220490	1104800
	O08529	Capn2	Calpain-2 catalytic subunit	15232	0	819280	1080000
	Q9Z2A5	Ate1	Arginyl-tRNA--protein transferase 1	0	0	234130	1079600
	P70460	Vasp	Vasodilator-stimulated phosphoprotein	0	0	311070	1049000
	Q9CWJ9	Atic	Bifunctional purine biosynthesis protein PURH	2576300	292540	1924900	1048000
	Q7M6Y3	Picalm	Phosphatidylinositol-binding clathrin assembly protein	0	0	229420	1046700
	Q8C5L3	Cnot2	CCR4-NOT transcription complex subunit 2	0	0	172370	1041500
	Q8CGK3	Lonp1	Lon protease homolog, mitochondrial	6590.5	0	728570	1041000
	Q9EQU5	Set	Protein SET	278270	0	1767900	1038600
	O35098	Dpysl4	Dihydropyrimidinase-related protein 4	6990700	1893700	667540	1033400
	P13707	Gpd1	Glycerol-3-phosphate dehydrogenase [NAD(+)], cytoplasmic	34724000	3438500	632830	1027300
	Q810U5	Ccdc50	Coiled-coil domain-containing protein 50	0	0	109960	1008800
	O88447	Klc1	Kinesin light chain 1	725560	0	2243000	1008000
	O88487	Dync1i2	Cytoplasmic dynein 1 intermediate chain 2	700910	0	1624500	1006100
	Q91VD9	Ndufs1	NADH-ubiquinone oxidoreductase 75 kDa subunit, mitochondrial	288030	16034	803950	1005800
	Q91VH2	Snx9	Sorting nexin-9	0	0	27431	989870
	P63328	Ppp3ca	Serine/threonine-protein phosphatase 2B catalytic subunit alpha isoform	32296000	2385900	589960	989690
	Q61147	Cp	Ceruloplasmin	52671	0	567450	984650
	P63037	Dnaja1	DnaJ homolog subfamily A member 1	0	0	1185600	974390
	P47739	Aldh3a1	Aldehyde dehydrogenase, dimeric NADP-preferring	0	0	587400	965560
	Q99KB8	Hagh	Hydroxyacylglutathione hydrolase, mitochondrial	6875800	1085600	284980	953950
	Q9WVG6	Carm1	Histone-arginine methyltransferase CARM1	96447	119550	61720	951580
	P42227	Stat3	Signal transducer and activator of transcription 3	4323.2	9082.1	424300	948670
	P49312	Hnrnpa1	Heterogeneous nuclear ribonucleoprotein A1	53149	0	346200	940770
	Q9QZD9	Eif3i	Eukaryotic translation initiation factor 3 subunit I	394940	0	234580	935770
	P61358	Rpl27	60S ribosomal protein L27	73822	0	566300	927100
	Q01405	Sec23a	Protein transport protein Sec23A	4923.4	7923.4	410640	913670
	Q9DCC4	Pycr3 Pycrl	Pyrroline-5-carboxylate reductase 3	321540	0	482600	912760
	Q8CI94	Pygb	Glycogen phosphorylase, brain form	4394700	3018500	737260	909060
	Q9EPJ9	Arfgap1	ADP-ribosylation factor GTPase-activating protein 1	202560	1308500	94391	901780
	P63087	Ppp1cc	Serine/threonine-protein phosphatase PP1-gamma catalytic subunit	1642300	345150	140360	897430
	O70475	Ugdh	UDP-glucose 6-dehydrogenase	0	0	395530	891070
	Q61316	Hspa4	Heat shock 70 kDa protein 4	13490000	2106300	2389900	885520
	P56399	Usp5	Ubiquitin carboxyl-terminal hydrolase 5	4228200	740190	1188100	878570
	Q9JI11	Stk4	Serine/threonine-protein kinase 4	0	0	658620	872760
	Q9DB77	Uqcrc2	Cytochrome b-c1 complex subunit 2, mitochondrial	97579	264200	998360	870450
	P21300	Akr1b7	Aldose reductase-related protein 1	0	0	15832	863380
	Q99LI8	Hgs	Hepatocyte growth factor-regulated tyrosine kinase substrate	292890	31537	17571	861310
	Q8CFX1	H6pd	GDH/6PGL endoplasmic bifunctional protein	0	0	164020	860110
	Q9ERD7	Tubb3	Tubulin beta-3 chain	23212000	10064000	881740	857400
	P11983	Tcp1	T-complex protein 1 subunit alpha	1853000	289980	1708400	854540
	P62281	Rps11	40S ribosomal protein S11	0	0	291010	849290
	P70168	Kpnb1	Importin subunit beta-1	286600	130300	311510	836990
	Q8R4H2	Arhgef12	Rho guanine nucleotide exchange factor 12	0	0	140030	827960
	P17156	Hspa2	Heat shock-related 70 kDa protein 2 (	3028900	253580	1336900	825300
	Q9ET54	Palld	Palladin	0	0	865950	820100
	Q04207	Rela	Transcription factor p65	0	0	141490	818870
	Q6P069	Sri	Sorcin	1074400	0	1391700	815730
	P35831	Ptpn12	Tyrosine-protein phosphatase non-receptor type 12	0	0	79257	807030
	Q99KH8	Stk24	Serine/threonine-protein kinase 24	123260	0	304960	803280
	P80315	Cct4	T-complex protein 1 subunit delta	1096200	449500	833670	795540
	Q9D0E1	Hnrnpm	Heterogeneous nuclear ribonucleoprotein M	42014	0	734470	793660
	P61202	Cops2	COP9 signalosome complex subunit 2	78306	0	891630	792500
	Q9WTM5	Ruvbl2	RuvB-like 2	0	0	2016000	791570
	Q9QZ08	Nagk	N-acetyl-D-glucosamine kinase	880840	0	255770	790700
	Q8R016	Blmh	Bleomycin hydrolase	1399100	213860	333200	783240
	Q91W92	Cdc42ep1	Cdc42 effector protein 1	0	0	358760	780920
	Q3UEB3	Puf60	Poly(U)-binding-splicing factor PUF60	141040	0	3210.2	774060
	P70268	Pkn1	Serine/threonine-protein kinase N1	0	0	235070	771530
	A3KMP2	Ttc38	Tetratricopeptide repeat protein 38	0	0	325320	770070
	P62317	Snrpd2	Small nuclear ribonucleoprotein Sm D2	25583	0	353060	758400
	P62960	Ybx1	Nuclease-sensitive element-binding protein 1	75879	0	1975700	753010
	P51125	Cast	Calpastatin	0	0	218440	751360
	Q9D0F9	Pgm1	Phosphoglucomutase-1	4801200	1748200	1715000	743580
	P41105	Rpl28	60S ribosomal protein L28	0	0	197640	734790
	Q9WVE8	Pacsin2	Protein kinase C and casein kinase substrate in neurons protein 2	32390	0	372900	734690
	P80316	Cct5	T-complex protein 1 subunit epsilon	3133700	80275	3407700	733440
	P42567	Eps15	Epidermal growth factor receptor substrate 15	0	0	468940	730150
	P54728	Rad23b	UV excision repair protein RAD23 homolog B	6968100	55518	2053800	716490
	Q8VDM4	Psmd2	26S proteasome non-ATPase regulatory subunit 2	231030	6352.1	1555400	715510
	Q3THK7	Gmps	GMP synthase [glutamine-hydrolyzing]	1179100	419350	702930	713650
	Q7TPR4	Actn1	Alpha-actinin-1	9733	0	1425300	703860
	Q99NB1	Acss1	Acetyl-coenzyme A synthetase 2-like, mitochondrial	0	17308	434230	702030
	Q9CY58	Serbp1	Plasminogen activator inhibitor 1 RNA-binding protein	59438	0	582850	699550
	O70311	Nmt2	Glycylpeptide N-tetradecanoyltransferase 2	0	0	100520	695610
	Q91ZA3	Pcca	Propionyl-CoA carboxylase alpha chain, mitochondrial	1312900	29537	1134000	694750
	Q3UV17	Krt76	Keratin, type II cytoskeletal 2 oral	5276500	0	4878900	692860
	Q5FWK3	Arhgap1	Rho GTPase-activating protein 1	474780	420390	380850	685570
	O35350	Capn1	Calpain-1 catalytic subunit	9719.7	0	381170	674530
	Q6ZWN5	Rps9	40S ribosomal protein S9	0	0	285500	670690
	Q11011	Npepps	Puromycin-sensitive aminopeptidase	4677900	726560	390470	668750
	A6X8Z5	Arhgap31	Rho GTPase-activating protein 31	0	0	262230	666790
	Q3U1J4	Ddb1	DNA damage-binding protein 1	25979	0	633440	663320
	P02533	KRT14	Keratin, type I cytoskeletal 14	2994400	0	2151900	657170
	Q9CPY7	Lap3	Cytosol aminopeptidase	3482700	916340	958330	650690
	Q6ZWX6	Eif2s1	Eukaryotic translation initiation factor 2 subunit 1	496710	0	96657	648430
	P47962	Rpl5	60S ribosomal protein L5	0	0	927580	643860
	Q9ESL4	Map3k20	Mitogen-activated protein kinase kinase kinase 20	0	0	353230	638520
	Q6P5E4	Uggt1	UDP-glucose:glycoprotein glucosyltransferase 1	11800	0	301230	638240
	P49443	Ppm1a	Protein phosphatase 1A	3084500	567140	568910	621340
	O88543	Cops3	COP9 signalosome complex subunit 3	11505	166540	478660	615410
	P11679	Krt8	Keratin, type II cytoskeletal 8	3921.5	0	465590	606540
	P60898	Polr2i	DNA-directed RNA polymerase II subunit RPB9	30395	0	142060	0
	P17710	Hk1	Hexokinase-1	1294800	539010	1038400	606380
	P16460	Ass1	Argininosuccinate synthase	122140	35717	577160	605820
	P62196	Psmc5	26S proteasome regulatory subunit 8	540180	0	1152000	603980
	Q9DBS5	Klc4	Kinesin light chain 4	0	0	107520	593680
	Q8R081	Hnrnpl	Heterogeneous nuclear ribonucleoprotein L	0	0	868030	569180
	Q61699	Hsph1	Heat shock protein 105 kDa	6649100	1535600	543050	551710
	Q9D8N0	Eef1g	Elongation factor 1-gamma	758280	2139600	1199500	550200
	Q9QXY6	Ehd3	EH domain-containing protein 3	367180	45627	216160	548700
	P62141	Ppp1cb	Serine/threonine-protein phosphatase PP1-beta catalytic subunit	2238100	377180	400250	536000
	Q9EQG3	Scel	Sciellin	0	0	50790	531890
	O89086	Rbm3	RNA-binding protein 3	151990	0	669860	528670
	Q9Z1Q9	Vars	Valine--tRNA ligase	44740	93803	143920	528470
	Q9WUM5	Suclg1	Succinate--CoA ligase [ADP/GDP-forming] subunit alpha, mitochondrial	694460	1460300	220070	520780
	Q9D1A2	Cndp2	Cytosolic non-specific dipeptidase	10004000	564200	7709600	515880
	Q3UPL0	Sec31a	Protein transport protein Sec31A	0	64434	83993	515850
	Q61035	Hars	Histidine--tRNA ligase, cytoplasmic	0	0	448840	511040
	P97855	G3bp1	Ras GTPase-activating protein-binding protein 1	0	0	120620	508600
	Q9D0K2	Oxct1	Succinyl-CoA:3-ketoacid coenzyme A transferase 1, mitochondrial	5842800	553310	2453600	504000
	Q6ZQ38	Cand1	Cullin-associated NEDD8-dissociated protein 1	548330	296410	113510	499290
	Q61703	Itih2	Inter-alpha-trypsin inhibitor heavy chain H2	0	0	79840	490840
	Q501J7	Phactr4	Phosphatase and actin regulator 4	0	0	37502	486540
	Q921M3	Sf3b3	Splicing factor 3B subunit 3	0	0	148180	483090
	O55234	Psmb5	Proteasome subunit beta type-5	229200	759680	94019	482490
	Q8BHN3	Ganab	Neutral alpha-glucosidase AB	9305.5	0	577360	477940
	Q3UZ39	Lrrfip1	Leucine-rich repeat flightless-interacting protein 1	0	0	353110	472840
	Q9ERL9	Gucy1a1	Guanylate cyclase soluble subunit alpha-1	0	0	516520	472110
	P61963	Dcaf7	DDB1- and CUL4-associated factor 7	25776	0	70761	0
	Q7TQH0	Atxn2l	Ataxin-2-like protein	0	0	13747	471590
	Q8VCT3	Rnpep	Aminopeptidase B	505210	106560	615750	469750
	P30416	Fkbp4	Peptidyl-prolyl cis-trans isomerase FKBP4	1329700	108630	1193300	462260
	P46471	Psmc2	26S proteasome regulatory subunit 7	526230	0	1711000	459310
	Q6P8J7	Ckmt2	Creatine kinase S-type, mitochondrial	0	0	1084800	456920
	P04186	Cfb Bf	Complement factor B	0	0	512070	453840
	P46460	Nsf	Vesicle-fusing ATPase	19257000	2930800	799870	450240
	O88448	Klc2	Kinesin light chain 2 (KLC 2)	121860	0	193300	449770
	P10493	Nid1	Nidogen-1	0	0	229260	447150
	Q9DBR7	Ppp1r12a	Protein phosphatase 1 regulatory subunit 12A	0	7245.8	70180	445520
	P31001	Des	Desmin	0	0	679840	445280
	Q9Z0M6	Cd97	CD97 antigen	0	0	68938	444120
	Q62095	Ddx3y	ATP-dependent RNA helicase DDX3Y	0	0	953340	439430
	Q9WTR5	Cdh13	Cadherin-13	204240	0	205560	438310
	P48678	Lmna	Prelamin-A/C	397590	0	494730	438280
	Q8K4L3	Svil	Supervillin	0	0	77581	432370
	Q99JW4	Lims1	LIM and senescent cell antigen-like-containing domain protein 1	0	0	480380	431540
	P60122	Ruvbl1	RuvB-like 1	14372	0	2169300	427190
	P62307	Snrpf	Small nuclear ribonucleoprotein F	0	0	105320	1567500
	P51855	Gss	Glutathione synthetase	456770	92540	1023100	414830
	Q3TW96	Uap1l1	UDP-N-acetylhexosamine pyrophosphorylase-like protein 1	187150	0	525930	405390
	O35601	Fyb1	FYN-binding protein 1	0	0	412290	391100
	Q9D0I9	Rars	Arginine--tRNA ligase, cytoplasmic	156800	7446.4	273630	380330
	Q9WTX5	Skp1	S-phase kinase-associated protein 1	2684000	0	2268500	380020
	P06909	Cfh	Complement factor H	0	0	130740	379540
	Q05BC3	Eml1	Echinoderm microtubule-associated protein-like 1	0	0	204170	371410
	Q8BMS1	Hadha	Trifunctional enzyme subunit alpha, mitochondrial	0	0	330390	371130
	P62702	Rps4x	40S ribosomal protein S4, X isoform	0	49725	34770	0
	Q8R050	Gspt1	Eukaryotic peptide chain release factor GTP-binding subunit ERF3A	240020	0	113350	369410
	Q3UI43	Babam1	BRISC and BRCA1-A complex member 1	0	0	152290	365130
	Q9QXD8	Limd1	LIM domain-containing protein 1	0	0	326680	352100
	O55029	Copb2	Coatomer subunit beta' )	3333.7	10651	152130	351930
	Q9Z0U1	Tjp2	Tight junction protein ZO-2	0	0	97086	348010
	P97434	Mprip	Myosin phosphatase Rho-interacting protein	0	0	305620	344910
	Q6PDM2	Srsf1	Serine/arginine-rich splicing factor 1	974040	0	66338	344790
	P47226	Tes	Testin	0	0	170170	338400
	Q62261	Sptbn1	Spectrin beta chain, non-erythrocytic 1	398300	40516	705970	338080
	Q99PL5	Rrbp1	Ribosome-binding protein 1	0	0	119520	336490
	Q8BK67	Rcc2	Protein RCC2	0	0	321690	332640
	P62137	Ppp1ca	Serine/threonine-protein phosphatase PP1-alpha catalytic subunit	1672400	75943	383910	330140
	Q9JLV1	Bag3	BAG family molecular chaperone regulator 3	0	0	72043	322670
	Q9Z1R2	Bag6	Large proline-rich protein BAG6	302130	0	100530	315760
	Q3UMY5	Eml4	Echinoderm microtubule-associated protein-like 4	0	0	68458	309740
	Q9R059	Fhl3	Four and a half LIM domains protein 3	128150	0	53639	308460
	Q8BMF4	Dlat	Dihydrolipoyllysine-residue acetyltransferase component of pyruvate dehydrogenase complex, mitochondrial	4991100	698560	1885000	307400
	O70492	Snx3	Sorting nexin-3	1225800	444010	306400	299030
	Q9DAR7	Dcps	m7GpppX diphosphatase	1404900	340830	118960	291720
	Q9WVQ5	Apip	Methylthioribulose-1-phosphate dehydratase	108490	0	138390	291450
	P53395	Dbt	Lipoamide acyltransferase component of branched-chain alpha-keto acid dehydrogenase complex, mitochondrial	8961.2	0	79841	291440
	Q7TSV4	Pgm2	Phosphoglucomutase-2	0	0	256040	283620
	D3Z6Q9	Bin2	Bridging integrator 2	0	0	235490	278120
	P28271	Aco1	Cytoplasmic aconitate hydratase	0	9028.6	376010	273930
	Q8C0D5	Efl1	Elongation factor-like GTPase 1	65637	0	64563	271900
	P28652	Camk2b	Calcium/calmodulin-dependent protein kinase type II subunit beta	489470	108070	0	267680
	Q8R5H1	Usp15	Ubiquitin carboxyl-terminal hydrolase 15	0	0	273470	266410
	P37040	Por	NADPH--cytochrome P450 reductase	0	0	170540	238160
	Q8BU30	Iars	Isoleucine--tRNA ligase, cytoplasmic	0	0	31279	238160
	Q8BXR9	Osbpl6	Oxysterol-binding protein-related protein 6	0	0	58919	233050
	Q922H4	Gmppa	Mannose-1-phosphate guanyltransferase alpha	0	0	324540	223210
	Q6ZPZ3	Zc3h4	Zinc finger CCCH domain-containing protein 4	0	0	77471	222540
	Q8R146	Apeh	Acylamino-acid-releasing enzyme	0	0	501980	221390
	Q3UFK8	Frmd8	FERM domain-containing protein 8	0	0	20328	218450
	Q6P5H2	Nes	Nestin	0	0	155820	217400
	Q8BL66	Eea1	Early endosome antigen 1	1684200	12727	1187900	217280
	Q9JHU4	Dync1h1	Cytoplasmic dynein 1 heavy chain 1	0	695440	55564	214500
	P28474	Adh5	Alcohol dehydrogenase class-3	878060	465810	259880	210000
	P59808	Sash1	SAM and SH3 domain-containing protein 1	0	0	132730	198940
	Q9CZC8	Scrn1	Secernin-1	16847000	802710	172440	188870
	Q8VHX6	Flnc	Filamin-C	0	0	52735	175060
	Q9JHU9	Isyna1	Inositol-3-phosphate synthase 1	804280	154620	588180	173420
	P80318	Cct3	T-complex protein 1 subunit gamma	1297000	84188	1272900	165650
	Q8R1B4	Eif3c	Eukaryotic translation initiation factor 3 subunit C	11218	0	119690	160490
	Q99L88	Sntb1	Beta-1-syntrophin	0	0	177660	158120
	Q8K296	Mtmr3	Myotubularin-related protein 3	0	0	12162	156110
	O09131	Gsto1	Glutathione S-transferase omega-1	596510	17534	1719500	151820
	Q8BKZ9	Pdhx	Pyruvate dehydrogenase protein X component, mitochondrial	1837300	182750	928100	147940
	Q9JL26	Fmnl1	Formin-like protein 1	0	0	255570	147340
	Q8CCN5	Bcas3	Breast carcinoma-amplified sequence 3 homolog	0	0	4645.9	137180
	Q8C0E2	Vps26b	Vacuolar protein sorting-associated protein 26B	2430400	95300	466000	136840
	Q8BGD9	Eif4b	Eukaryotic translation initiation factor 4B	1008300	228790	493930	133010
	Q9QXZ0	Macf1	Microtubule-actin cross-linking factor 1	0	0	136530	123850
	O55137	Acot1	Acyl-coenzyme A thioesterase 1	561770	185400	1469300	122840
	Q8CGC7	Eprs	Bifunctional glutamate/proline--tRNA ligase	22953	0	267160	122450
	P39447	Tjp1	Tight junction protein ZO-1	0	0	85619	119060
	Q80X90	Flnb	Filamin-B	0	0	198500	118700
	P68033	Actc1	Actin, alpha cardiac muscle 1	11753000	0	113110000	642970000
	Q05793	Hspg2	Basement membrane-specific heparan sulfate proteoglycan core protein	6910	0	71844	114690
	P14873	Map1b	Microtubule-associated protein 1B	3582600	255700	102500	112230
	O70251	Eef1b	Elongation factor 1-beta	1355800	510090	792230	111580
	P36993	Ppm1b	Protein phosphatase 1B )	381290	47798	485010	111470
	Q62074	Prkci	Protein kinase C iota type	0	0	304630	109170
	O54988	Slk	STE20-like serine/threonine-protein kinase	193880	0	612190	108760
	P55937	Golga3	Golgin subfamily A member 3	0	0	42470	107640
	Q80UW5	Cdc42bpg	Serine/threonine-protein kinase MRCK gamma	0	0	266270	96935
	Q08879	Fbln1	Fibulin-1	0	0	198350	82917
	P32067	Ssb	Lupus La protein homolog	0	0	286670	74704
	Q9WTI7	Myo1c	Unconventional myosin-Ic	0	0	462660	71860
	Q8C052	Map1s	Microtubule-associated protein 1S	0	0	32701	67752
	Q6PAJ1	Bcr	Breakpoint cluster region protein	13986	0	0	50840
	Q921M7	Fam49b	Protein FAM49B	6187600	4232800	149510	44611
	Q9CQ60	Pgls	6-phosphogluconolactonase	2199600	153400	1575200	32041
	Q70FJ1	Akap9	A-kinase anchor protein 9	1037.4	0	0	28129
	Q9DBZ5	Eif3k	Eukaryotic translation initiation factor 3 subunit K	80922	0	291690	26295
	P55264	Adk	Adenosine kinase (	841830	211540	1188400	25165
	P70236	Map2k6	Dual specificity mitogen-activated protein kinase kinase 6	25230	0	21684	0
	Q9WUZ9	Entpd5	Ectonucleoside triphosphate diphosphohydrolase 5	0	0	1010500	7178.3
	Q3UMF0	Cobll1	Cordon-bleu protein-like 1	0	0	4884.5	7146
	P47856	Gfpt1	Glutamine--fructose-6-phosphate aminotransferase [isomerizing] 1	0	120420	346550	4055.3
	Q9DBG3	Ap2b1	AP-2 complex subunit beta	2951700	503230	50284	1859.8
	Q8CGB6	Tns2	Tensin-2	0	0	65727	1852.8
	P62192	Psmc1	26S proteasome regulatory subunit 4	36996	0	1231300	0
	P80317	Cct6a	T-complex protein 1 subunit zeta	2290800	66304	1622300	0
	P14685	Psmd3	26S proteasome non-ATPase regulatory subunit 3	97501	167230	467980	0
	P26638	Sars	Serine--tRNA ligase, cytoplasmic	667510	41482	689470	0
	P80313	Cct7	T-complex protein 1 subunit eta	1717700	82188	592010	0
	P35235	Ptpn11	Tyrosine-protein phosphatase non-receptor type 11	529790	84903	359760	0
	P02662	CSN1S1	Alpha-S1-casein	11453000	7332200	2674800	0
	P09405	Ncl	Nucleolin	1544200	52997	957500	0
	Q8C166	Cpne1	Copine-1	148490	33343	359600	0
	Q9JMA1	Usp14	Ubiquitin carboxyl-terminal hydrolase 14	3026700	1504300	367220	0
	P70697	Urod	Uroporphyrinogen decarboxylase	30731	0	67811	0
	Q8BFZ3	Actbl2	Beta-actin-like protein 2	74351000	1583700	140700000	0
	Q8BP27	Sfr1	Swi5-dependent recombination DNA repair protein 1 homolog	25147	0	770010	0
	Q5XJY5	Arcn1	Coatomer subunit delta	14504	0	260280	0
	Q8BIW1	Prune1	Exopolyphosphatase PRUNE1	644660	0	415200	0
	Q3TIR3	Ric8a	Synembryn-A	19749	0	238380	0
	Q61753	Phgdh	D-3-phosphoglycerate dehydrogenase	11309000	3163200	265190	0
	Q80SW1	Ahcyl1	S-adenosylhomocysteine hydrolase-like protein 1	1236700	213610	294740	0
	O89053	Coro1a	Coronin-1A	9228800	113650	2627300	0
	Q8VBW6	Nae1	NEDD8-activating enzyme E1 regulatory subunit	180850	106820	194370	0
	P05480	Src	Neuronal proto-oncogene tyrosine-protein kinase Src	40102	0	266260	0
	Q8CHH9	Sept8	Septin-8	135530	0	1400800	0
	Q8R1Q8	Dync1li1	Cytoplasmic dynein 1 light intermediate chain 1	827070	0	439440	0
	Q3UHD6	Snx27	Sorting nexin-27	121960	0	79350	0
	Q6P9R2	Oxsr1	Serine/threonine-protein kinase OSR1 (	14601	0	69170	0
	O88643	Pak1	Serine/threonine-protein kinase PAK 1	13986000	1950100	325810	0
	P62984	Uba52	Ubiquitin-60S ribosomal protein L40	38993000	1281500	11964000	0
	O08539	Bin1	Myc box-dependent-interacting protein 1	5150200	1168100	223960	0
	P02668	CSN3	Kappa-casein	716290	1454300	159640	0
	P48453	Ppp3cb	Serine/threonine-protein phosphatase 2B catalytic subunit beta isoform	1881900	528120	109220	0
	Q9DBF1	Aldh7a1	Alpha-aminoadipic semialdehyde dehydrogenase	437470	191580	282120	0
	O70310	Nmt1	Glycylpeptide N-tetradecanoyltransferase 1	0	106770	82248	0
	Q9CYR6	Pgm3	Phosphoacetylglucosamine mutase	149200	66322	21320	0
	P70297	Stam	Signal transducing adapter molecule 1	1517900	63034	381350	0
	Q91YJ2	Snx4	Sorting nexin-4	16792	24574	138090	0
	P02663	CSN1S2	Alpha-S2-casein	2819000	1263500	308520	0
	O88746	Tom1	Target of Myb protein 1	1209000	24478	671810	0
	Q3UYC0	Ppm1h	Protein phosphatase 1H	103980	0	327110	0
	Q91W90	Txndc5	Thioredoxin domain-containing protein 5	45222	0	687670	0
	Q9WV80	Snx1	Sorting nexin-1	1134700	0	1481900	0
	Q6P8X1	Snx6	Sorting nexin-6	142640	0	844480	0
	P59325	Eif5	Eukaryotic translation initiation factor 5	2261000	0	637350	0
	P54822	Adsl	Adenylosuccinate lyase	79627	0	691970	0
	Q8BH04	Pck2	Phosphoenolpyruvate carboxykinase	87725	0	145500	0
	Q8JZN5	Acad9	Acyl-CoA dehydrogenase family member 9, mitochondrial	137390	0	63581	0
	Q9WV34	Mpp2	MAGUK p55 subfamily member 2	83030	0	68130	0
	Q8VE47	Uba5	Ubiquitin-like modifier-activating enzyme 5	2675200	926470	656230	0
	Q91ZJ5	Ugp2	UTP--glucose-1-phosphate uridylyltransferase	3162200	529190	836410	0
	Q8CBY8	Dctn4	Dynactin subunit 4	0	148570	62153	0
	Q9D0L8	Rnmt	mRNA cap guanine-N7 methyltransferase	121620	45270	53617	0
	Q61036	Pak3	Serine/threonine-protein kinase PAK 3	1942200	33253	81003	0
	Q9QXE7	Tbl1x	F-box-like/WD repeat-containing protein TBL1X (Transducin beta-like protein 1X)	0	32140	34408	0
	Q9JJK2	Lancl2	LanC-like protein 2	66498	16044	991430	0
	Q68FF6	Git1	ARF GTPase-activating protein GIT1	4858.1	0	115910	0
	Q9CZS1	Aldh1b1	Aldehyde dehydrogenase X, mitochondrial	45424	0	678040	0
	P53657	Pklr	Pyruvate kinase PKLR	293270	0	36095	0
	Q8BWG8	Arrb1	Beta-arrestin-1	52806	0	256740	0
	Q68FL4	Ahcyl2	Putative adenosylhomocysteinase 3	49894	0	92762	0
	Q99KE1	Me2	NAD-dependent malic enzyme, mitochondrial	31744	0	51642	0
	Q91WQ3	Yars	Tyrosine--tRNA ligase, cytoplasmic	6067.7	0	32652	0
	O70456	Sfn	14-3-3 protein sigma	13192000	3689200	1041400	0
	Q3UM45	Ppp1r7	Protein phosphatase 1 regulatory subunit 7	5764600	1946900	631230	0
	Q91V12	Acot7	Cytosolic acyl coenzyme A thioester hydrolase	15915000	1551000	396850	0
	P06837	Gap43	Neuromodulin	3422600	1029000	247270	0
	Q8BVE3	Atp6v1h	V-type proton ATPase subunit H	3867500	987510	245760	0
	Q9R1T2	Sae1	SUMO-activating enzyme subunit 1	3103800	707920	1673300	0
	Q9JKV1	Adrm1	Proteasomal ubiquitin receptor ADRM1	1797000	553900	1010600	0
	Q64324	Stxbp2	Syntaxin-binding protein 2	0	262400	14891	0
	P10630	Eif4a2	Eukaryotic initiation factor 4A-II	1654500	234420	263110	0
	Q8K3H0	Appl1	DCC-interacting protein 13-alpha	1850900	154870	577280	0
	Q8K1M6	Dnm1l	Dynamin-1-like protein	1709900	154390	56409	0
	O70318	Epb41l2	Band 4.1-like protein 2	363760	94332	217840	0
	Q9JLJ2	Aldh9a1	4-trimethylaminobutyraldehyde dehydrogenase	1507200	90345	1365000	0
	Q99JP6	Homer3	Homer protein homolog 3	194870	57289	321850	0
	Q3TMH2	Scrn3	Secernin-3	1804300	52793	185550	0
	Q61166	Mapre1	Microtubule-associated protein RP/EB family member 1	453510	41617	263110	0
	D3Z7P3	Gls	Glutaminase kidney isoform, mitochondrial	1820000	30148	23168	0
	Q91XL9	Osbpl1a	Oxysterol-binding protein-related protein 1 (	3050100	24248	425020	0
	Q99J45	Nrbp1	Nuclear receptor-binding protein	216200	13283	15285	0
	P48193	Epb41	Protein 4.1	6075.1	0	88661	0
	Q9CQM9	Glrx3	Glutaredoxin-3	1727200	0	1699800	0
	Q3U2V3	Nudt18	8-oxo-dGDP phosphatase NUDT18	9473	0	9590.3	0
	Q9D8U8	Snx5	Sorting nexin-5	98747	0	468950	0
	Q6PDH0	Phldb1	Pleckstrin homology-like domain family B member 1	23500	0	43883	0
	Q3UE37	Ube2z	Ubiquitin-conjugating enzyme E2 Z	143650	0	90181	0
	Q8CIV8	Tbce	Tubulin-specific chaperone E	71242	0	42862	0
	Q9Z2I8	Suclg2	Succinate--CoA ligase	869230	0	2772500	0
	P70441	Slc9a3r1	Na(+)/H(+) exchange regulatory cofactor NHE-RF1	1812400	0	819940	0
	Q6PDL0	Dync1li2	Cytoplasmic dynein 1 light intermediate chain 2	248630	0	348010	0
	Q8CHU3	Epn2	Epsin-2	18077	0	157940	0
	P61164	Actr1a	Alpha-centractin	908300	0	1323500	0
	A2ADY9	Ddi2	Protein DDI1 homolog 2	810270	0	771570	0
	Q9D3R6	Katnal2	Katanin p60 ATPase-containing subunit A-like 2 (	112450	0	460230	0
	P13439	Umps	Uridine 5'-monophosphate synthase	69613	0	295390	0
	Q3UMM4	Cdk10	Cyclin-dependent kinase 10	441540	0	1414500	0
	Q80TY0	Fnbp1	Formin-binding protein 1	124290	0	175360	0
	Q99JX3	Gorasp2	Golgi reassembly-stacking protein 2	827660	0	259790	0
	Q8QZR5	Gpt	Alanine aminotransferase 1	249770	0	397230	0
	A2ASS6	Ttn	Titin (	32396	0	2344.8	0
	D3YZP9	Ccdc6	Coiled-coil domain-containing protein 6	6669.8	0	12217	0
	Q5SV85	Synrg	Synergin gamma	123640	0	45737	0
	P04370	Mbp	Myelin basic protein (	20415000	57272000	0	0
	P02089	Hbb-b2	Hemoglobin subunit beta-2	60809000	51081000	109640	0
	P17183	Eno2	Gamma-enolase	224760000	48147000	0	0
	Q9JJV2	Pfn2	Profilin-2	17112000	40796000	90556	0
	Q91ZZ3	Sncb	Beta-synuclein	5887700	18688000	0	0
	Q9R0P9	Uchl1	Ubiquitin carboxyl-terminal hydrolase isozyme L1	103590000	15488000	120210	0
	P01831	Thy1	Thy-1 membrane glycoprotein	5897200	13247000	0	0
	P63082	Atp6v0c	V-type proton ATPase 16 kDa proteolipid subunit	16400000	12159000	0	0
	O08599	Stxbp1	Syntaxin-binding protein 1	12743000	11109000	0	0
	O55042	Snca	Alpha-synuclein	3704100	8899200	34917	0
	Q62420	Sh3gl2	Endophilin-A1	16889000	7371200	45357	0
	Q9QYG0	Ndrg2	Protein NDRG2	16720000	6070400	172240	0
	P50518	Atp6v1e1	V-type proton ATPase subunit E 1	10351000	5840900	301350	0
	Q5YD48	A1cf	APOBEC1 complementation factor	387930	0	24885	0
	Q9D8Y0	Efhd2	EF-hand domain-containing protein D2	19638000	5385200	761140	0
	Q6PIC6	Atp1a3	Sodium/potassium-transporting ATPase subunit alpha-3	4132400	5294000	75903	0
	Q9QUH0	Glrx	Glutaredoxin-1 (	1700900	5056400	0	0
	P54227	Stmn1	Stathmin	11773000	4894000	273230	0
	Q61548	Snap91	Clathrin coat assembly protein AP180	3490500	4814300	0	0
	Q61644	Pacsin1	Protein kinase C and casein kinase substrate in neurons protein 1	15699000	4738100	0	0
	Q9Z1G4	Atp6v0a1	V-type proton ATPase 116 kDa subunit a isoform 1	347320	4455400	0	0
	O54983	Crym	Ketimine reductase mu-crystallin	40230000	4245000	18391	0
	P43006	Slc1a2	Excitatory amino acid transporter 2	241980	4215500	0	0
	Q9D2M8	Ube2v2	Ubiquitin-conjugating enzyme E2 variant 2	1033200	4001500	86195	0
	P63011	Rab3a	Ras-related protein Rab-3A	8621000	3649300	0	0
	Q8K183	Pdxk	Pyridoxal kinase	26534000	3476400	820400	0
	O55100	Syngr1	Synaptogyrin-1	762210	3175300	0	0
	O55023	Impa1	Inositol monophosphatase 1	19106000	2968500	141880	0
	Q60870	Reep5	Receptor expression-enhancing protein 5 (	252190	0	69758	0
	P48320	Gad2	Glutamate decarboxylase 2	720800	2794800	0	0
	P60487	Pdxp	Pyridoxal phosphate phosphatase	5212200	2650200	0	0
	Q60829	Ppp1r1b	Protein phosphatase 1 regulatory subunit 1B	3075400	2502200	0	0
	Q60931	Vdac3	Voltage-dependent anion-selective channel protein 3	181380	659380	0	0
	Q9CYT6	Cap2	Adenylyl cyclase-associated protein 2	7579100	2450200	0	0
	P14094	Atp1b1	Sodium/potassium-transporting ATPase subunit beta-1	6958800	2363700	0	0
	P48722	Hspa4l	Heat shock 70 kDa protein 4L	8752300	2260700	345200	0
	P57746	Atp6v1d	V-type proton ATPase subunit D	205000	2082800	11982	0
	Q60994	Adipoq	Adiponectin	0	0	41100	2221600
	Q9DAK9	Phpt1	14 kDa phosphohistidine phosphatase	2164900	2042000	171330	0
	Q99J99	Mpst	3-mercaptopyruvate sulfurtransferase	6956800	1950700	56402	0
	Q9JIS5	Sv2a	Synaptic vesicle glycoprotein 2A	307080	1930100	0	0
	Q5PR73	Diras2	GTP-binding protein Di-Ras2	1173100	1911400	0	0
	P20357	Map2	Microtubule-associated protein 2	20997000	1875200	0	0
	Q61129	Cfi	Complement factor I	0	0	32222	368180
	O88935	Syn1	Synapsin-1	2944800	1720200	0	0
	Q5M8N0	Cnrip1	CB1 cannabinoid receptor-interacting protein 1	8877200	1637200	137730	0
	Q61151	Ppp2r5e	Serine/threonine-protein phosphatase 2A 56 kDa regulatory subunit epsilon isoform	88210	100600	0	0
	P61922	Abat	4-aminobutyrate aminotransferase, mitochondrial	2888500	1636600	0	0
	Q61553	Fscn1	Fasci	6561900	1633100	0	0
	Q7TQF7	Amph	Amphiphysin	3076800	1494100	0	0
	Q99M71	Epdr1	Mammalian ependymin-related protein 1	3715900	1487100	77504	0
	P84091	Ap2m1	AP-2 complex subunit mu	150950	1448900	25257	0
	P46096	Syt1	Synaptotagmin-1	988890	1434300	0	0
	P68181	Prkacb	cAMP-dependent protein kinase catalytic subunit beta	1027000	1409500	114640	0
	Q64332	Syn2	Synapsin-2	3236900	1354700	0	0
	Q8R191	Syngr3	Synaptogyrin-3	958310	1350100	0	0
	Q8CHP8	Pgp	Glycerol-3-phosphate phosphatase	4633700	1241200	103820	0
	Q9WV92	Epb41l3	Band 4.1-like protein 3	4910000	1235000	0	0
	Q91XF0	Pnpo	Pyridoxine-5'-phosphate oxidase	2917300	1234300	213600	0
	Q6PIE5	Atp1a2	Sodium/potassium-transporting ATPase subunit alpha-2	488950	1198800	0	0
	P63158	Hmgb1	High mobility group protein B1	3620600	1169800	84055	0
	P63044	Vamp2	Vesicle-associated membrane protein 2	1872800	1150700	0	0
	Q9CQH7	Btf3l4	Transcription factor BTF3 homolog 4	112710	1123300	24652	0
	P61079	Ube2d3	Ubiquitin-conjugating enzyme E2 D3	261060	1121600	19210	0
	Q8CHC4	Synj1	Synaptojanin-1	1110000	1109700	0	0
	P60202	Plp1	Myelin proteolipid protein	174580	1081000	0	0
	Q9D1K2	Atp6v1f	V-type proton ATPase subunit F	998760	1072900	95219	0
	Q9D051	Pdhb	Pyruvate dehydrogenase E1 component subunit beta, mitochondrial	16135000	1070200	592330	0
	P16330	Cnp	2',3'-cyclic-nucleotide 3'-phosphodiesterase	2057800	995010	286540	0
	P51863	Atp6v0d1	V-type proton ATPase subunit d 1	1532800	991970	0	0
	Q9QZM0	Ubqln2	Ubiquilin-2	7366800	971890	173580	0
	P39053	Dnm1	Dynamin-1 (	6939400	968240	86159	0
	Q99K85	Psat1	Phosphoserine aminotransferase	10394000	917150	29534	0
	Q9D892	Itpa	Inosine triphosphate pyrophosphatase	6679600	916730	93716	0
	P48318	Gad1	Glutamate decarboxylase 1	440760	897660	0	0
	Q8C0M9	Asrgl1	Isoaspartyl peptidase/L-asparaginase	7805800	883150	156950	0
	O88485	Dync1i1	Cytoplasmic dynein 1 intermediate chain 1	6253800	865350	16689	0
	Q4KMM3	Oxr1	Oxidation resistance protein 1	5784600	861120	17081	0
	P46638	Rab11b	Ras-related protein Rab-11B	6116000	858340	715780	0
	Q8VD33	Sgtb	Small glutamine-rich tetratricopeptide repeat-containing protein beta	954010	817680	0	0
	P70202	Lxn	Latexin	8657200	816940	464520	0
	P17426	Ap2a1	AP-2 complex subunit alpha-1	242700	795420	0	0
	P12382	Pfkl	ATP-dependent 6-phosphofructokinase, liver type	17167	784380	0	0
	Q80TB8	Vat1l	Synaptic vesicle membrane protein VAT-1 homolog-like	3692700	754920	1111900	0
	P61264	Stx1b	Syntaxin-1B	5551100	735400	0	0
	Q64520	Guk1	Guanylate kinase	2289500	726390	389050	0
	Q9QZB9	Dctn5	Dynactin subunit 5	250010	717830	127270	0
	Q62048	Pea15	Astrocytic phosphoprotein PEA-15	2451300	0	223710	0
	P31650	Slc6a11	Sodium- and chloride-dependent GABA transporter 3	81115	702860	0	0
	Q80XI4	Pip4k2b	Phosphatidylinositol 5-phosphate 4-kinase type-2 beta	826110	701150	260820	0
	Q62093	Srsf2	Serine/arginine-rich splicing factor 2	184890	0	13888	0
	O35621	Pmm1	Phosphomannomutase 1	2570700	679220	0	0
	Q62165	Dag1	Dystroglycan	41705	0	118450	0
	Q9Z1G3	Atp6v1c1	V-type proton ATPase subunit C 1	1224400	670670	0	0
	P11798	Camk2a	Calcium/calmodulin-dependent protein kinase type II subunit alpha	635120	662200	0	0
	Q80TL4	Phf24	PHD finger protein 24	4271800	661960	0	0
	Q9QUR7	Pin1	Peptidyl-prolyl cis-trans isomerase NIMA-interacting 1	4432900	651350	133140	0
	P61148	Fgf1	Fibroblast growth factor 1	1377300	647290	1129700	0
	Q9QYR6	Map1a	Microtubule-associated protein 1A	4599500	635090	1520.4	0
	P62880	Gnb2	Guanine nucleotide-binding protein G(I)/G(S)/G(T) subunit beta-2	3054400	627230	268910	0
	Q62277	Syp	Synaptophysin	3006300	825800	0	0
	Q9R0K7	Atp2b2	Plasma membrane calcium-transporting ATPase 2	47363	625600	0	0
	Q5EBJ4	Ermn	Ermin	791890	617770	0	0
	P35803	Gpm6b	Neuronal membrane glycoprotein M6-b	75982	610540	0	0
	P30275	Ckmt1	Creatine kinase U-type, mitochondrial	1214700	606000	125540	0
	Q9WTT4	Atp6v1g2	V-type proton ATPase subunit G 2	35527	584560	0	0
	Q8K0T0	Rtn1	Reticulon-1	1681800	580850	0	0
	Q8K021	Scamp1	Secretory carrier-associated membrane protein 1	56501	570080	0	0
	Q9QXL2	Kif21a	Kinesin-like protein KIF21A	1866400	568320	0	0
	Q9WUL7	Arl3	ADP-ribosylation factor-like protein 3	1323300	560100	144350	0
	Q8BGT8	Phyhipl	Phytanoyl-CoA hydroxylase-interacting protein-like	2442900	546100	0	0
	Q9Z0E0	Ncdn	Neurochondrin	625630	539060	0	0
	Q8K2T1	Nmral1	NmrA-like family domain-containing protein 1	1141400	535080	0	0
	Q8CAA7	Pgm2l1	Glucose 1,6-bisphosphate synthase	1100300	533340	0	0
	Q60930	Vdac2	Voltage-dependent anion-selective channel protein 2	422610	532070	49832	0
	O88533	Ddc	Aromatic-L-amino-acid decarboxylase	453710	527970	0	0
	P35585	Ap1m1	AP-1 complex subunit mu-1	522310	486240	49379	0
	P51880	Fabp7	Fatty acid-binding protein, brain	10724000	484810	0	0
	Q63912	Omg	Oligodendrocyte-myelin glycoprotein	87387	210910	0	0
	Q60817	Naca	Nascent polypeptide-associated complex subunit alpha	4756000	483910	1765800	0
	Q8BVQ5	Ppme1	Protein phosphatase methylesterase 1	2815600	482330	273960	0
	Q80TJ1	Cadps	Calcium-dependent secretion activator 1	1294100	472910	0	0
	Q8VDN2	Atp1a1	Sodium/potassium-transporting ATPase subunit alpha-1	334780	470460	137210	0
	Q80XU3	Nucks1	Nuclear ubiquitous casein and cyclin-dependent kinase substrate 1	2089200	470160	0	0
	Q3UHJ0	Aak1	AP2-associated protein kinase 1	1229300	468340	0	0
	P60879	Snap25	Synaptosomal-associated protein 25	2296400	462590	14914	0
	Q01065	Pde1b	Calcium/calmodulin-dependent 3',5'-cyclic nucleotide phosphodiesterase 1B	1119300	456550	0	0
	P47857	Pfkm	ATP-dependent 6-phosphofructokinase, muscle type	362290	451700	0	0
	Q8R317	Ubqln1	Ubiquilin-1	2633800	434260	153720	0
	Q8BK64	Ahsa1	Activator of 90 kDa heat shock protein ATPase homolog 1	2102600	433900	500170	0
	P62743	Ap2s1	AP-2 complex subunit sigma	67483	421940	0	0
	Q9WUA3	Pfkp	ATP-dependent 6-phosphofructokinase, platelet type	483920	420060	176600	0
	Q8CDN6	Txnl1	Thioredoxin-like protein 1	4879900	419280	648930	0
	O09061	Psmb1	Proteasome subunit beta type-1	4841400	416920	2258300	0
	P49442	Inpp1	Inositol polyphosphate 1-phosphatase	1810700	414320	59744	0
	P35276	Rab3d	Ras-related protein Rab-3D	2030200	402960	0	0
	O35405	Pld3	Phospholipase D3	400500	401040	0	0
	Q8VD62	Bles03	UPF0696 protein C11orf68 homolog	138480	400370	0	0
	Q63810	Ppp3r1	Calcineurin subunit B type 1	7542300	398890	198310	0
	P00493	Hprt1	Hypoxanthine-guanine phosphoribosyltransferase	7180500	394590	689360	0
	P61082	Ube2m	NEDD8-conjugating enzyme Ubc12	1814100	381850	159270	0
	Q9R1Q8	Tagln3	Transgelin-3	4224300	377740	0	0
	Q80Z24	Negr1	Neuronal growth regulator 1	742310	373630	0	0
	P10852	Slc3a2	4F2 cell-surface antigen heavy chain	474630	360000	0	0
	Q9QUI0	Rhoa	Transforming protein RhoA	251260	354390	446440	0
	P35505	Fah	Fumarylacetoacetase	1870500	354260	898440	0
	Q60932	Vdac1	Voltage-dependent anion-selective channel protein 1	2932500	354070	171370	0
	Q8VED9	Lgalsl	Galectin-related protein	6272100	353940	148050	0
	Q7TQI3	Otub1	Ubiquitin thioesterase OTUB1	6765900	351820	181870	0
	Q8R464	Cadm4	Cell adhesion molecule 4	1979100	344580	0	0
	Q8BMF3	Me3	NADP-dependent malic enzyme, mitochondrial	1254000	338150	0	0
	Q6DFV7	Ncoa7	Nuclear receptor coactivator 7	23191	0	10748	0
	P08556	Nras	GTPase NRas	440270	337750	64947	0
	P10518	Alad	Delta-aminolevulinic acid dehydratase	3711900	335210	202360	0
	Q8BHD0	Rab39a	Ras-related protein Rab-39A	158200	325690	0	0
	Q6PER3	Mapre3	Microtubule-associated protein RP/EB family member 3	1073400	322470	82922	0
	P12960	Cntn1	Contactin-1	4039300	316150	0	0
	P97300	Nptn	Neuroplastin	383330	313830	0	0
	O08586	Pten Mmac1	Phosphatidylinositol 3,4,5-trisphosphate 3-phosphatase and dual-specificity protein phosphatase	34417	311840	34851	0
	Q3UGR5	Hdhd2	Haloacid dehalogenase-like hydrolase domain-containing protein 2	1892800	297500	55645	0
	Q7TQD2	Tppp	Tubulin polymerization-promoting protein	2721200	295860	346080	0
	P53810	Pitpna	Phosphatidylinositol transfer protein alpha isoform	2166900	293310	104100	0
	Q9Z0P4	Palm	Paralemmin-1	802230	291660	0	0
	Q8K0S0	Phyhip	Phytanoyl-CoA hydroxylase-interacting protein	702910	290820	0	0
	P62746	Rhob	Rho-related GTP-binding protein RhoB	363410	286040	0	0
	Q9Z2I2	Fkbp1b	Peptidyl-prolyl cis-trans isomerase FKBP1B	735490	280640	0	0
	P84086	Cplx2	Complexin-2	3692000	277430	0	0
	P12787	Cox5a	Cytochrome c oxidase subunit 5A, mitochondrial	233440	270060	336570	0
	P48774	Gstm5	Glutathione S-transferase Mu 5	1282200	263420	50177	0
	Q9JKX6	Nudt5	ADP-sugar pyrophosphatase	1509800	263370	227750	0
	Q08642	Padi2	Protein-arginine deiminase type-2	354570	263160	0	0
	Q8K1Z0	Coq9	Ubiquinone biosynthesis protein COQ9, mitochondrial	2471900	261270	31926	0
	P13595	Ncam1	Neural cell adhesion molecule 1	2015200	257980	0	0
	Q9CWZ7	Napg	Gamma-soluble NSF attachment protein	3652000	257650	152740	0
	Q60737	Csnk2a1	Casein kinase II subunit alpha	578790	255430	56146	0
	Q8VIM9	Irgq	Immunity-related GTPase family Q protein	1384500	253010	0	0
	Q8C1A5	Thop1	Thimet oligopeptidase	2865700	251830	78032	0
	P63318	Prkcg	Protein kinase C gamma type	194580	250790	0	0
	Q8BJU0	Sgta	Small glutamine-rich tetratricopeptide repeat-containing protein alpha (	2060600	233650	132980	0
	Q9CR95	Necap1	Adaptin ear-binding coat-associated protein 1	4756500	232660	0	0
	Q9CQI6	Cotl1	Coactosin-like protein	10564000	230230	1070100	0
	Q64514	Tpp2	Tripeptidyl-peptidase 2	568400	228140	86922	0
	Q3UHL1	Camkv	CaM kinase-like vesicle-associated protein	779650	228090	0	0
	P40336	Vps26a	Vacuolar protein sorting-associated protein 26A	698230	226250	708840	0
	P58389	Ptpa	Serine/threonine-protein phosphatase 2A activator	187200	225560	100700	0
	Q3TC72	Fahd2	Fumarylacetoacetate hydrolase domain-containing protein 2A	1431700	223070	101120	0
	Q9CR16	Ppid	Peptidyl-prolyl cis-trans isomerase D	2650500	222130	1010300	0
	P63046	Sult4a1	Sulfotransferase 4A1	727500	221540	0	0
	Q8BHZ0	Fam49a	Protein FAM49A	443340	218600	216690	0
	P32037	Slc2a3	Solute carrier family 2, facilitated glucose transporter member 3	0	211320	54346	0
	P31324	Prkar2b	cAMP-dependent protein kinase type II-beta regulatory subunit	5101900	209490	113240	0
	P56960	Exosc10	Exosome component 10	1747.9	205720	30682	0
	Q61481	Pde1a	Calcium/calmodulin-dependent 3',5'-cyclic nucleotide phosphodiesterase 1A	555920	205670	0	0
	Q6P1B1	Xpnpep1	Xaa-Pro aminopeptidase 1	873200	205460	145990	0
	Q6TDP3	Klhl17	Kelch-like protein 17	251220	0	424220	0
	Q9CQM5	Txndc17	Thioredoxin domain-containing protein 17	879770	204550	263980	0
	P23591	Tsta3	GDP-L-fucose synthase	266260	203880	177170	0
	Q62425	Ndufa4	Cytochrome c oxidase subunit NDUFA4	0	203440	229700	0
	P62869	Elob	Elongin-B 2)	2561500	201560	655630	0
	Q91VH6	Memo1	Protein MEMO1	324880	198300	0	0
	O08599	Stxbp1	Syntaxin-binding protein 1	673610	198050	0	0
	Q60960	Kpna1	Importin subunit alpha-5	24905	196960	0	0
	O35643	Ap1b1	AP-1 complex subunit beta-1	426190	196050	2280.7	0
	P24288	Bcat1	Branched-chain-amino-acid aminotransferase, cytosolic	4074600	191800	0	0
	Q9CPX6	Atg3	Ubiquitin-like-conjugating enzyme ATG3	80581	191680	141950	0
	Q9WV92	Epb41l3	Band 4.1-like protein 3	291050	189400	0	0
	Q8BFS6	Cpped1	Serine/threonine-protein phosphatase CPPED1	847140	189300	32381	0
	Q6ZWV7	Rpl35	60S ribosomal protein L35	118990	0	49970	0
	P62631	Eef1a2	Elongation factor 1-alpha 2	495390	188110	0	0
	Q7TSJ2	Map6	Microtubule-associated protein 6	704320	183420	0	0
	Q9Z0S1	Bpnt1	3'(2'),5'-bisphosphate nucleotidase 1	2487800	177860	246300	0
	Q9DCZ1	Gmpr	GMP reductase 1	485260	177000	0	0
	P62254	Ube2g1	Ubiquitin-conjugating enzyme E2 G1	211620	175470	71937	0
	Q9JHW2	Nit2	Omega-amidase NIT2	2785500	171650	125000	0
	Q76LS9	Mindy1	Ubiquitin carboxyl-terminal hydrolase MINDY-1	299620	0	77134	0
	Q91X96	Rabif	Guanine nucleotide exchange factor MSS4	670000	170000	260000	0
	O08915	Aip	AH receptor-interacting protein	208610	167880	235500	0
	P32848	Pvalb	Parvalbumin alpha	3386300	167550	0	0
	Q9QZ88	Vps29	Vacuolar protein sorting-associated protein 29	2811300	166220	593970	0
	Q9QXS6	Dbn1	Drebrin	4245900	163590	0	0
	Q3ULJ0	Gpd1l	Glycerol-3-phosphate dehydrogenase 1-like protein	3788300	162800	45284	0
	Q810U4	Nrcam	Neuronal cell adhesion molecule	1309900	162380	0	0
	Q8CCT4	Tceal5	Transcription elongation factor A protein-like 5	2781900	159840	0	0
	Q91WK5	Gcsh	Glycine cleavage system H protein, mitochondrial	140400	159500	94522	0
	Q9Z2H5	Epb41l1	Band 4.1-like protein 1	1854600	155460	0	0
	P32883	Kras	GTPase KRas	39166	154230	17148	0
	P10605	Ctsb	Cathepsin B	2574700	152960	98320	0
	Q91YR1	Twf1	Twinfilin-1	726260	152710	93009	0
	Q9R061	Nubp2	Cytosolic Fe-S cluster assembly factor NUBP2	1544300	148670	288010	0
	E9PUL5	Prrt2	Proline-rich transmembrane protein 2	195150	148290	0	0
	Q80TM9	Nisch	Nischarin	279480	147580	0	0
	Q4VAA2	Cdv3	Protein CDV3	143250	147440	0	0
	P36916	Gnl1	Guanine nucleotide-binding protein-like 1	165360	145180	0	0
	A6H630	Armt1	Protein-glutamate O-methyltransferase	117660	144930	0	0
	Q8BHE3	Atcay	Caytaxin	906590	144520	0	0
	Q9CR26	Vta1	Vacuolar protein sorting-associated protein VTA1 homolog	385260	141730	250650	0
	Q9Z1B3	Plcb1	1-phosphatidylinositol 4,5-bisphosphate phosphodiesterase beta-1	1423000	141690	0	0
	Q8CGY8	Ogt	UDP-N-acetylglucosamine--peptide N-acetylglucosaminyltransferase 110 kDa subunit	1087600	140480	91550	0
	Q9WTL7	Lypla2	Acyl-protein thioesterase 2	2824900	138320	102180	0
	P09528	Fth1	Ferritin heavy chain	637570	138160	1171900	0
	P14115	Rpl27a	60S ribosomal protein L27a	0	137780	103160	0
	O55125	Nipsnap1	Protein NipSnap homolog 1	46925	135330	0	0
	P61087	Ube2k	Ubiquitin-conjugating enzyme E2 K	802250	134880	97426	0
	Q9Z1Z2	Strap	Serine-threonine kinase receptor-associated protein	2678100	134180	581840	0
	Q61879	Myh10	Myosin-10	200660	133390	18295	0
	Q9CYW4	Hdhd3	Haloacid dehalogenase-like hydrolase domain-containing protein 3	556170	133290	0	0
	Q9EQQ9	Mgea5	Protein O-GlcNAcase	371620	129520	0	0
	Q8JZK9	Hmgcs1	Hydroxymethylglutaryl-CoA synthase, cytoplasmic	375330	128100	0	0
	Q8BWR2	Pithd1	PITH domain-containing protein 1	785470	127420	415500	0
	Q9CZ13	Uqcrc1	Cytochrome b-c1 complex subunit 1, mitochondrial	572030	125740	972410	0
	Q8BLK3	Lsamp	Limbic system-associated membrane protein	3838300	124760	0	0
	O35551	Rabep1	Rab GTPase-binding effector protein 1	430270	124420	0	0
	P55821	Stmn2	Stathmin-2	5119400	123720	234890	0
	Q80X50	Ubap2l	Ubiquitin-associated protein 2-like	61038	0	21643	0
	P48668	KRT6C	Keratin, type II cytoskeletal 6C	132500	0	90047	0
	P02754	LGB	Beta-lactoglobulin	6774600	0	1367400	0
	P02768	ALB	Serum albumin	53778	0	1952300	0
	P04259	KRT6B	Keratin, type II cytoskeletal 6B	242380	0	219060	0
	P08779	KRT16	Keratin, type I cytoskeletal 16	786540	0	220310	0
	P13647	KRT5	Keratin, type II cytoskeletal 5	2188700	0	991940	0
	Q04695	KRT17	Keratin, type I cytoskeletal 17	278890	0	100190	0
	Q86YZ3	HRNR	Hornerin	25814	0	5438.3	0
	Q8BTZ7	Gmppb	Mannose-1-phosphate guanyltransferase beta	146420	122330	405930	0
	Q91Z53	Grhpr	Glyoxylate reductase/hydroxypyruvate reductase	2601600	120310	63291	0
	Q9D394	Rufy3	Protein RUFY3	4457900	120290	25785	0
	Q80TZ3	Dnajc6	Putative tyrosine-protein phosphatase auxilin	279080	117010	0	0
	Q9JME5	Ap3b2	AP-3 complex subunit beta-2	241490	115030	0	0
	Q9QY76	Vapb	Vesicle-associated membrane protein-associated protein B	48163	114370	0	0
	Q9CQD1	Rab5a	Ras-related protein Rab-5A	235460	113820	213620	0
	Q8BFY6	Pef1	Peflin	292390	0	114770	0
	Q9JLM8	Dclk1	Serine/threonine-protein kinase DCLK1	174010	111830	0	0
	P56213	Gfer	FAD-linked sulfhydryl oxidase ALR	69280	111270	94388	0
	O55091	Impact	Protein IMPACT	1911500	110200	405480	0
	P84096	Rhog	Rho-related GTP-binding protein RhoG	0	109530	50875	0
	Q8BNW9	Kbtbd11	Kelch repeat and BTB domain-containing protein 11	491110	106840	31108	0
	Q9D8X1	Cutc	Copper homeostasis protein cutC homolog	168490	106560	130010	0
	Q9Z1S5	Sept3 Sep3	Neuronal-specific septin-3	26991000	106030	0	0
	Q9CZ42	Naxd	ATP-dependent (S)-NAD(P)H-hydrate dehydratase	335460	105770	62637	0
	P28663	Napb	Beta-soluble NSF attachment protein	758160	105460	0	0
	Q9CX34	Sugt1	Protein SGT1 homolog	2380500	105410	325230	0
	Q8CAK3	Ryden	Repressor of yield of DENV protein homolog	78687	105310	0	0
	Q8VHL1	Setd7	Histone-lysine N-methyltransferase SETD7	846260	105110	0	0
	Q8BVU5	Nudt9	ADP-ribose pyrophosphatase, mitochondrial	268280	103350	0	0
	Q9EPN1	Nbea	Neurobeachin	22537	103070	0	0
	Q6WVG3	Kctd12	BTB/POZ domain-containing protein KCTD12	358360	102380	122500	0
	Q9JIW9	Ralb	Ras-related protein Ral-B	175210	101200	334870	0
	Q3TXS7	Psmd1	26S proteasome non-ATPase regulatory subunit 1	1053300	96531	981830	0
	Q9DB20	Atp5o	ATP synthase subunit O, mitochondrial	0	95462	103540	0
	Q99JI4	Psmd6	26S proteasome non-ATPase regulatory subunit 6	0	93332	187630	0
	P17427	Ap2a2	AP-2 complex subunit alpha-2	192950	92187	9091.8	0
	Q9D6Y9	Gbe1	1,4-alpha-glucan-branching enzyme	401310	90998	269950	0
	Q9Z1F9	Uba2	SUMO-activating enzyme subunit 2	246900	89862	488430	0
	O54984	Asna1	ATPase Asna1	436640	87459	108040	0
	P63040	Cplx1	Complexin-1	1899400	87249	0	0
	Q8BGB7	Enoph1	Enolase-phosphatase E1	442760	86365	0	0
	P62082	Rps7	40S ribosomal protein S7	0	84076	147540	0
	P62823	Rab3c	Ras-related protein Rab-3C	473640	82717	0	0
	Q5SSL4	Abr	Active breakpoint cluster region-related protein	359470	82648	204930	0
	Q9JKK7	Tmod2	Tropomodulin-2	450100	82468	154210	0
	Q9DC61	Pmpca	Mitochondrial-processing peptidase subunit alpha (	269890	79229	87497	0
	Q8C4B4	Unc119b	Protein unc-119 homolog B	40322	76870	35660	0
	Q8R001	Mapre2	Microtubule-associated protein RP/EB family member 2	530160	76449	30225	0
	Q99P72	Rtn4	Reticulon-4	1762800	75367	12345	0
	Q9Z0F7	Sncg	Gamma-synuclein	87212	75190	0	0
	Q6ZPJ3	Ube2o	(E3-independent) E2 ubiquitin-conjugating enzyme UBE2O	231930	74683	0	0
	P12658	Calb1	Calbindin	21990000	74675	0	0
	Q91V14	Slc12a5	Solute carrier family 12 member 5	106370	74177	0	0
	Q8BI08	Mal2	Protein MAL2	0	567380	1325700	0
	P28667	Marcksl1	MARCKS-related protein	222250	72554	144340	0
	P62852	Rps25	40S ribosomal protein S25	0	72206	107190	0
	Q8K212	Pacs1	Phosphofurin acidic cluster sorting protein 1	19312	71375	0	0
	B2RSH2	Gnai1	Guanine nucleotide-binding protein G(i) subunit alpha-1	92412	70660	0	0
	Q8R5C5	Actr1b	Beta-centractin	2548100	69134	2936500	0
	P47199	Cryz	Quinone oxidoreductase	473510	68001	79393	0
	Q9CY64	Blvra	Biliverdin reductase A	2560300	67595	13400	0
	Q58A65	Spag9	C-Jun-amino-terminal kinase-interacting protein 4	75813	67268	111610	0
	Q99JW2	Acy1	Aminoacylase-1	1028400	67261	34676	0
	Q64674	Srm	Spermidine synthase	3122900	65999	28345	0
	Q811I0	Atpaf1	ATP synthase mitochondrial F1 complex assembly factor 1	119390	64547	0	0
	Q9DBB8	Dhdh	Trans-1,2-dihydrobenzene-1,2-diol dehydrogenase	472890	63892	91603	0
	Q8BR90		UPF0600 protein C5orf51 homolog	11537	63866	0	0
	Q80TJ1	Cadps	Calcium-dependent secretion activator 1	52454	63033	0	0
	Q8BLJ3	Plcxd3	PI-PLC X domain-containing protein 3	51929	68206	0	0
	Q91XV3	Basp1	Brain acid soluble protein 1	4616800	62827	0	0
	Q8QZS1	Hibch	3-hydroxyisobutyryl-CoA hydrolase, mitochondrial	433750	62795	196210	0
	Q8BFQ8	Gatd1	Glutamine amidotransferase-like class 1 domain-containing protein 1	979980	62606	287240	0
	Q9JHK4	Rabggta	Geranylgeranyl transferase type-2 subunit alpha	79104	61584	0	0
	Q9WV69	Dmtn	Dematin	173530	60745	0	0
	Q8BG32	Psmd11	26S proteasome non-ATPase regulatory subunit 11	203250	60313	1109600	0
	Q9CYR0	Ssbp1	Single-stranded DNA-binding protein, mitochondrial	155140	59169	66344	0
	Q8VDQ8	Sirt2	NAD-dependent protein deacetylase sirtuin-2	828570	58060	97337	0
	Q9D0A3	Arpin	Arpin	1036100	57681	144780	0
	Q9CWF2	Tubb2b	Tubulin beta-2B chain	1630500	56647	0	0
	P08032	Spta1	Spectrin alpha chain, erythrocytic 1	173440	53361	3618.4	0
	P16054	Prkce	Protein kinase C epsilon type	98932	52666	0	0
	P63166	Sumo1	Small ubiquitin-related modifier 1	90575	52576	28220	0
	Q3USB7	Plcl1	Inactive phospholipase C-like protein 1	190380	51391	15088	0
	P23506	Pcmt1	Protein-L-isoaspartate(D-aspartate) O-methyltransferase	3769400	51171	396570	0
	Q8VEH5	Epm2aip1	EPM2A-interacting protein 1	48464	50698	0	0
	P31938	Map2k1	Dual specificity mitogen-activated protein kinase kinase 1	4104600	49001	254590	0
	Q99KR3	Lactb2	Endoribonuclease LACTB2	339790	48663	17380	0
	P97351	Rps3a	40S ribosomal protein S3a	0	48628	213970	0
	Q8BNU0	Armc6	Armadillo repeat-containing protein 6	403410	48347	0	0
	Q9Z0P5	Twf2	Twinfilin-2	93665	48324	11308	0
	Q8VD37	Sgip1	SH3-containing GRB2-like protein 3-interacting protein 1	61089	47611	0	0
	P70335	Rock1	Rho-associated protein kinase 1	54664	46206	363630	0
	Q9ES97	Rtn3	Reticulon-3	823840	43535	0	0
	Q8BTY1	Kyat1	Kynurenine--oxoglutarate transaminase 1	193550	42961	117760	0
	Q9CQN1	Trap1	Heat shock protein 75 kDa, mitochondrial	363060	42917	53215	0
	O55143	Atp2a2	Sarcoplasmic/endoplasmic reticulum calcium ATPase 2	18087	42681	144220	0
	P33173	Kif1a	Kinesin-like protein KIF1A	134840	42670	9139.4	0
	Q9R1T4	Sept6	Septin-6	669010	41493	261130	0
	Q9DB05	Napa	Alpha-soluble NSF attachment protein	447330	39527	12193	0
	Q7TMB8	Cyfip1	Cytoplasmic FMR1-interacting protein 1 (	0	39266	47322	0
	P28738	Kif5c	Kinesin heavy chain isoform 5C	835930	38236	0	0
	Q8BPN8	Dmxl2	DmX-like protein 2	20856	37871	0	0
	Q9WUD1	Stub1	STIP1 homology and U box-containing protein 1	302900	37623	23254	0
	Q8C8R3	Ank2	Ankyrin-2	237430	36433	0	0
	Q3UDE2	Ttll12	Tubulin--tyrosine ligase-like protein 12	50411	36193	8804	0
	Q8BW96	Camk1d	Calcium/calmodulin-dependent protein kinase type 1D	459920	35853	155110	0
	Q3B7Z2	Osbp	Oxysterol-binding protein 1	33824	34257	12434	0
	P08551	Nefl	Neurofilament light polypeptide	26595	34110	0	0
	Q8BUV3	Gphn	Gephyrin	937180	33209	251930	0
	Q9D2V7	Coro7	Coronin-7	370860	32804	44879	0
	Q7TMY8	Huwe1	E3 ubiquitin-protein ligase HUWE1	6719.5	32281	3692.5	0
	Q8BMI3	Gga3	ADP-ribosylation factor-binding protein GGA3	217930	32023	0	0
	Q8VI75	Ipo4	Importin-4	111090	31731	10496	0
	Q8CGY8	Ogt	UDP-N-acetylglucosamine--peptide N-acetylglucosaminyltransferase 110 kDa subunit	26177	30281	15395	0
	Q810U3	Nfasc	Neurofascin	255600	29999	0	0
	Q9DBE0	Csad	Cysteine sulfinic acid decarboxylase	0	29840	89886	0
	Q99MR6	Srrt	Serrate RNA effector molecule homolog	82370	29495	175140	0
	Q9JHI5	Ivd	Isovaleryl-CoA dehydrogenase, mitochondrial	251440	29249	2571500	0
	P51881	Slc25a5	ADP/ATP translocase 2	8543.9	28843	80183	0
	Q6NVF0	Ocrl	Inositol polyphosphate 5-phosphatase OCRL-1	11214	28827	0	0
	Q91XM9	Dlg2	Disks large homolog 2	1406700	28134	0	0
	Q9D964	Gatm	Glycine amidinotransferase, mitochondrial	22441	27400	0	0
	Q80U28	Madd	MAP kinase-activating death domain protein	82122	26329	0	0
	Q9D7G0	Prps1	Ribose-phosphate pyrophosphokinase 1	265470	24347	21987	0
	Q8K274	Fn3krp	Ketosamine-3-kinase	628920	24299	602870	0
	P08414	Camk4	Calcium/calmodulin-dependent protein kinase type IV	110140	23588	0	0
	Q8C0L6	Paox	Peroxisomal N(1)-acetyl-spermine/spermidine oxidase	0	108480	23061	0
	Q9JKR6	Hyou1	Hypoxia up-regulated protein 1	462510	23116	323350	0
	Q924M7	Mpi	Mannose-6-phosphate isomerase	681840	20668	49062	0
	P70677	Casp3	Caspase-3	179700	20268	104280	0
	P42232	Stat5b	Signal transducer and activator of transcription 5B	0	20167	139720	0
	Q6A4J8	Usp7	Ubiquitin carboxyl-terminal hydrolase 7)	63246	19187	11650	0
	Q62059	Vcan	Versican core protein	282960	18262	0	0
	Q8R164	Bphl	Valacyclovir hydrolase	408960	17243	301830	0
	P21279	Gnaq	Guanine nucleotide-binding protein G(q) subunit alpha	962480	17117	555440	0
	Q8BGQ7	Aars	Alanine--tRNA ligase, cytoplasmic	977120	16681	280400	0
	P0C605	Prkg1	cGMP-dependent protein kinase 1	0	15308	126840	0
	O54774	Ap3d1	AP-3 complex subunit delta-1	40659	15255	0	0
	P28028	Braf	Serine/threonine-protein kinase B-raf	22381	14088	0	0
	O35927	Ctnnd2	Catenin delta-2	6388.8	13715	0	0
	Q9D5V5	Cul5	Cullin-5	44403	13178	8012.7	0
	Q8CGF6	Wdr47	WD repeat-containing protein 47	291530	12666	7765.7	0
	P51150	Rab7a	Ras-related protein Rab-7a	1721200	11980	968900	0
	Q8K411	Pitrm1	Presequence protease, mitochondrial	18767	11968	64673	0
	Q6PAV2	Herc4	Probable E3 ubiquitin-protein ligase HERC4	0	11946	31824	0
	Q99LB7	Sardh	Sarcosine dehydrogenase, mitochondrial	62650	11420	0	0
	P22892	Ap1g1	AP-1 complex subunit gamma-1	15907	10124	0	0
	O35954	Pitpnm1	Membrane-associated phosphatidylinositol transfer protein 1	9744.2	9206.6	0	0
	Q9JHR7	Ide	Insulin-degrading enzyme	32894	7437.4	246630	0
	Q5SUR0	Pfas	Phosphoribosylformylglycinamidine synthase	341180	7153.6	35618	0
	Q8R3C0	Mcmbp	Mini-chromosome maintenance complex-binding protein	0	7060.7	36296	0
	P01029	C4b C4	Complement C4-B	0	6958.4	28998	0
	Q9D8W5	Psmd12	26S proteasome non-ATPase regulatory subunit 12 (	0	6912.7	476590	0
	P15508	Sptb	Spectrin beta chain, erythrocytic	25842	6670.1	2776	0
	Q9ES52	Inpp5d	Phosphatidylinositol 3,4,5-trisphosphate 5-phosphatase 1	0	5937.5	525400	0
	P28867	Prkcd	Protein kinase C delta type	19065	5401.7	0	0
	Q62077	Plcg1	1-phosphatidylinositol 4,5-bisphosphate phosphodiesterase gamma-1	55371	5374.7	22903	0
	Q6P5F9	Xpo1	Exportin-1	1807.4	4771.2	44715	0
	Q02357	Ank1	Ankyrin-1	21780	4376.2	0	0
	Q8CF66	Lamtor4	Ragulator complex protein LAMTOR4	378940	0	178540	0
	Q8C522	Endod1	Endonuclease domain-containing 1 protein	78085	3639.3	0	0
	Q61599	Arhgdib	Rho GDP-dissociation inhibitor 2	1101300	0	2801300	0
	Q9D0B6	Pbdc1	Protein PBDC1	373150	0	861400	0
	P35278	Rab5c	Ras-related protein Rab-5C	208860	0	682920	0
	Q9D6J6	Ndufv2	NADH dehydrogenase [ubiquinone] flavoprotein 2, mitochondrial	216070	0	537430	0
	Q9CPU0	Glo1	Lactoylglutathione lyase	18235000	0	1531800	0
	Q9Z2M7	Pmm2	Phosphomannomutase 2	526300	0	718270	0
	O88952	Lin7c	Protein lin-7 homolog C	302220	0	1714500	0
	P61022	Chp1	Calcineurin B homologous protein 1	1005000	0	356300	0
	Q9WVL0	Gstz1	Maleylacetoacetate isomerase	80773	0	748210	0
	Q8CGR7	Upp2	Uridine phosphorylase 2	36241	0	5042.3	0
	Q9JI75	Nqo2	Ribosyldihydronicotinamide dehydrogenase [quinone]	29480	0	467750	0
	P61021	Rab5b	Ras-related protein Rab-5B	183950	0	451410	0
	Q9WTP6	Ak2	Adenylate kinase 2, mitochondrial	24784	0	342560	0
	O88696	Clpp	ATP-dependent Clp protease proteolytic subunit, mitochondrial	195250	0	135400	0
	O88587	Comt	Catechol O-methyltransferase	166150	0	311630	0
	P62071	Rras2	Ras-related protein R-Ras2	18906	0	304770	0
	P70195	Psmb7	Proteasome subunit beta type-7	6903900	0	1106200	0
	Q9DCT2	Ndufs3	NADH dehydrogenase [ubiquinone] iron-sulfur protein 3, mitochondrial	81066	0	94889	0
	Q63829	Commd3	COMM domain-containing protein 3	117320	0	237970	0
	Q9D1G1	Rab1b	Ras-related protein Rab-1B	437790	0	369330	0
	Q64010	Crk	Adapter molecule crk	2484300	0	195040	0
	Q9Z2Y8	Plpbp	Pyridoxal phosphate homeostasis protein	337480	0	206970	0
	Q9DB29	Iah1	Isoamyl acetate-hydrolyzing esterase 1 homolog	30454	0	803710	0
	Q9QXS1	Plec	Plectin (PCN) (PLTN) (Plectin-1) (Plectin-6)	776.2	0	26966	0
	Q9JKB1	Uchl3	Ubiquitin carboxyl-terminal hydrolase isozyme L3	5683800	0	243340	0
	O55135	Eif6	Eukaryotic translation initiation factor 6	886670	0	248550	0
	Q62422	Ostf1	Osteoclast-stimulating factor 1	433620	0	773270	0
	Q9D0R8	Lsm12	Protein LSM12 homolog	335030	0	443980	0
	O55022	Pgrmc1	Membrane-associated progesterone receptor component 1	260960	0	253330	0
	P61759	Vbp1	Prefoldin subunit 3	61482	0	55675	0
	P47968	Rpia	Ribose-5-phosphate isomerase	25916	0	136940	0
	Q9CR68	Uqcrfs1	Cytochrome b-c1 complex subunit Rieske, mitochondrial	55540	0	44507	0
	Q8K157	Galm	Aldose 1-epimerase	54237	0	78381	0
	Q8K1L5	Ppp1r11	E3 ubiquitin-protein ligase PPP1R11	897090	0	364810	0
	P60766	Cdc42	Cell division control protein 42 homolog	117530	0	334430	0
	Q6PHN9	Rab35	Ras-related protein Rab-35	187870	0	144630	0
	P47941	Crkl	Crk-like protein	847620	0	1066200	0
	P35279	Rab6a	Ras-related protein Rab-6A	707730	0	80069	0
	P63321	Rala	Ras-related protein Ral-A	356170	0	216840	0
	Q9CQW1	Ykt6	Synaptobrevin homolog YKT6	473730	0	105380	0
	P58044	Idi1	Isopentenyl-diphosphate Delta-isomerase 1	402090	0	106770	0
	P97823	Lypla1	Acyl-protein thioesterase 1	228580	0	348530	0
	Q9DCS2	Mettl26	Methyltransferase-like 26	224210	0	59409	0
	Q9QZ23	Nfu1	NFU1 iron-sulfur cluster scaffold homolog, mitochondrial	223390	0	100710	0
	Q9ERE7	Mesd	LRP chaperone MESD	76501	0	158480	0
	Q8BGR6	Arl15	ADP-ribosylation factor-like protein 15	41360	0	126380	0
	Q9QVP9	Ptk2b	Protein-tyrosine kinase 2-beta	7105.5	0	15511	0
	Q3UHX2	Pdap1	28 kDa heat- and acid-stable phosphoprotein	418090	0	205940	0
	Q8VBV7	Cops8	COP9 signalosome complex subunit 8	202920	0	276670	0
	Q70IV5	Synm	Synemin	16411	0	13231	0
	P97765	Wbp2	WW domain-binding protein 2	2698500	0	1029600	0
	Q9WUB4	Dctn6	Dynactin subunit 6	481720	0	88044	0
	O08788	Dctn1	Dynactin subunit 1	734720	0	332780	0
	P97371	Psme1	Proteasome activator complex subunit 1	139890	0	1107000	0
	Q8R2H9	Phospho1	Phosphoethanolamine/phosphocholine phosphatase	11921	0	10866	0
	P57759	Erp29	Endoplasmic reticulum resident protein 29	663540	0	172970	0
	P31230	Aimp1	Aminoacyl tRNA synthase complex-interacting multifunctional protein 1	52111	0	437890	0
	Q9WU84	Ccs	Copper chaperone for superoxide dismutase	146090	0	195400	0
	P70398	Usp9x	Probable ubiquitin carboxyl-terminal hydrolase FAF-X	8016.6	0	23585	0
	P19536	Cox5b	Cytochrome c oxidase subunit 5B, mitochondrial	123550	0	464540	0
	Q8BHG2		UPF0587 protein C1orf123 homolog	1047700	0	83566	0
	P51163	Uros	Uroporphyrinogen-III synthase	298370	0	63517	0
	Q61205	Pafah1b3	Platelet-activating factor acetylhydrolase IB subunit gamma	251640	0	24431	0
	O35857	Timm44	Mitochondrial import inner membrane translocase subunit TIM44	238960	0	6739.8	0
	Q921H9	Coa7	Cytochrome c oxidase assembly factor 7	224420	0	17700	0
	Q8CH72	Trim32	E3 ubiquitin-protein ligase TRIM32	155520	0	41395	0
	Q8R1G2	Cmbl	Carboxymethylenebutenolidase homolog	61855	0	45897	0
	Q8BXC6	Commd2	COMM domain-containing protein 2	42790	0	26720	0
	Q3TCN2	Plbd2	Putative phospholipase B-like 2	42129	0	16813	0
	Q99P58	Rab27b	Ras-related protein Rab-27B	26355	0	22050	0
	P30999	Ctnnd1	Catenin delta-1	21534	0	2619.1	0
	P62748	Hpcal1	Hippocalcin-like protein 1	1084800	0	196830	0
	P68037	Ube2l3	Ubiquitin-conjugating enzyme E2 L3	487210	0	907580	0
	P19783	Cox4i1	Cytochrome c oxidase subunit 4 isoform 1, mitochondrial	740690	0	518550	0
	Q9D1D4	Tmed10	Transmembrane emp24 domain-containing protein 10	34154	0	210060	0
	P62761	Vsnl1	Visinin-like protein 1	3043000	0	209920	0
	O55013	Trappc3	Trafficking protein particle complex subunit 3	24193	0	835840	0
	Q9D868	Ppih	Peptidyl-prolyl cis-trans isomerase H	254650	0	268060	0
	Q9CQ45	Nenf	Neudesin	222500	0	170280	0
	Q9CQR4	Acot13	Acyl-coenzyme A thioesterase 13	2359500	0	455910	0
	Q8BMJ3	Eif1ax	Eukaryotic translation initiation factor 1A, X-chromosomal	740870	0	116190	0
	Q78J03	Msrb2	Methionine-R-sulfoxide reductase B2, mitochondrial	56723	0	196930	0
	Q9WV55	Vapa	Vesicle-associated membrane protein-associated protein A	55167	0	84402	0
	Q9D967	Mdp1	Magnesium-dependent phosphatase 1	894660	0	266090	0
	Q8VEH6	Cbwd1	COBW domain-containing protein 1	36152	0	56385	0
	Q91X97	Ncald	Neurocalcin-delta	164340	0	136300	0
	O70493	Snx12	Sorting nexin-12	232230	0	179900	0
	Q9D7P6	Iscu	Iron-sulfur cluster assembly enzyme ISCU, mitochondrial	579220	0	251910	0
	Q9D0J4	Arl2	ADP-ribosylation factor-like protein 2	335850	0	179190	0
	P62900	Rpl31	60S ribosomal protein L31	319960	0	523280	0
	P61924	Copz1	Coatomer subunit zeta-1	252570	0	441910	0
	P35293	Rab18	Ras-related protein Rab-18	219950	0	86839	0
	Q9CQE5	Rgs10	Regulator of G-protein signaling 10	106390	0	125270	0
	Q9D0P8	Ift27 l	Intraflagellar transport protein 27 homolog	38797	0	97199	0
	Q8VEH3	Arl8a	ADP-ribosylation factor-like protein 8A	24137	0	89398	0
	Q91VB4	Hps3	Hermansky-Pudlak syndrome 3 protein homolog	23183	0	59963	0
	Q505B7	Zbtb8os	Protein archease	693400	0	301090	0
	Q9WV85	Nme3	Nucleoside diphosphate kinase 3	187990	0	351380	0
	Q91VF2	Hnmt	Histamine N-methyltransferase	37776	0	16714	0
	Q9CQ48	Nudcd2	NudC domain-containing protein 2	506760	0	530860	0
	Q9D898	Arpc5l	Actin-related protein 2/3 complex subunit 5-like protein	183550	0	78537	0
	P62878	Rbx1	E3 ubiquitin-protein ligase RBX1	176910	0	208420	0
	Q9CQW2	Arl8b	ADP-ribosylation factor-like protein 8B	83979	0	116240	0
	Q9CQ92	Fis1	Mitochondrial fission 1 protein	44907	0	340350	0
	Q9JI46	Nudt3	Diphosphoinositol polyphosphate phosphohydrolase 1	2170500	0	76133	0
	O55057	Pde6d	Retinal rod rhodopsin-sensitive cGMP 3',5'-cyclic phosphodiesterase subunit delta	1260800	0	187000	0
	P70699	Gaa	Lysosomal alpha-glucosidase	672450	0	21345	0
	Q62426	Cstb	Cystatin-B	578690	0	445990	0
	P56395	Cyb5a	Cytochrome b5	495610	0	576580	0
	Q923G2	Polr2h	DNA-directed RNA polymerases I, II, and III subunit RPABC3	454230	0	47268	0
	Q9DB60	Fam213b	Prostamide/prostaglandin F synthase	150910	0	23500	0
	Q9CQU0	Txndc12	Thioredoxin domain-containing protein 12	111310	0	68872	0
	Q91WE2	Fam192a	Protein FAM192A	50783	0	56924	0
	Q8K4M5	Commd1	COMM domain-containing protein 1	68067	0	108730	0
	O08579	Emd	Emerin	60416	0	11381	0
	Q9R0Q3	Tmed2	Transmembrane emp24 domain-containing protein 2	57880	0	76702	0
	Q91WK2	Eif3h	Eukaryotic translation initiation factor 3 subunit H	66022	0	162520	364710
	Q9D820	Prorsd1	Prolyl-tRNA synthetase associated domain-containing protein 1	49994	0	254410	0
	P56389	Cda	Cytidine deaminase	81157	0	84465	0
	Q8VCN9	Tbcc	Tubulin-specific chaperone C	45286	0	125480	0
	P21460	Cst3	Cystatin-C (Cystatin-3)	188790	0	222280	0
	O88851	Rbbp9	Putative hydrolase RBBP9	1057700	0	121540	0
	P62311	Lsm3	U6 snRNA-associated Sm-like protein LSm3	719340	0	313310	0
	Q9D7X8	Ggct	Gamma-glutamylcyclotransferase	672140	0	26156	0
	P62751	Rpl23a	60S ribosomal protein L23a	621470	0	485210	0
	Q9DAI2	Ift22	Intraflagellar transport protein 22 homolog	538090	0	54031	0
	P04938	Mup11	Major urinary protein 11	488900	0	60616	0
	Q99JT9	Adi1	1,2-dihydroxy-3-keto-5-methylthiopentene dioxygenase	395720	0	28335	0
	Q9R1Z7	Pts	6-pyruvoyl tetrahydrobiopterin synthase	353060	0	45433	0
	P60521	Gabarapl2	Gamma-aminobutyric acid receptor-associated protein-like 2	350600	0	18130	0
	Q9R0M6	Rab9a	Ras-related protein Rab-9A	154750	0	33911	0
	Q8CFV9	Rfk	Riboflavin kinase	147040	0	39418	0
	Q80ZJ1	Rap2a	Ras-related protein Rap-2a	135330	0	18462	0
	A2ALU4	Shroom2	Protein Shroom2	86093	0	9248.3	0
	Q60952	Cep250	Centrosome-associated protein CEP250	86001	0	868.85	0
	P21126	Ubl4a	Ubiquitin-like protein 4A	56279	0	7806	0
	Q9D6L8	Ppil3	Peptidyl-prolyl cis-trans isomerase-like 3	48855	0	19753	0
	Q8VE95		UPF0598 protein C8orf82 homolog	38013	0	9513.4	0
	Q9CXZ1	Ndufs4	NADH dehydrogenase [ubiquinone] iron-sulfur protein 4, mitochondrial	15225	0	20042	0
	Q9ERS2	Ndufa13	NADH dehydrogenase	7638	0	15488	0
	P56546	Ctbp2	C-terminal-binding protein 2	68708	0	121410	0
	P70336	Rock2	Rho-associated protein kinase 2	287680	0	161860	0
	Q80Y14	Glrx5	Glutaredoxin-related protein 5, mitochondrial	56007	0	14420	0
	Q9CS42	Prps2	Ribose-phosphate pyrophosphokinase 2	665610	0	310910	0
	Q3UGC7	Eif3j1	Eukaryotic translation initiation factor 3 subunit J-A	289680	0	205490	0
	P38060	Hmgcl	Hydroxymethylglutaryl-CoA lyase, mitochondrial (	122780	0	299840	0
	Q9D9V3	Echdc1	Ethylmalonyl-CoA decarboxylase	340570	0	76672	0
	Q91VM9	Ppa2	Inorganic pyrophosphatase 2, mitochondrial	1561000	0	341790	0
	Q99K48	Nono	Non-POU domain-containing octamer-binding protein	0	0	71612	709990
	O35459	Ech1	Delta(3,5)-Delta(2,4)-dienoyl-CoA isomerase, mitochondrial	241930	0	117020	0
	P61290	Psme3	Proteasome activator complex subunit 3	212130	0	113150	0
	Q9JK48	Sh3glb1	Endophilin-B1	59666	0	397800	0
	O35593	Psmd14	26S proteasome non-ATPase regulatory subunit 14	2523700	0	411740	0
	Q9D020	Nt5c3a	Cytosolic 5'-nucleotidase 3A	245310	0	44789	0
	Q9D711	Pir	Pirin	209600	0	159980	0
	P50171	Hsd17b8	Estradiol 17-beta-dehydrogenase 8	130090	0	136530	0
	Q8C3W1		Uncharacterized protein C1orf198 homolog	58679	0	133860	0
	P26516	Psmd7	26S proteasome non-ATPase regulatory subunit 7	173820	0	334370	0
	Q60739	Bag1	BAG family molecular chaperone regulator 1	108920	0	91505	0
	A6X935	Itih4	Inter alpha-trypsin inhibitor, heavy chain 4	34546	0	244600	0
	Q9D819	Ppa1	Inorganic pyrophosphatase	6567400	0	293370	0
	Q99KR7	Ppif	Peptidyl-prolyl cis-trans isomerase F, mitochondrial	36868	0	92731	0
	Q9D1E6	Tbcb	Tubulin-folding cofactor B	2784300	0	38629	0
	Q9CZR8	Tsfm	Elongation factor Ts, mitochondrial (EF-Ts) (EF-TsMt)	179290	0	108140	0
	Q99L85	Elp5	Elongator complex protein 5	57113	0	28495	0
	Q99LP6	Grpel1	GrpE protein homolog 1, mitochondrial	84001	0	123140	0
	Q9CQT1	Mri1	Methylthioribose-1-phosphate isomerase	95303	0	503280	0
	Q9Z1D1	Eif3g	Eukaryotic translation initiation factor 3 subunit G	102330	0	668540	0
	Q91YS8	Camk1	Calcium/calmodulin-dependent protein kinase type 1	104240	0	203290	0
	O88531	Ppt1	Palmitoyl-protein thioesterase 1	988760	0	82034	0
	Q8BH58	Tiprl	TIP41-like protein	703820	0	46374	0
	Q9QYI5	Dnajb2	DnaJ homolog subfamily B member 2	548960	0	42570	0
	O35658	C1qbp	Complement component 1 Q subcomponent-binding protein, mitochondrial	256980	0	67124	0
	O88545	Cops6	COP9 signalosome complex subunit 6	179280	0	89658	0
	P46737	Brcc3	Lys-63-specific deubiquitinase BRCC36	123640	0	68926	0
	Q8BHL8	Psmf1	Proteasome inhibitor PI31 subunit	96974	0	107100	0
	O08992	Sdcbp	Syntenin-1	69771	0	47798	0
	P34152	Ptk2	Focal adhesion kinase 1	69768	0	68379	0
	O35855	Bcat2	Branched-chain-amino-acid aminotransferase, mitochondrial	24147	0	94746	0
	Q62193	Rpa2	Replication protein A 32 kDa subunit	22924	0	59099	0
	Q8K2H2	Otud6b	Deubiquitinase OTUD6B	18580	0	36220	0
	Q9ERF3	Wdr61	WD repeat-containing protein 61	84106	0	25670	0
	O35226	Psmd4	26S proteasome non-ATPase regulatory subunit 4	182700	0	617600	0
	P27601	Gna13	Guanine nucleotide-binding protein subunit alpha-13	12705	0	272130	0
	P24452	Capg	Macrophage-capping protein	30314	0	610480	0
	P21278	Gna11	Guanine nucleotide-binding protein subunit alpha-11	126990	0	140300	0
	Q9CRC9	Gnpda2	Glucosamine-6-phosphate isomerase 2	385710	0	45920	0
	Q8C5H8	Nadk2	NAD kinase 2, mitochondrial	359170	0	114190	0
	Q9CR09	Ufc1	Ubiquitin-fold modifier-conjugating enzyme 1	174030	0	152250	0
	O88958	Gnpda1	Glucosamine-6-phosphate isomerase 1	873600	0	51015	0
	Q9DBS2	Tprg1l	Tumor protein p63-regulated gene 1-like protein	491570	0	49178	0
	Q9DCL8	Ppp1r2	Protein phosphatase inhibitor 2	403460	0	127130	0
	Q8R4N0	Clybl	Citramalyl-CoA lyase, mitochondrial	386940	0	2873.4	0
	Q9JIY5	Htra2	Serine protease HTRA2, mitochondrial	263070	0	7038.3	0
	Q9JMD3	Stard10	START domain-containing protein 10	234180	0	41160	0
	Q920E5	Fdps	Farnesyl pyrophosphate synthase	208030	0	62768	0
	Q9CR98	Fam136a	Protein FAM136A	31041	0	23843	0
	Q8CG72	Adprhl2	Poly(ADP-ribose) glycohydrolase ARH3	131280	0	402200	0
	Q9CXX9	Cuedc2	CUE domain-containing protein 2	72670	0	28668	0
	Q9D1P4	Chordc1	Cysteine and histidine-rich domain-containing protein 1	33175	0	21464	0
	P08003	Pdia4	Protein disulfide-isomerase A4	719060	0	3250600	0
	Q9JJZ2	Tuba8	Tubulin alpha-8 chain	92015	0	273770	0
	Q60902	Eps15l1	Epidermal growth factor receptor substrate 15-like 1	214040	0	317580	0
	Q91W50	Csde1	Cold shock domain-containing protein E1	176220	0	305530	0
	Q8VDP4	Ccar2	Cell cycle and apoptosis regulator protein 2	68346	0	275610	0
	Q99MN1	Kars	Lysine--tRNA ligase	347180	0	737490	0
	P16332	Mut	Methylmalonyl-CoA mutase, mitochondrial	28461	0	345840	0
	Q8JZQ9	Eif3b	Eukaryotic translation initiation factor 3 subunit B	26163	0	456940	0
	Q9D0R2	Tars	Threonine--tRNA ligase, cytoplasmic	8244.1	0	152440	0
	Q71LX4	Tln2	Talin-2	323820	0	4586.3	0
	O88544	Cops4	COP9 signalosome complex subunit 4	142210	0	1506400	0
	Q00PI9	Hnrnpul2	Heterogeneous nuclear ribonucleoprotein U-like protein 2	130340	0	341840	0
	Q9QYR9	Acot2	Acyl-coenzyme A thioesterase 2, mitochondrial	45086	0	534330	0
	Q9D2R0	Aacs	Acetoacetyl-CoA synthetase	39199	0	183700	0
	P54775	Psmc4	26S proteasome regulatory subunit 6B	381900	0	381760	0
	Q9ESN9	Mapk8ip3	C-Jun-amino-terminal kinase-interacting protein 3	54527	0	71897	0
	P29533	Vcam1	Vascular cell adhesion protein 1	21594	0	119650	0
	Q9D906	Atg7	Ubiquitin-like modifier-activating enzyme ATG7	13177	0	135210	0
	P63005	Pafah1b1	Platelet-activating factor acetylhydrolase IB subunit alpha	5457100	0	650060	0
	P39054	Dnm2	Dynamin-2	130200	0	51166	0
	Q9D061	Acbd6	Acyl-CoA-binding domain-containing protein 6	58927	0	7235.6	0
	Q9D0S9	Hint2	Histidine triad nucleotide-binding protein 2, mitochondrial	179760	0	42599	0
	Q9D142	Nudt14	Uridine diphosphate glucose pyrophosphatase	83994	0	75701	0
	P54726	Rad23a	UV excision repair protein RAD23 homolog A	199540	0	702910	0
	Q9WVJ2	Psmd13	26S proteasome non-ATPase regulatory subunit 13	139730	0	296360	0
	Q8BUK6	Hook3	Protein Hook homolog 3	68545	0	114020	0
	Q64737	Gart	Trifunctional purine biosynthetic protein adenosine-3 [	44932	0	62752	0
	O08795	Prkcsh	Glucosidase 2 subunit beta	228890	0	917660	0
	Q6IR34	Gpsm1	G-protein-signaling modulator 1	85212	0	131740	0
	Q02257	Jup	Junction plakoglobin	94762	0	120130	0
	P35564	Canx	Calnexin	48586	0	146200	0
	O35685	Nudc	Nuclear migration protein nudC	1543300	0	578010	0
	Q8VCA8	Scrn2	Secernin-2	303650	0	521960	0
	Q9JK81	Myg1	UPF0160 protein MYG1, mitochondrial	252170	0	173060	0
	Q9D4H8	Cul2	Cullin-2	3747.5	0	3683.4	0
	Q3U5Q7	Cmpk2	UMP-CMP kinase 2, mitochondrial	129880	0	650210	0
	F6ZDS4	Tpr	Nucleoprotein TPR	73750	0	19378	0
	Q8JZV7	Amdhd2	N-acetylglucosamine-6-phosphate deacetylase	63332	0	519120	0
	Q80YV4	Pank4	Pantothenate kinase 4	29032	0	79230	0
	A2AWA9	Rabgap1	Rab GTPase-activating protein 1	5353.5	0	89320	0
	Q9D2Y4	Mlkl	Mixed lineage kinase domain-like protein	4637.6	0	334500	0
	Q9DBD0	Ica	Inhibitor of carbonic anhydrase	41353	0	98707	0
	Q9D8B3	Chmp4b	Charged multivesicular body protein 4b	31454	0	27238	0
	Q9DCB8	Isca2	Iron-sulfur cluster assembly 2 homolog, mitochondrial	1330600	0	124860	0
	P58404	Strn4	Striatin-4	73316	0	229610	0
	Q8C7R4	Uba6	Ubiquitin-like modifier-activating enzyme 6	52666	0	35417	0
	Q8R3B1	Plcd1	1-phosphatidylinositol 4,5-bisphosphate phosphodiesterase delta-1	38549	0	47544	0
	Q9R0I7	Ylpm1	YLP motif-containing protein 1	4562.8	0	91521	0
	Q9D9J8	Bpifa3	BPI fold-containing family A member 3	0	0	2181500	18014000
	Q9DBL1	Acadsb	Short/branched chain specific acyl-CoA dehydrogenase, mitochondrial	26941	0	43045	0
	Q9DBC0	Selenoo	Selenoprotein O	129920	0	210480	0
	Q80VP1	Epn1	Epsin-1	1316200	0	422870	0
	Q9Z2Q6	Sept5	Septin-5	1510000	0	508870	0
	Q811D0	Dlg1	Disks large homolog 1	1490200	0	52198	0
	Q6ZWM4	Lsm8	U6 snRNA-associated Sm-like protein LSm8	310020	0	199520	0
	Q91WU5	As3mt	Arsenite methyltransferase	265790	0	250420	0
	Q8R0H9	Gga1	ADP-ribosylation factor-binding protein GGA1	148530	0	96054	0
	P12849	Prkar1b	cAMP-dependent protein kinase type I-beta regulatory subunit	145240	0	53188	0
	Q9QZB7	Actr10	Actin-related protein 10	111450	0	146820	0
	Q3THG9	Aarsd1 Alax	Alanyl-tRNA editing protein Aarsd1	77588	0	336590	0
	P56135	Atp5j2	ATP synthase subunit f, mitochondrial	46211	0	235510	0
	P56376	Acyp1	Acylphosphatase-1	37565	0	96206	0
	Q99K70	Rragc	Ras-related GTP-binding protein C	34154	0	135480	0
	P03958	Ada	Adenosine deaminase	29237	0	222520	0
	Q921W4	Cryzl1	Quinone oxidoreductase-like protein 1	28120	0	136800	0
	Q8C079	Strip1	Striatin-interacting protein 1	8845.2	0	77929	0
	Q9DD18	Dtd1	D-aminoacyl-tRNA deacylase 1	64701	0	101100	0
	P27612	Plaa	Phospholipase A-2-activating protein	482260	0	19360	0
	Q91YP2	Nln	Neurolysin, mitochondrial	201030	0	26151	0
	Q8BHB9	Clic6	Chloride intracellular channel protein 6	17197	0	22872	0
	Q62419	Sh3gl1	Endophilin-A2	3615100	0	98762	0
	Q91Z38	Ttc1	Tetratricopeptide repeat protein 1	918510	0	54925	0
	Q9JIF0	Prmt1	Protein arginine N-methyltransferase 1	247600	0	193000	0
	O89023	Tpp1	Tripeptidyl-peptidase 1	242420	0	148970	0
	Q8C878	Uba3	NEDD8-activating enzyme E1 catalytic subunit	157240	0	116480	0
	P12710	Fabp1	Fatty acid-binding protein, liver	138580	0	169260	0
	Q71RI9	Kyat3	Kynurenine--oxoglutarate transaminase 3	114720	0	110770	0
	Q61234	Snta1	Alpha-1-syntrophin	89942	0	29337	0
	Q99JF5	Mvd	Diphosphomevalonate decarboxylase	88501	0	36108	0
	Q8K2X3	Stn1	CST complex subunit STN1	45014	0	28971	0
	Q06185	Atp5i	ATP synthase subunit e, mitochondrial	43528	0	326240	0
	Q3TC93	Hs1bp3	HCLS1-binding protein 3	43329	0	43292	0
	P01887	B2m	Beta-2-microglobulin	42524	0	711560	0
	E9Q557	Dsp	Desmoplakin	25811	0	1345	0
	O08917	Flot1	Flotillin-1	13950	0	38405	0
	Q9ERR1	Ndel1	Nuclear distribution protein nudE-like 1	13030	0	152060	0
	Q9JKK8	Atr Kiaa4069	Serine/threonine-protein kinase ATR	322380	0	1169900	0
	O88271	Cfdp1	Craniofacial development protein 1	344510	0	637030	0
	Q9Z277	Baz1b	Tyrosine-protein kinase BAZ1B	111100	0	7592.4	0
	P18242	Ctsd	Cathepsin D	2217000	0	142280	0
	P56375	Acyp2	Acylphosphatase-2	1975200	0	117590	0
	P18572	Bsg	Basigin	1129700	0	62084	0
	Q922E4	Pcyt2	Ethanolamine-phosphate cytidylyltransferase	739030	0	27075	0
	Q5SVL6	Rap1	Rap1 GTPase-activating protein 2	632000	0	17182	0
	Q9QZE7	Tsnax	Translin-associated protein X	40229	0	8327.9	0
	Q8C5W3	Tbcel	Tubulin-specific chaperone cofactor E-like protein	242110	0	90910	0
	Q9QZZ6	Dpt	Dermatopontin	0	0	108170	0
	Q6NVE8	Wdr44	WD repeat-containing protein 44	147460	0	7106.2	0
	Q8R5F7	Ifih1	Interferon-induced helicase C domain-containing protein 1	144100	0	40987	0
	Q8BP40	Acp6	Lysophosphatidic acid phosphatase type 6	124720	0	43331	0
	Q9DCG9	Trmt112	Multifunctional methyltransferase subunit TRM112-like protein	94640	0	54885	0
	Q9JK42	Pdk2	[Pyruvate dehydrogenase (acetyl-transferring)] kinase isozyme 2, mitochondrial	82157	0	25785	0
	Q07076	Anxa7	Annexin A7	76015	0	42364	0
	Q60866	Pter	Phosphotriesterase-related protein	72926	0	49141	0
	Q5U3K5	Rabl6	Rab-like protein 6	70911	0	21946	0
	O54916	Reps1	RalBP1-associated Eps domain-containing protein 1	59208	0	14683	0
	Q9JME7	Trappc2l	Trafficking protein particle complex subunit 2-like protein	52335	0	14424	0
	Q9DBX2	Pdcl	Phosducin-like protein	45773	0	56993	0
	Q80SU7	Gvin1	Interferon-induced very large GTPase 1	37311	0	1932.1	0
	P20060	Hexb	Beta-hexosaminidase subunit beta	36620	0	29879	0
	Q8CHG7	Rapgef2	Rap guanine nucleotide exchange factor 2	28346	0	15226	0
	P28658	Atxn10	Ataxin-10	25039	0	46737	0
	Q8CAQ8	Immt	MICOS complex subunit Mic60	17670	0	5907.3	0
	Q01279	Egfr	Epidermal growth factor receptor	12895	0	1909.8	0
	Q8BFU3	Rnf214	RING finger protein 214	12891	0	8997.2	0
	Q9QWY8	Asap1	Arf-GAP with SH3 domain, ANK repeat and PH domain-containing protein 1	12659	0	7547.5	0
	Q9JKY5	Hip1r	Huntingtin-interacting protein 1-related protein (HIP1-related protein)	3694.9	0	1937.4	0
	Q9Z0H8	Clip2	CAP-Gly domain-containing linker protein 2	6209.2	0	5620.3	0
	Q9Z2D0	Mtmr9	Myotubularin-related protein 9	0	6608.2	17452	0
	Q9Z2V5	Hdac6	Histone deacetylase 6	40223	6596.9	20926	0
